# Supplementary material
Source: PubMed Central journal article supplement (PMC4142477)
Supplement: NIHMS608089-supplement-Supporting_Information.pdf [file NIHMS608089-supplement-Supporting_Information.pdf]

## Supporting Information

© Copyright Wiley-VCH Verlag GmbH & Co. KGaA, 69451 Weinheim, 2014

### **Development of Cyclobutene- and Cyclobutane- Functionalized Fatty Acids with Inhibitory Activity against *Mycobacterium tuberculosis***

Wantanee Sittiwong,<sup>[a]</sup> Denise K. Zinniel,<sup>[b]</sup> Robert J. Fenton,<sup>[b]</sup> Darrell D. Marshall,<sup>[a]</sup>  
Courtney B. Story,<sup>[a]</sup> Bohkyung Kim,<sup>[c]</sup> Ji-Young Lee,<sup>[c]</sup> Robert Powers,<sup>[a]</sup> Raúl G. Barletta,<sup>[b]</sup> and  
Patrick H. Dussault<sup>\*[a]</sup>

cmdc\_201402067\_sm\_miscellaneous\_information.pdf

| Description of Material                                                                                                                                                                                    | page numbers |
|------------------------------------------------------------------------------------------------------------------------------------------------------------------------------------------------------------|--------------|
| Synthesis of known benzyl esters                                                                                                                                                                           | 2-3          |
| Cytotoxicity data                                                                                                                                                                                          | 4            |
| Thermal stability data                                                                                                                                                                                     | 5-10         |
| Investigation of aggregation in aqueous buffer. Stacked <sup>1</sup> H NMR plots for decenoic acid ( <b>12</b> ), oleic acid ( <b>13</b> ), and analogs <b>2</b> , <b>4</b> , <b>5</b> , and <b>7-11</b> . | 11-20        |
| References for experimental materials                                                                                                                                                                      | 21           |
| <sup>1</sup> H-NMR and <sup>13</sup> C-NMR spectrum of 9-decenoic acid, benzyl ester                                                                                                                       | 22           |
| <sup>1</sup> H-NMR and <sup>13</sup> C-NMR spectrum of <b>15</b>                                                                                                                                           | 23           |
| <sup>1</sup> H-NMR and <sup>13</sup> C-NMR spectrum of dichlorocyclobutanols (C10 series)                                                                                                                  | 24           |
| <sup>1</sup> H-NMR and <sup>13</sup> C-NMR spectrum of <b>16</b>                                                                                                                                           | 25           |
| <sup>1</sup> H-NMR and <sup>13</sup> C-NMR spectrum of <b>1</b>                                                                                                                                            | 26           |
| <sup>1</sup> H-NMR and <sup>13</sup> C-NMR spectrum of <b>2</b>                                                                                                                                            | 27           |
| <sup>1</sup> H-NMR and <sup>13</sup> C-NMR spectrum of <b>17</b>                                                                                                                                           | 28           |
| <sup>1</sup> H-NMR and <sup>13</sup> C-NMR spectrum of <b>3</b>                                                                                                                                            | 29           |
| <sup>1</sup> H-NMR and <sup>13</sup> C-NMR spectrum of <b>18</b>                                                                                                                                           | 30           |
| <sup>1</sup> H-NMR and <sup>13</sup> C-NMR spectrum of <b>4</b>                                                                                                                                            | 31           |
| <sup>1</sup> H-NMR and <sup>13</sup> C-NMR spectrum of <b>19</b> (mixture and individual isomers)                                                                                                          | 32-37        |
| <sup>1</sup> H-NMR and <sup>13</sup> C-NMR spectrum of <b>20</b> (mixture and individual isomers)                                                                                                          | 38-42        |
| <sup>1</sup> H-NMR and <sup>13</sup> C-NMR spectrum of <b>5</b>                                                                                                                                            | 43           |
| <sup>1</sup> H-NMR and <sup>13</sup> C-NMR spectrum of <b>6</b>                                                                                                                                            | 44           |
| <sup>1</sup> H-NMR and <sup>13</sup> C-NMR spectrum of <b>21</b>                                                                                                                                           | 45           |
| <sup>1</sup> H-NMR and <sup>13</sup> C-NMR spectrum of <b>7</b>                                                                                                                                            | 46           |
| <sup>1</sup> H-NMR and <sup>13</sup> C-NMR spectrum of <i>cis</i> -18:1 cyclobutanols (benzyl esters)                                                                                                      | 47           |
| <sup>1</sup> H-NMR and <sup>13</sup> C-NMR spectrum of <b>8</b>                                                                                                                                            | 48           |
| <sup>1</sup> H-NMR and <sup>13</sup> C-NMR spectrum of <b>22</b>                                                                                                                                           | 49           |
| <sup>1</sup> H-NMR and <sup>13</sup> C-NMR spectrum of <b>9</b>                                                                                                                                            | 50           |
| <sup>1</sup> H-NMR and <sup>13</sup> C-NMR spectrum of benzyl elaidate                                                                                                                                     | 51           |
| <sup>1</sup> H-NMR and <sup>13</sup> C-NMR spectrum of <b>23</b>                                                                                                                                           | 52           |
| <sup>1</sup> H-NMR and <sup>13</sup> C-NMR spectrum of dichlorocyclobutanols ( <i>trans</i> 18:1 series)                                                                                                   | 53-57        |
| <sup>1</sup> H-NMR and <sup>13</sup> C-NMR spectrum of <b>24</b>                                                                                                                                           | 58           |
| <sup>1</sup> H-NMR and <sup>13</sup> C-NMR spectrum of <b>10</b>                                                                                                                                           | 59           |
| <sup>1</sup> H-NMR and <sup>13</sup> C-NMR spectrum of chloroketones (benzyl ester)                                                                                                                        | 60           |
| <sup>1</sup> H-NMR and <sup>13</sup> C-NMR spectrum of <b>11</b>                                                                                                                                           | 61           |

**Benzyl 9-decenoate** was prepared by a known procedure.<sup>1</sup> Thionyl chloride (36.9 mL, 51 mmol) was added to a stirred solution of 9-decenoic acid **DA** (8.67 g, 51 mmol) and catalytic dimethylformamide (DMF, 0.12 mL, 1.5 mmol) in toluene (400 mL). The reaction was stirred at rt until the starting material was consumed (TLC, ~ 24 h). The reaction was concentrated and the residue redissolved in toluene (400 mL) and triethylamine (8.5 mL). The solution was stirred for 24 h and washed with water. The aqueous layer was then extracted with ether. The combined organic solution were combined, dried with Na<sub>2</sub>SO<sub>4</sub>, and concentrated under vacuum. The residue was purified by flash column chromatography on silica gel (5-10% EtOAc in Hex) to give benzyl 9-decenoate (13.1 g, 99%) as a colorless oil:  $R_f = 0.40$  (10% EtOAc/ Hex); IR (ZnSe, cm<sup>-1</sup>): 3072, 2927, 2855, 1734, 1161, 908, 730 cm<sup>-1</sup>; <sup>1</sup>H NMR:  $\delta$  7.38-7.32 (m, 5H), 5.83 (ddt,  $J = 17, 10.2, 6.6$  Hz, 1H), 5.14 (s, 2H), 5.02 (ddd,  $J = 7.6$  Hz, 2H), 5.00 (dq,  $J = 17.0, 1.7$  Hz, 1H), 4.96 (d of quintet,  $J = 10.2, 1.2$  Hz, 1H), 2.37 (t,  $J = 7.3$  Hz, 2H), 2.10-2.02 (br q,  $J = 7.3$  Hz, 2H), 1.70-1.63 (br m, 2H), 1.41-1.48 (m, 10H); <sup>13</sup>C NMR:  $\delta$  173.5, 138.9, 136.1, 128.4, 128.1, 128.0, 114.1, 65.9, 34.2, 33.7, 28.99, 28.97, 28.8, 28.7, 24.8, 22.6, 14.0; HRESI-MS: calcd. for C<sub>17</sub>H<sub>24</sub>O<sub>2</sub>Na: [M+Na]<sup>+</sup> 283.1674; Found: 283.1671.

**(Z)-9-Octadecenoate, benzyl ester (benzyl oleate)** was prepared by a variation of a known procedure.<sup>2</sup> Benzyl alcohol (3.83 g, 35.4 mmol) was added to a stirred solution of oleic acid (5.136 g, 18.1 mmol) and DMAP (43.7 mg, 3.57 mmol) in CH<sub>2</sub>Cl<sub>2</sub> (40 mL). The solution was cooled to 0 °C and DCC (4.211 g, 20.4 mmol) was added. The mixture was allowed to warm to rt and stirred for 2.5 h. The resulting suspension was filtered through a cotton plug and the precipitate was washed with CH<sub>2</sub>Cl<sub>2</sub>. The CH<sub>2</sub>Cl<sub>2</sub> solution was washed with water and dried over Na<sub>2</sub>SO<sub>4</sub>. Evaporation of the organic solvent and flash chromatography of the residue over silica gel, using 5% EtOAc/Hex, gave benzyl oleate (5.73 g, 85 %) as a colorless oil:  $R_f = 0.83$  (10%

EtOAc/Hex); IR (ZnSe,  $\text{cm}^{-1}$ ) 2924, 2853, 1738, 1456, 1162, 696  $\text{cm}^{-1}$ ;  $^1\text{H}$  NMR:  $\delta$  7.38-7.31 (5H), 5.41-5.31 (2H), 5.13 (s, 2H), 2.37 (t,  $J = 7.6$  Hz, 2H), 2.05-2.00 (4H), 1.70-1.62 (m, 2H), 1.40-1.29 (20H), 0.90 (t,  $J = 6.8$  Hz, 3H);  $^{13}\text{C}$  NMR  $\delta$  173.6, 136.12, 129.9, 129.7, 128.5 (two overlapping signals), 128.11, 128.09, 66.0, 34.3, 31.9, 29.7, 29.6, 29.50, 29.3, 29.1, 29.1, 27.2, 27.1, 24.9, 22.7, 14.1.

**(*E*)-9-octadecenoic acid, benzyl ester (benzyl elaidate)**<sup>3</sup> was prepared from the reaction of elaidic acid (0.9836, 3.5 mmol), DCC (0.79 g, 3.8 mmol), DMAP (0.087 g, 0.7 mmol), and benzyl alcohol (0.73 mL, 7 mmol) in  $\text{CH}_2\text{Cl}_2$  (10 mL) by a similar procedure as employed for benzyl oleate. The product was purified by flash column chromatography on silica gel (2.5% / 5% EtOAc/Hex) to afford 1.2280 g (95%) of benzyl elaidate as a colorless oil:  $R_f = 0.57$  (10% EtOAc/Hex). IR (ZnSe,  $\text{cm}^{-1}$ ) 2922, 2852, 2737, 1160, 966, 696  $\text{cm}^{-1}$ ;  $^1\text{H}$  NMR:  $\delta$  7.38-7.34 (m, 5H), 5.41-5.38 (m, 2H), 5.13 (s, 2H), 2.37 (t,  $J = 7.2$  Hz, 2H), 1.98 (br s, 4H), 1.68-1.63 (m, 2H), 1.38-1.18 (br m, 20H), 0.90 (t,  $J = 7.2$  Hz, 3H);  $^{13}\text{C}$  NMR  $\delta$  173.6, 136.1, 130.4, 130.2, 128.5, 128.1, 66.0, 34.3, 32.57, 32.52, 31.9, 29.6, 29.52, 29.46, 29.3, 29.2, 29.1, 29.0, 28.9, 24.9, 22.7, 14.1.

## Data from cytotoxicity studies

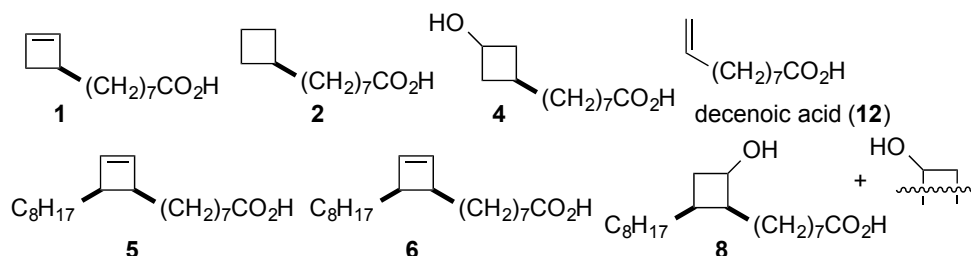

Figure S1. Analogs investigated

Table S1. Toxicity of Fatty acid analogs in RAW 2647 macrophages

| Compound      | Average % viability at indicated concentration ( $\mu\text{M}$ ) |      |      |      |      |                      |
|---------------|------------------------------------------------------------------|------|------|------|------|----------------------|
|               | 0                                                                | 25   | 50   | 100  | 250  | Control <sup>a</sup> |
| 1 (DA-CB)     | 100                                                              | 67.8 | 58.5 | 48.1 | 0.9  | 0.2                  |
| 2 (DA-satCB)  | 100                                                              | 72.9 | 49.2 | 7.5  | 0.6  | 0.2                  |
| 4 (DA-alcCB)  | 100                                                              | 86.5 | 78.7 | 77.5 | 58.8 | 0.2                  |
| 5 (OA-CB)     | 100                                                              | 93.8 | 91.8 | 89.3 | 73.4 | 0.2                  |
| 6 (OA-satCB)  | 100                                                              | 87.8 | 84.6 | 82.5 | 78.9 | 0.2                  |
| 8 (OA-alcCB)  | 100                                                              | 5.5  | 4.4  | 4.4  | 3.7  | 0.2                  |
| DA            | 100                                                              | 83.5 | 77.3 | 73   | 38.3 | 0.2                  |
| D-cycloserine | 100                                                              | 81.8 | 77.5 | 72.2 | 69.4 | 0.2                  |
| Isoniazid     | 100                                                              | 76.5 | 75.1 | 71.7 | 64   | 0.2                  |

a. Sodium dodecyl sulfate (SDS)

## Thermal Stability (Figure S1-S11)

Differential scanning calorimetry (DSC) and thermal gravimetric analysis (TGA) were acquired simultaneously on 4-10 mg samples of the indicated molecules, using a Perkin Elmer STA 6000 analyzer operated at a temperature ramp of 2 °C/minute except for compound **5** at a 5 °C/minute

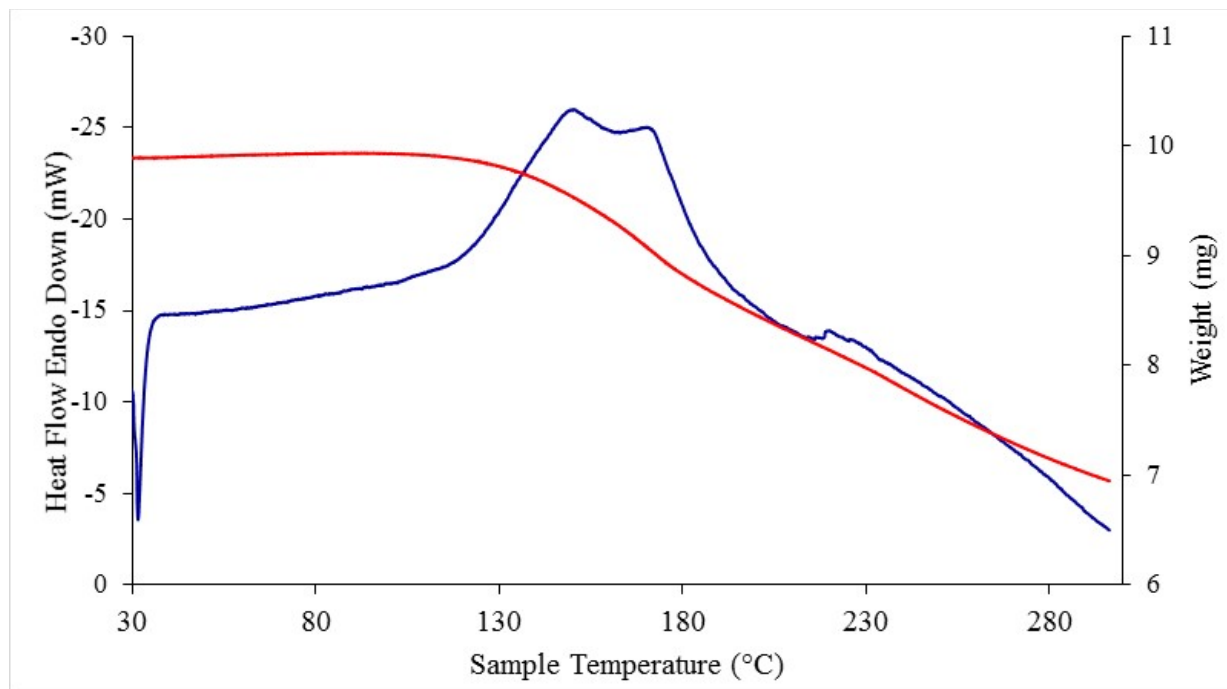

**Figure S1.** Thermal stability of **1**. TGA-measured mass (red) and DSC-measured heat flow (blue).

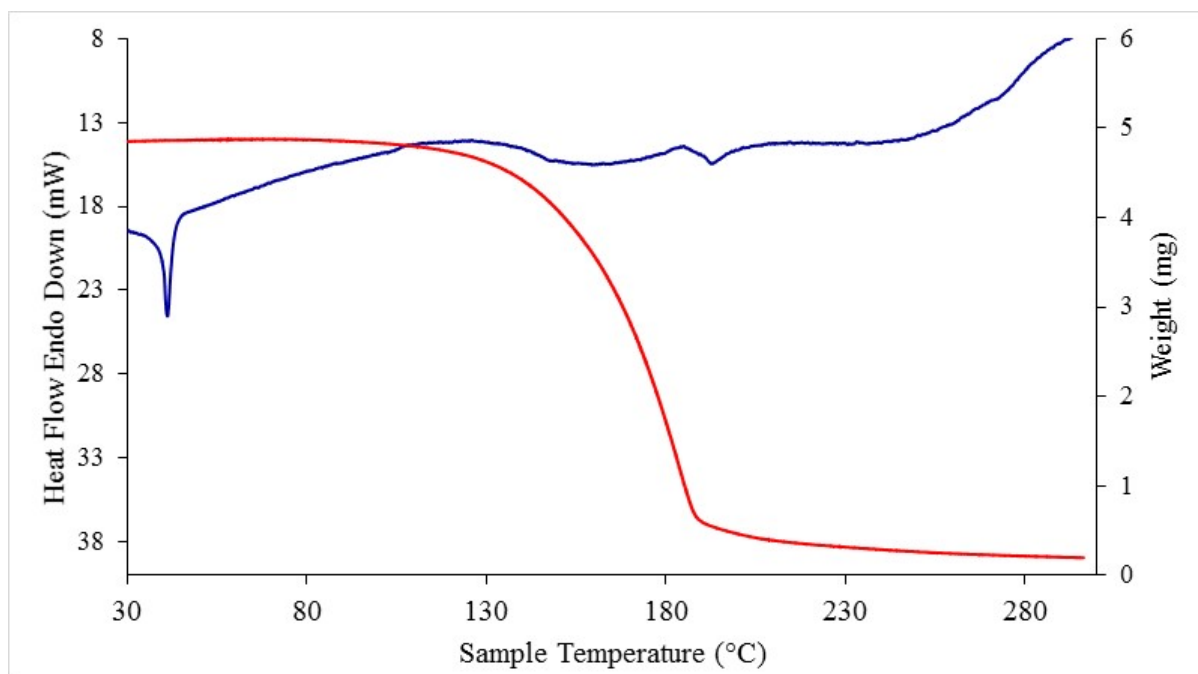

**Figure S2.** Thermal stability of **2**. TGA-measured mass (red) and DSC-measured heat flow (blue).

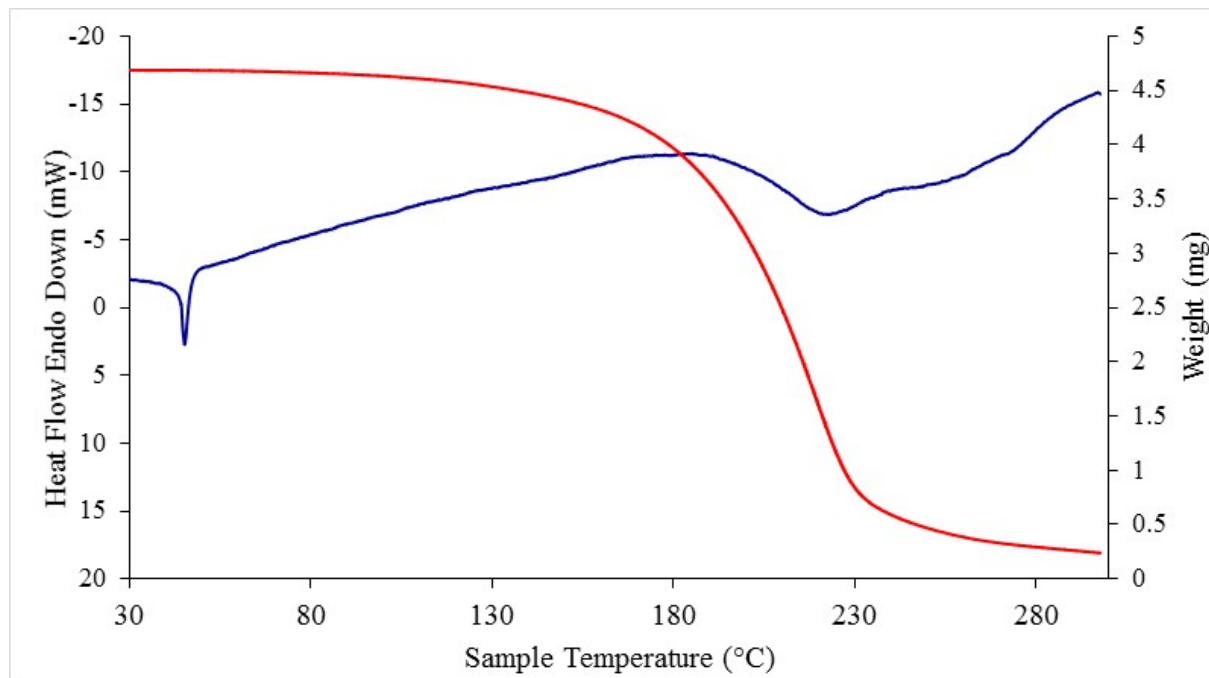

**Figure S3.** Thermal stability of **3**. TGA-measured mass (red) and DSC-measured heat flow (blue).

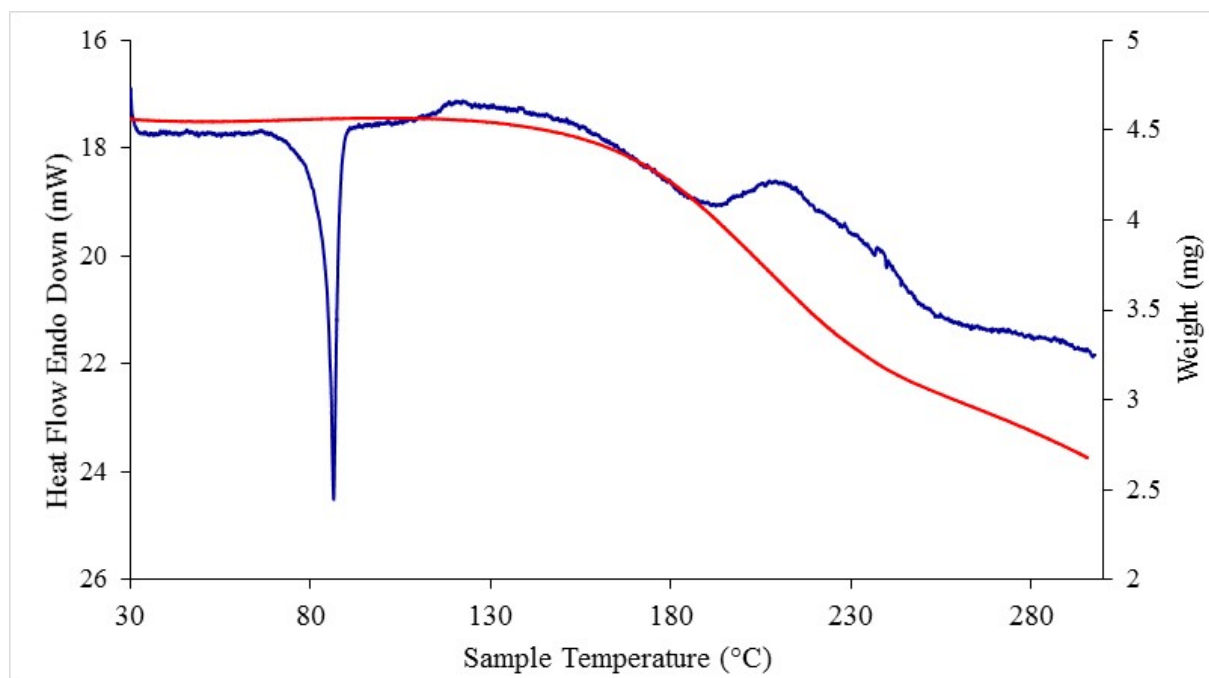

**Figure S4.** Thermal stability of **4**. TGA-measured mass (red) and DSC-measured heat flow (blue).

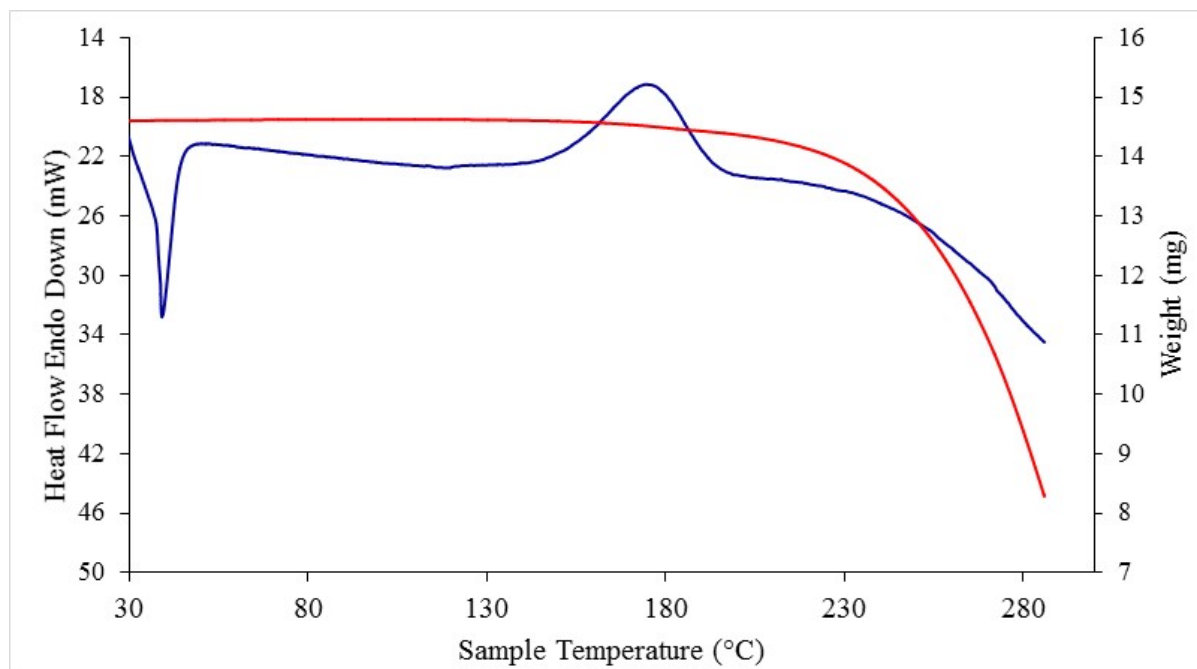

**Figure S5.** Thermal stability of **5**. TGA-measured mass (red) and DSC-measured heat flow (blue).



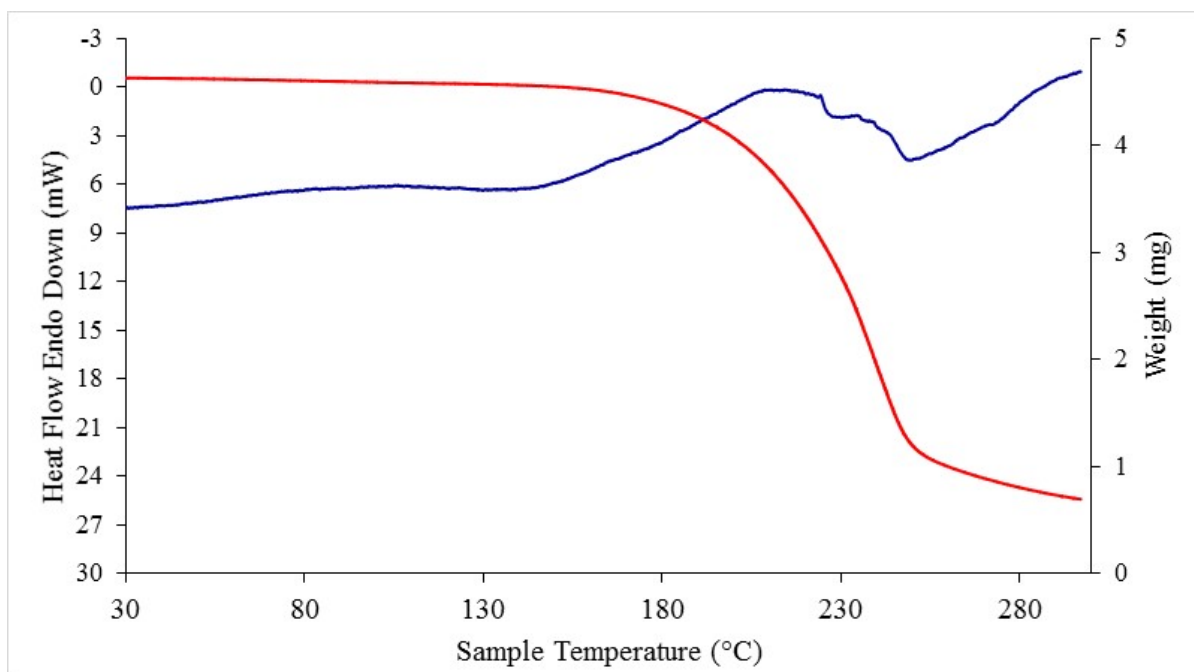

**Figure S6.** Thermal stability of **6**. TGA-measured mass (red) and DSC-measured heat flow (blue).

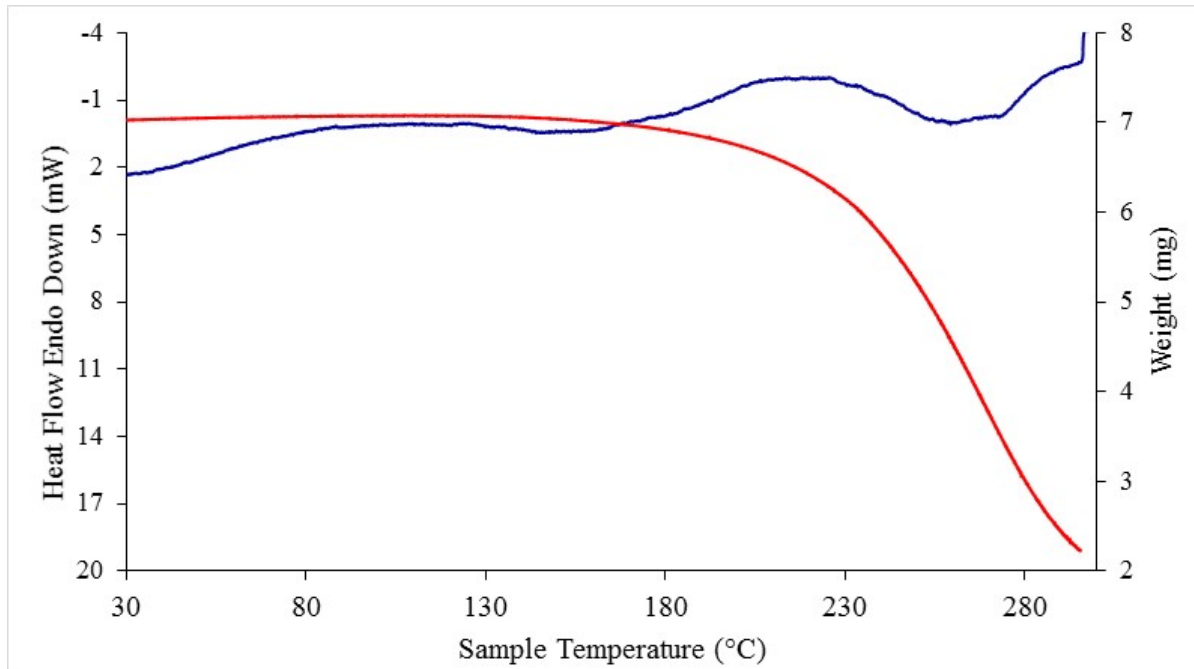

**Figure S7.** Thermal stability of **7**. TGA-measured mass (red) and DSC-measured heat flow (blue).

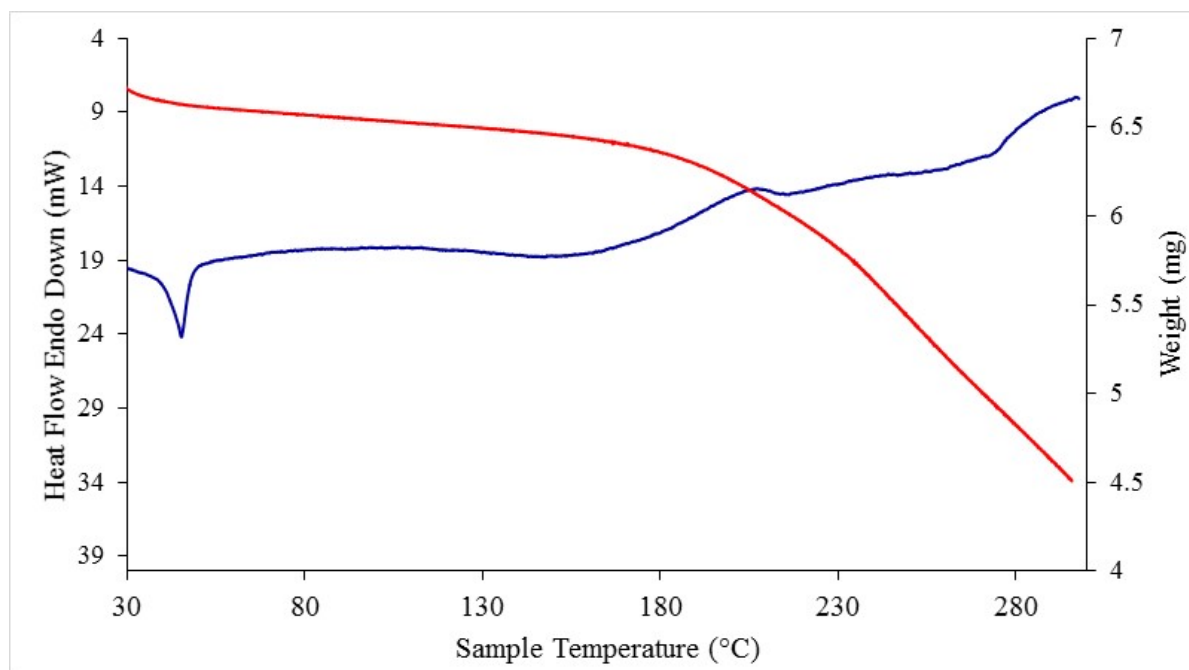

**Figure S8.** Thermal stability of **8**. TGA-measured mass (red) and DSC-measured heat flow (blue).

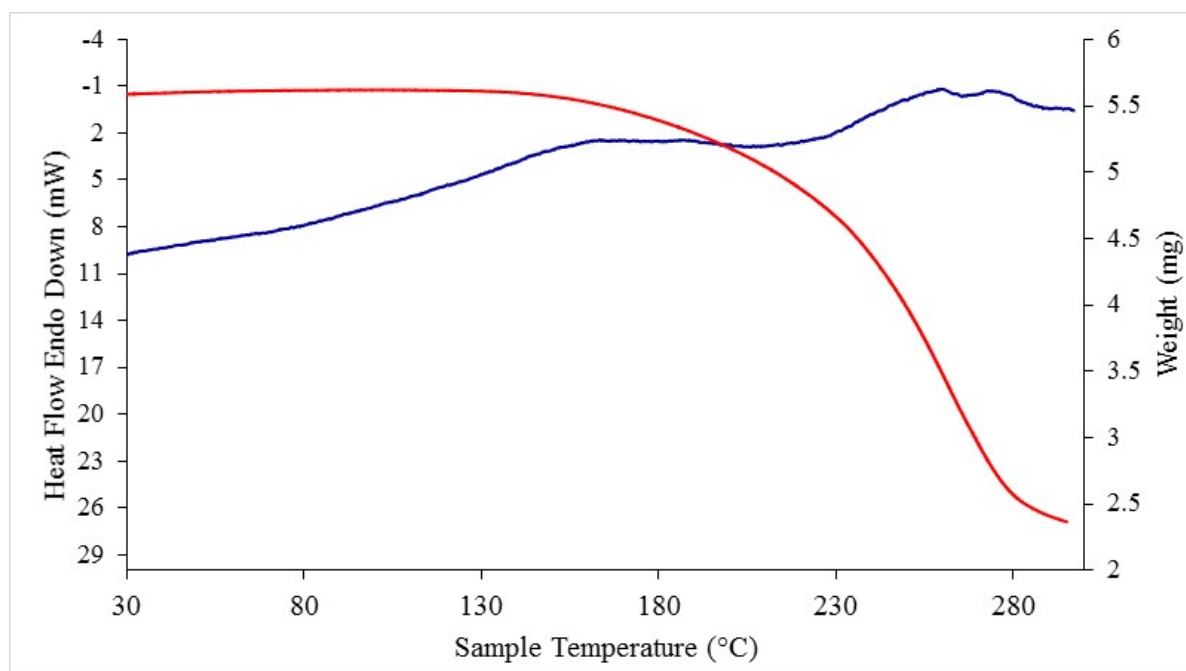

**Figure S9.** Thermal stability of **9**. TGA-measured mass (red) and DSC-measured heat flow (blue).

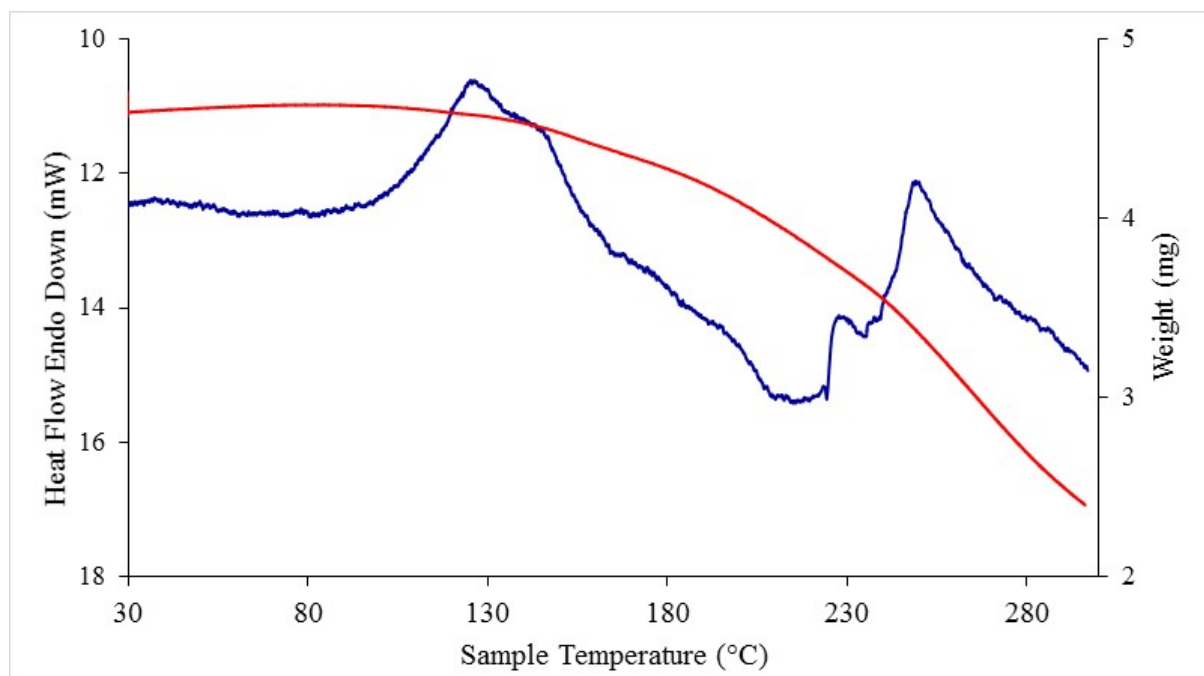

**Figure S10.** Thermal stability of **10**. TGA-measured mass (red) and DSC-measured heat flow (blue).

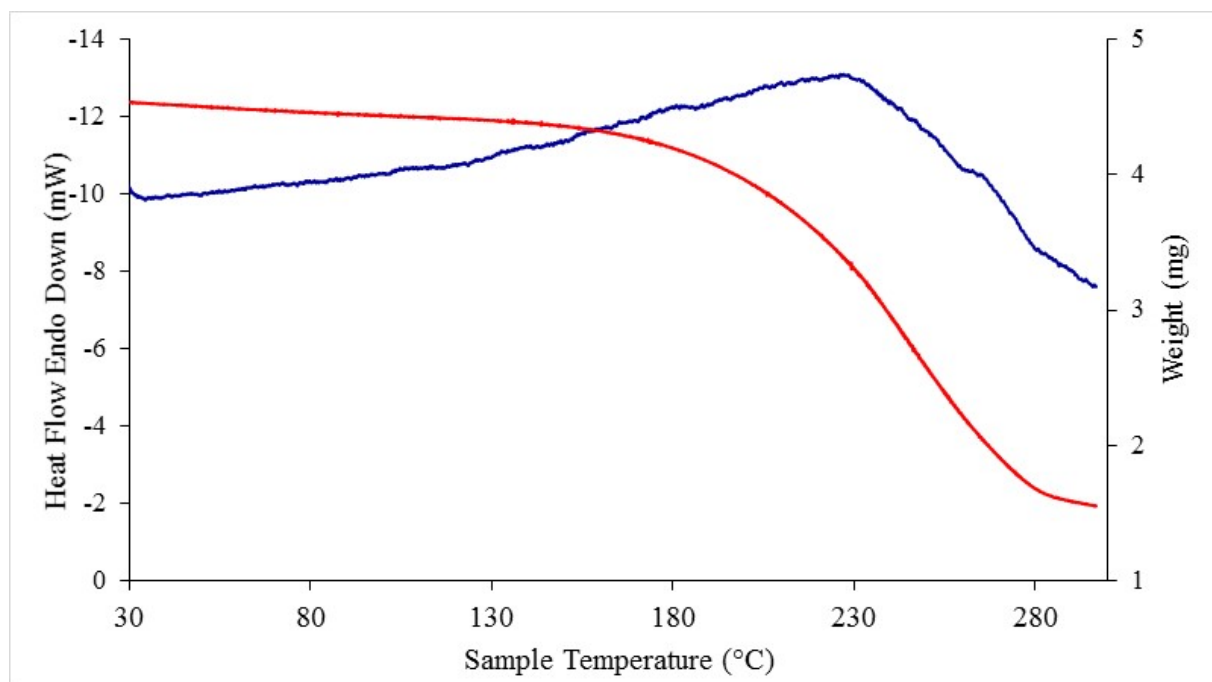

**Figure S11.** Thermal stability of **11**. TGA-measured mass (red) and DSC-measured heat flow (blue).

# Decenoic acid: aggregation assay in phosphate buffer

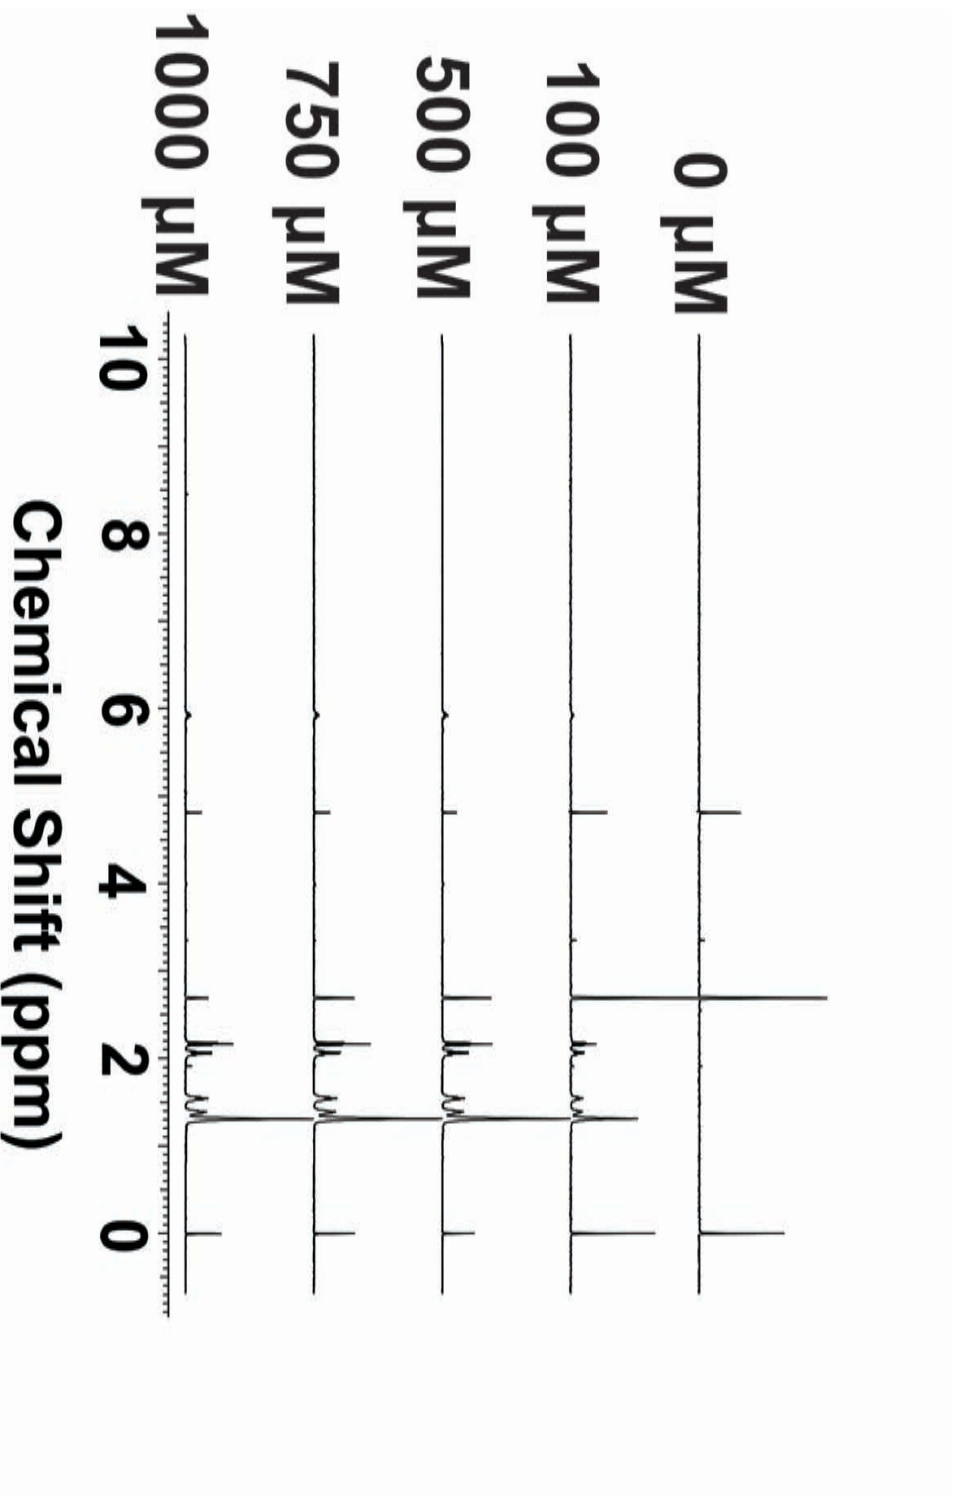

# Analog 2 (C<sub>10</sub> cyclobutane); aggregation assay in phosphate buffer

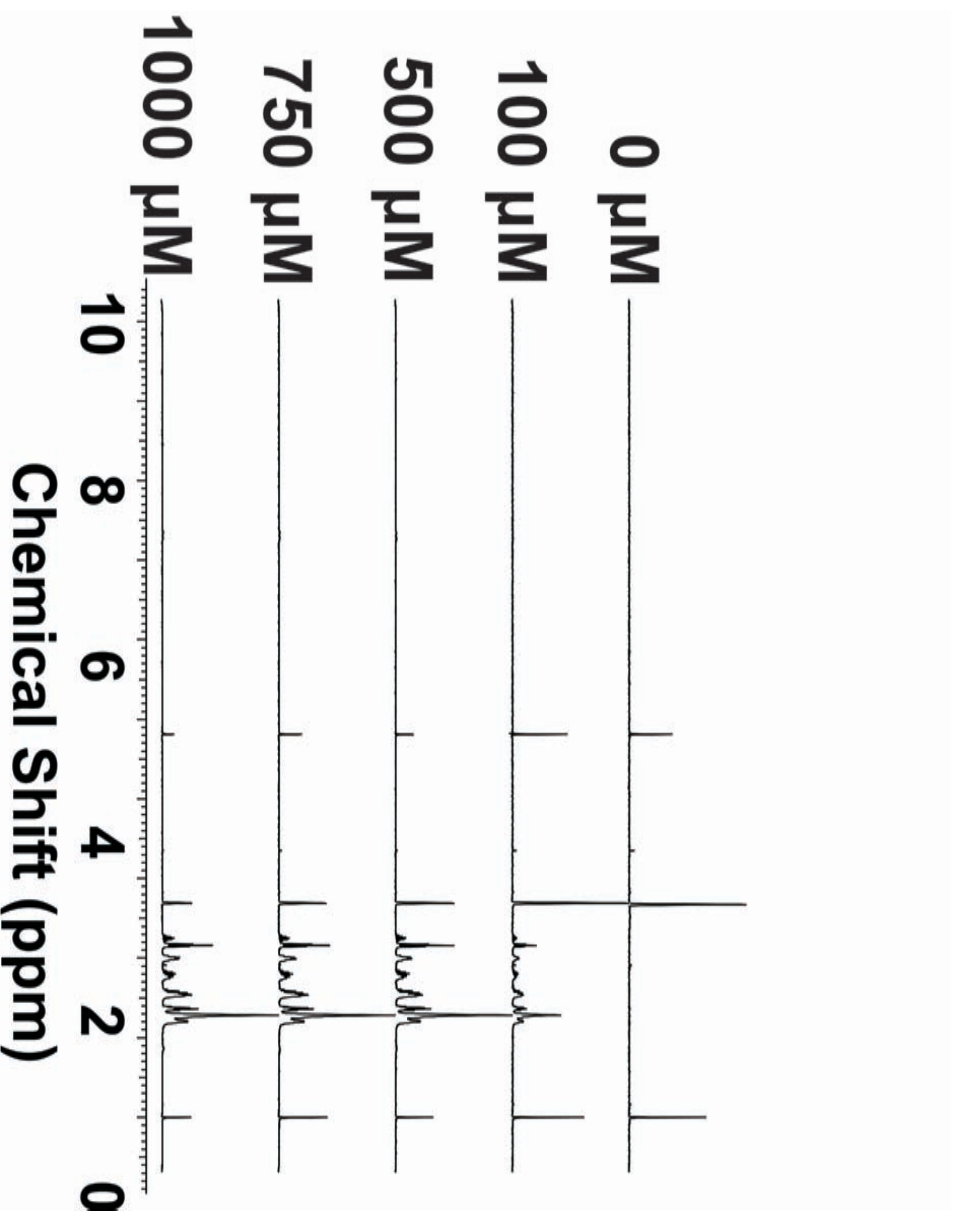

# Analog 4 (C<sub>10</sub> cyclobutanol); aggregation assay in phosphate buffer

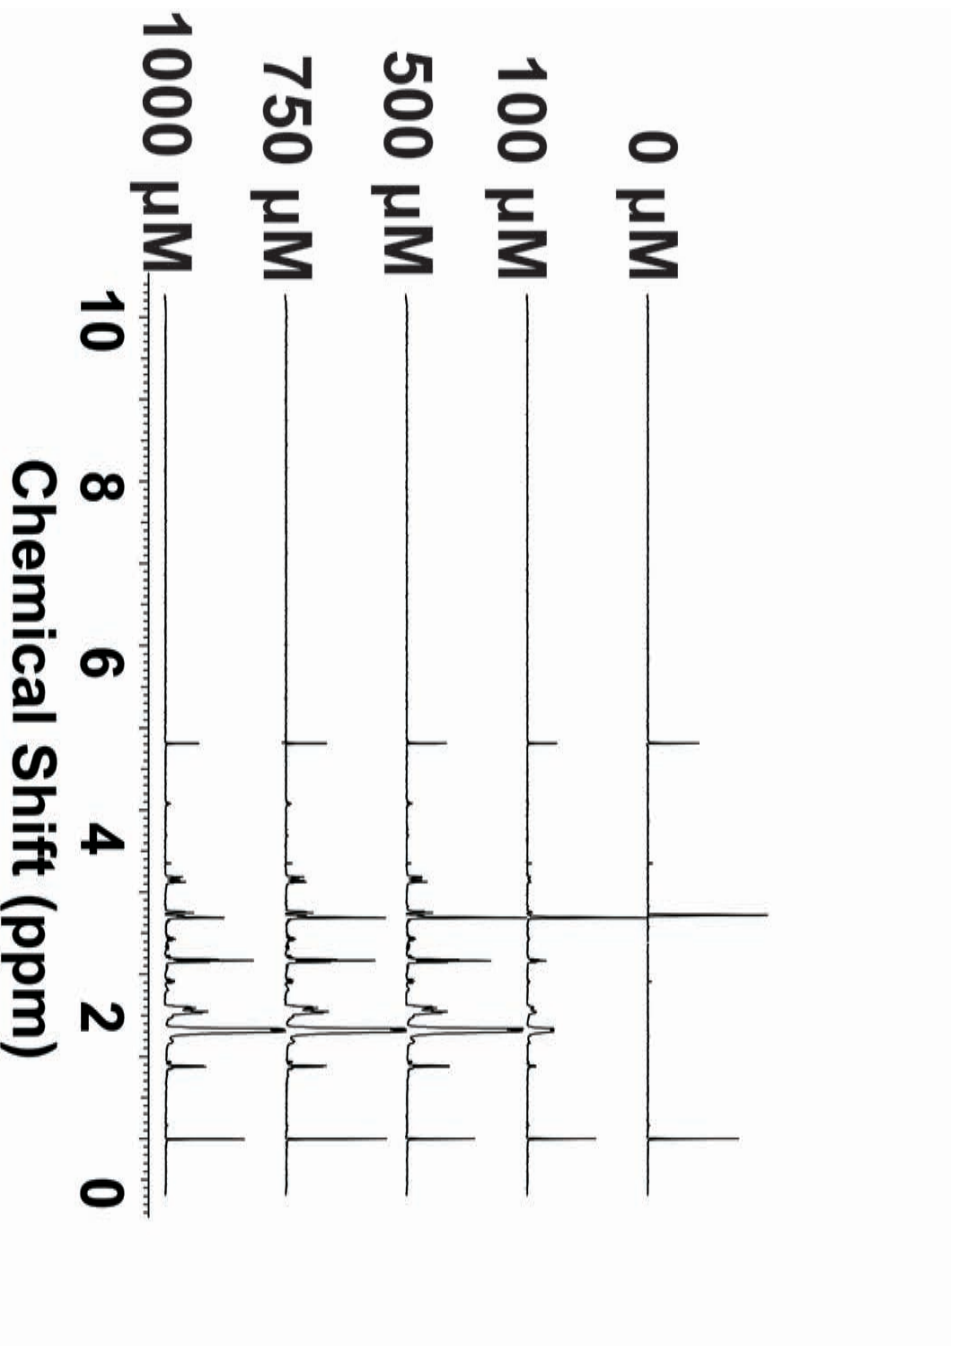

# Oleic acid: aggregation assay in phosphate buffer

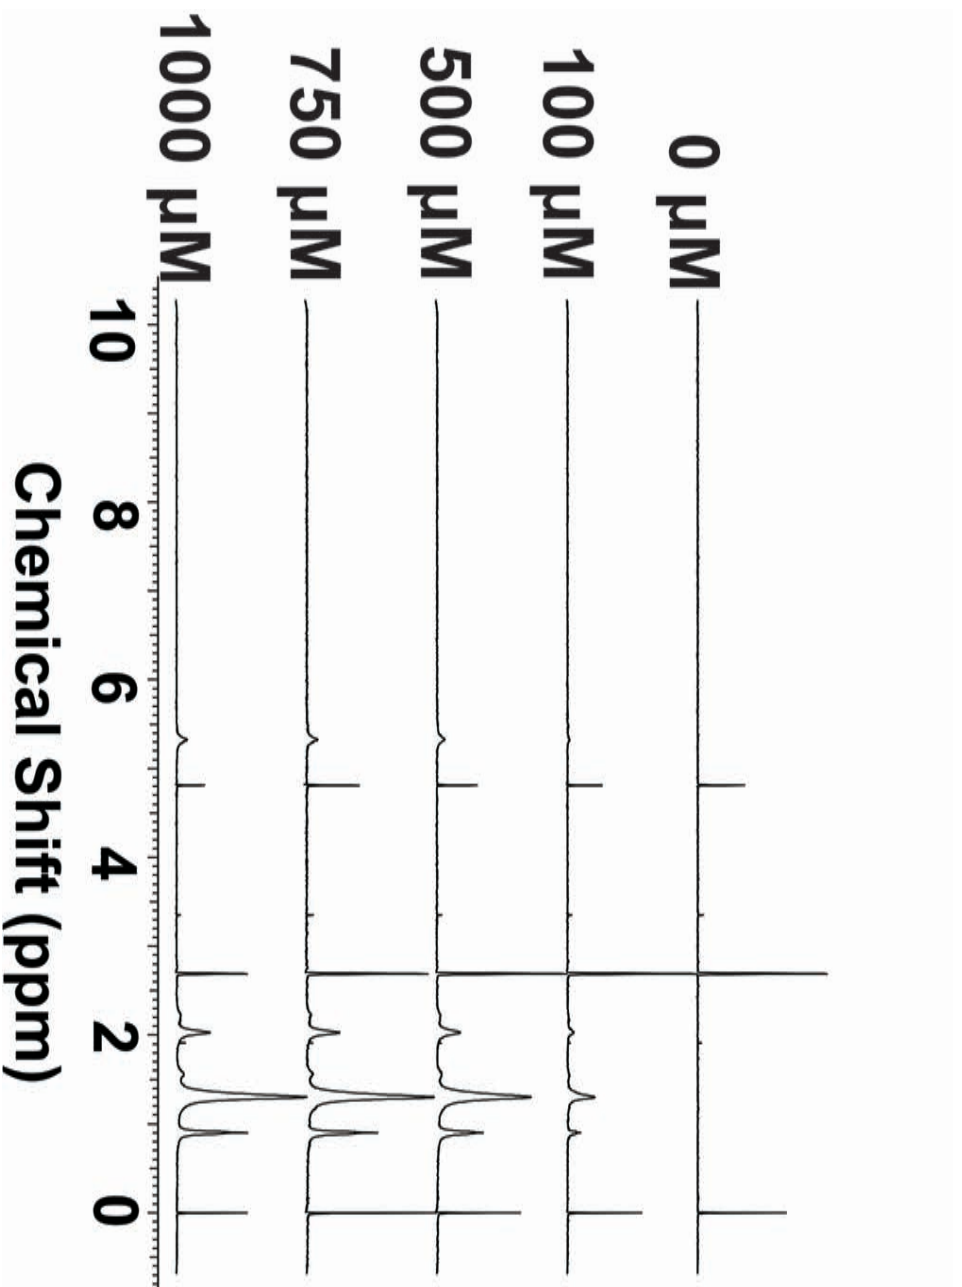

Analog 5 ( $C_{18}$  *cis*-cyclobutene); aggregation assay in phosphate buffer

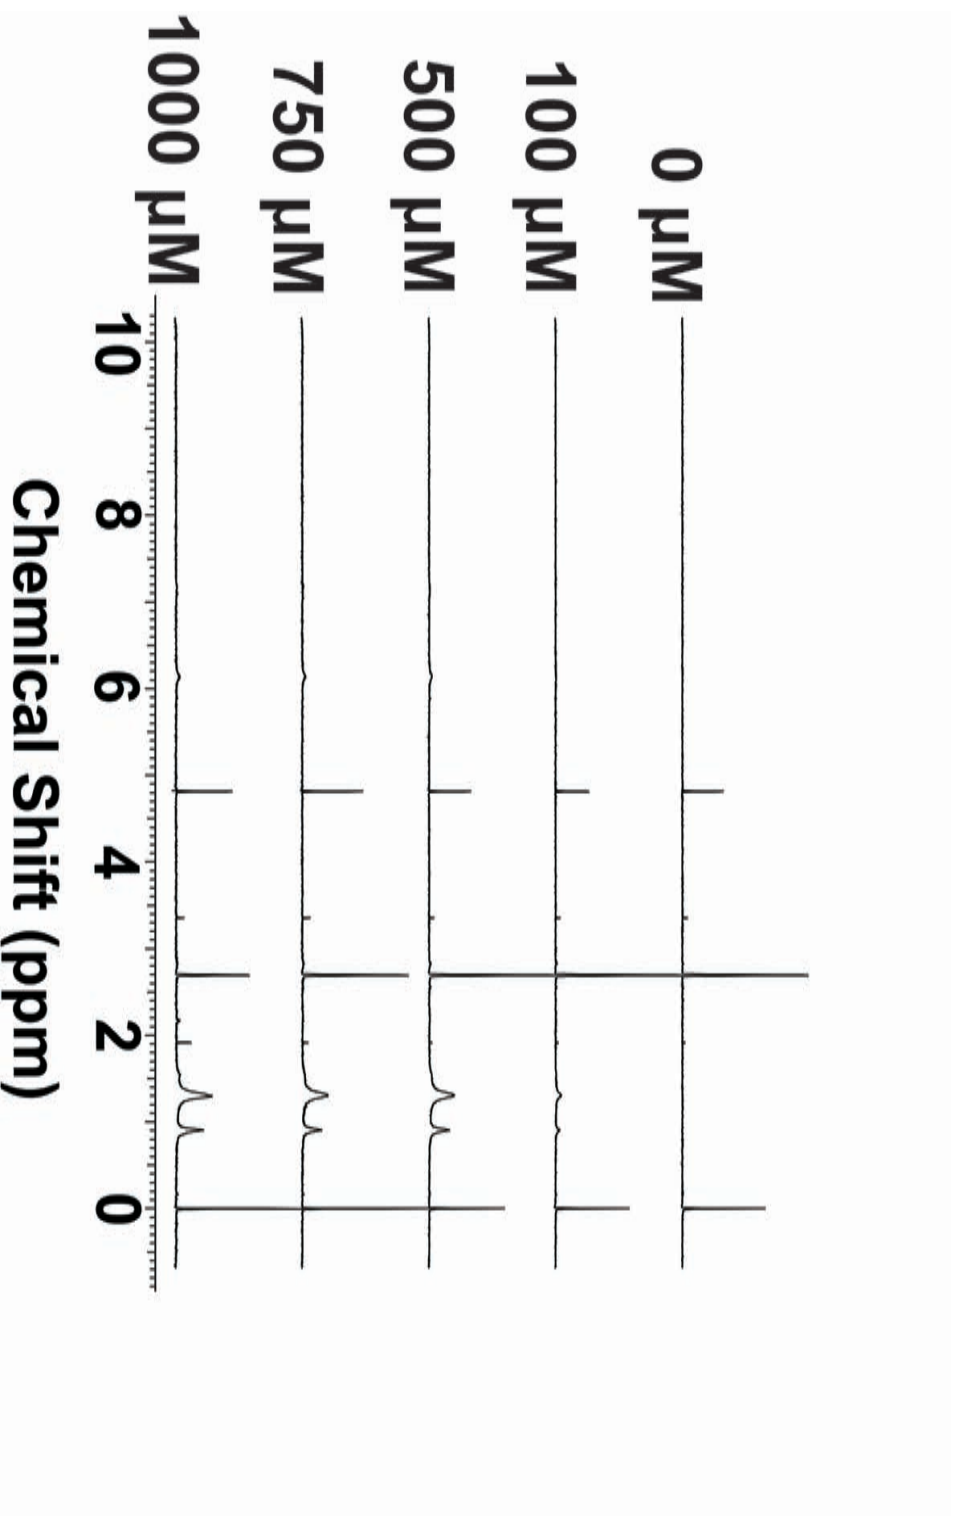



# Analog 7 ( $C_{18}$ *cis*-cyclobutanone); aggregation assay in phosphate buffer

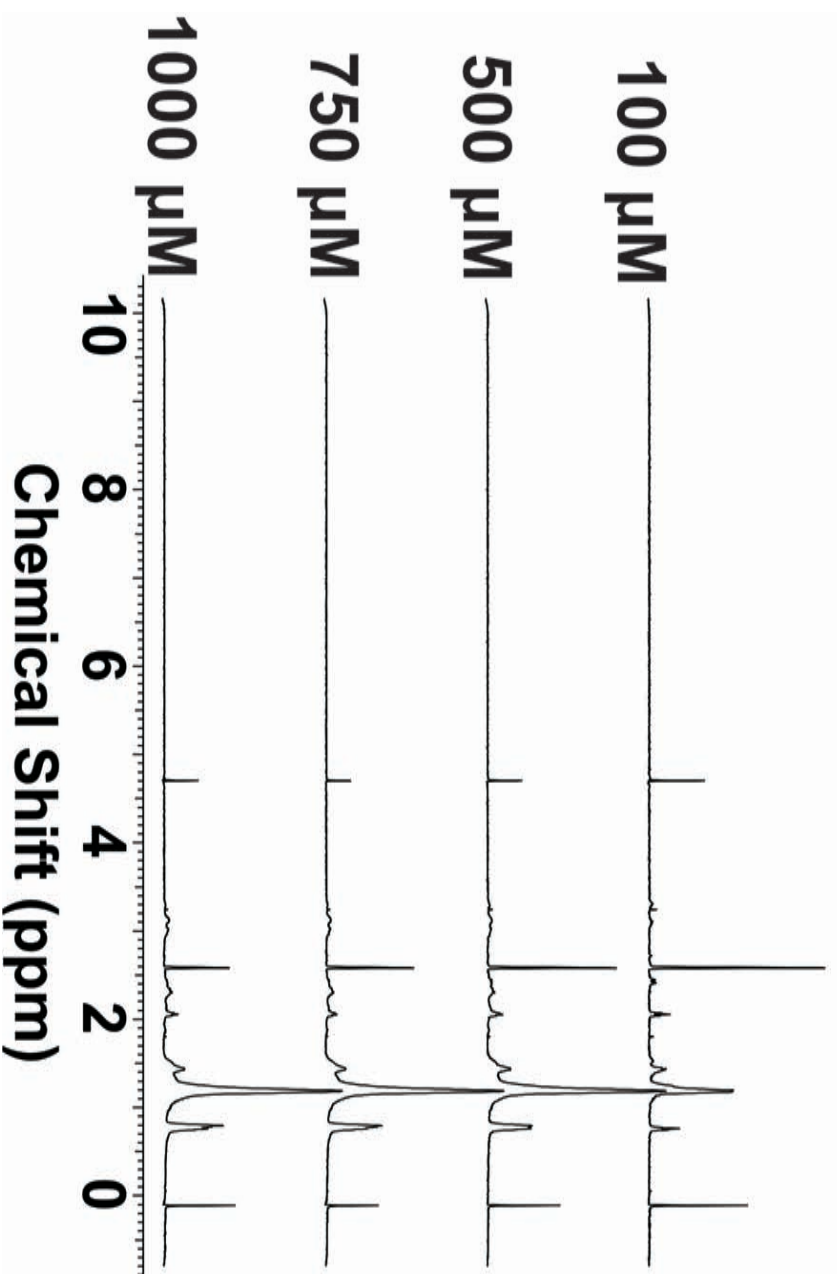

# Analog 8 (C<sub>18</sub> cyclobutanol); aggregation assay in phosphate buffer

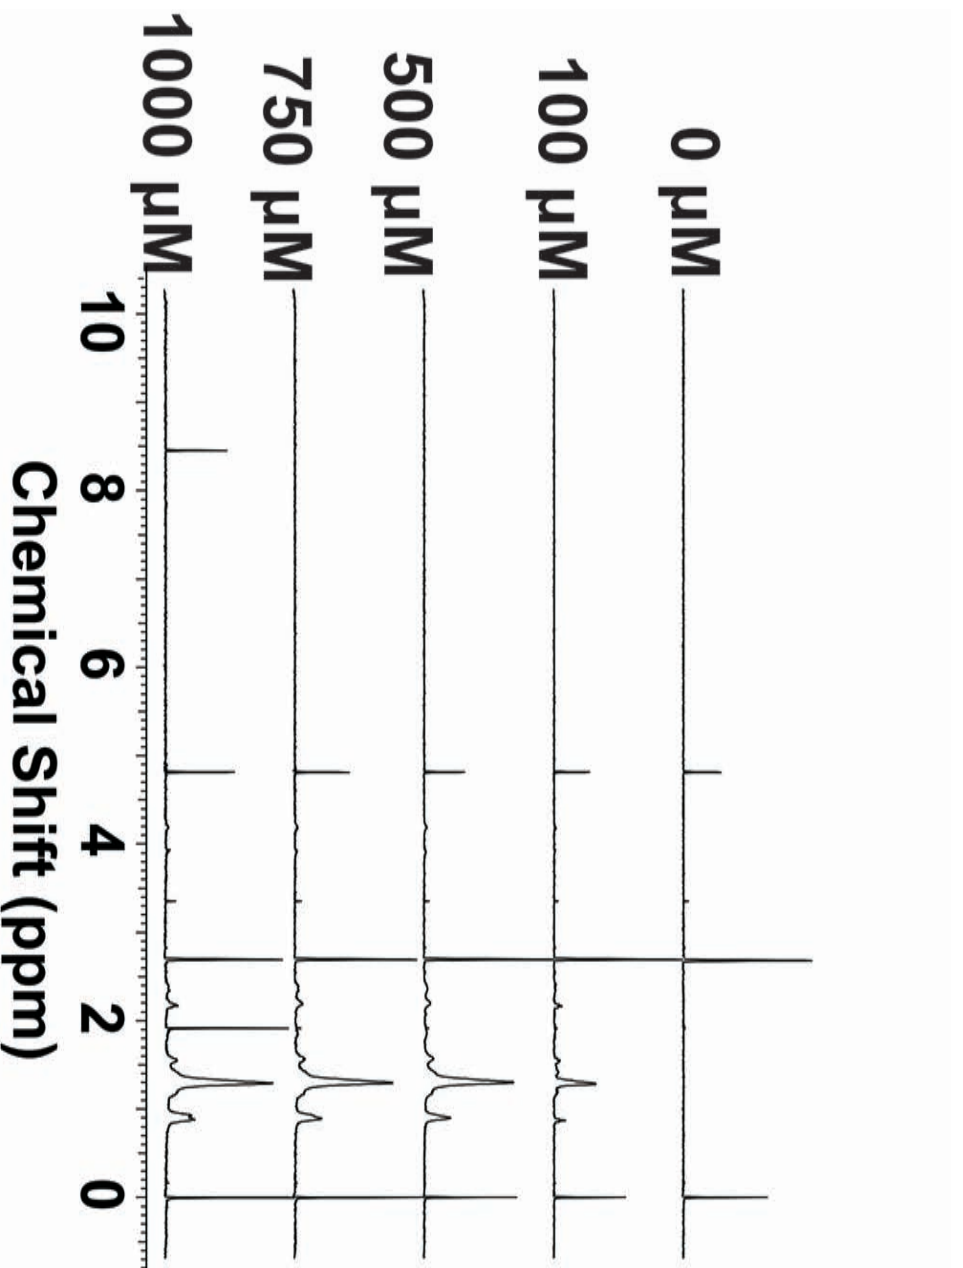

Analog **9** ( $C_{18}$  *cis*-chlorocyclobutanone); aggregation assay in phosphate buffer

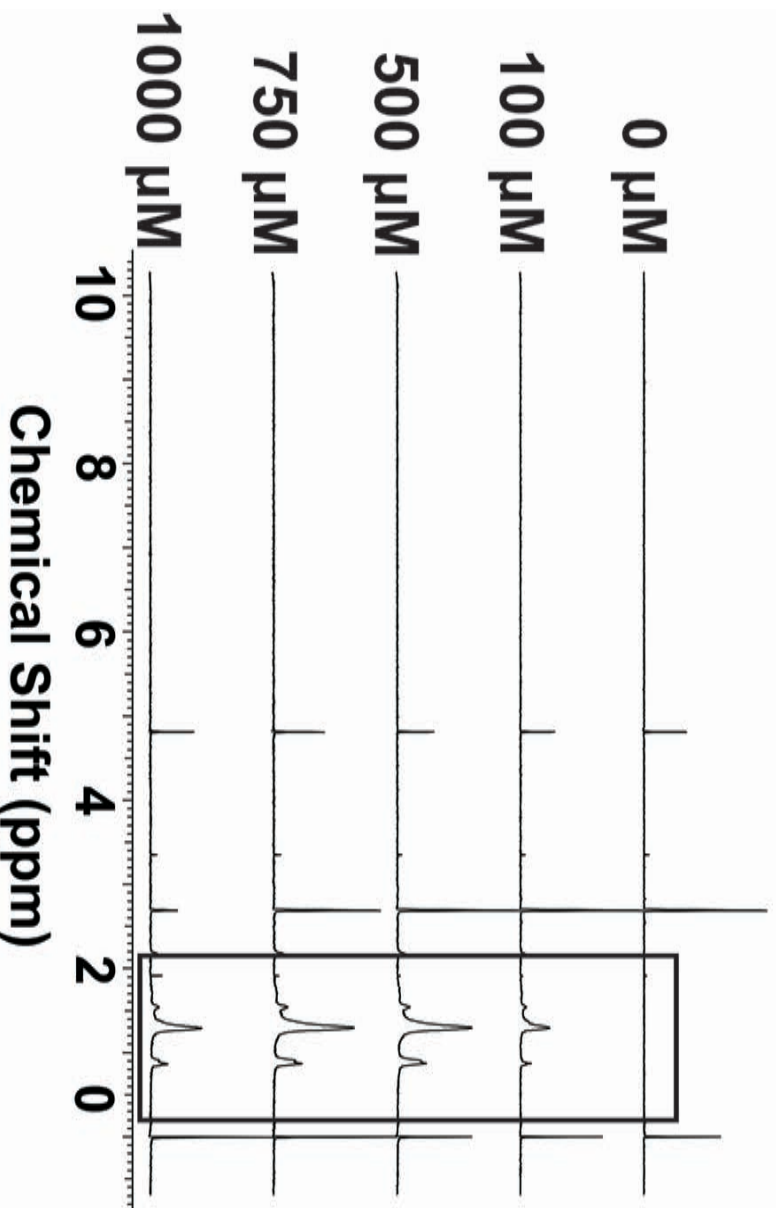

Analog **10** ( $C_{18}$  *trans*-cyclobutene); aggregation assay in phosphate buffer

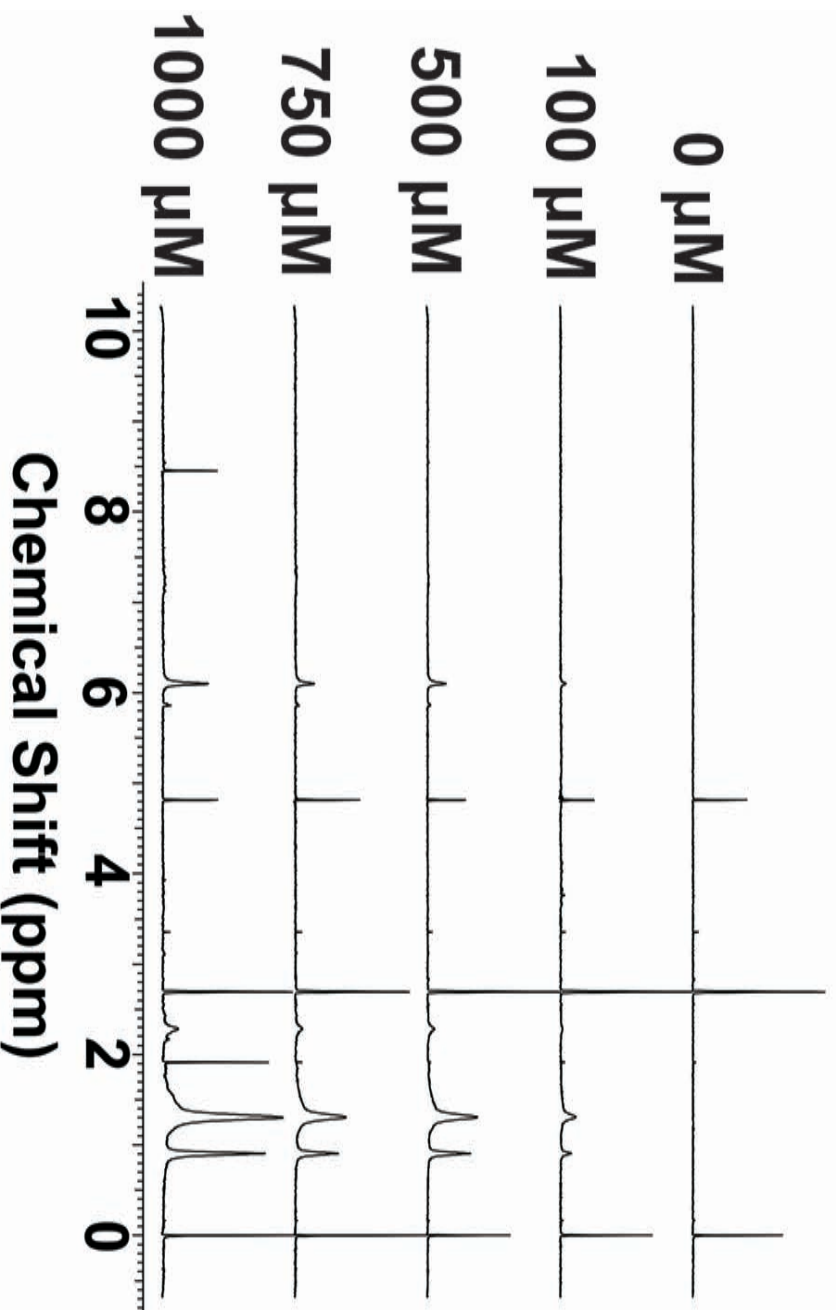

# Analog 11 ( $C_{18}$ *trans*-chloroketone); aggregation assay in phosphate buffer

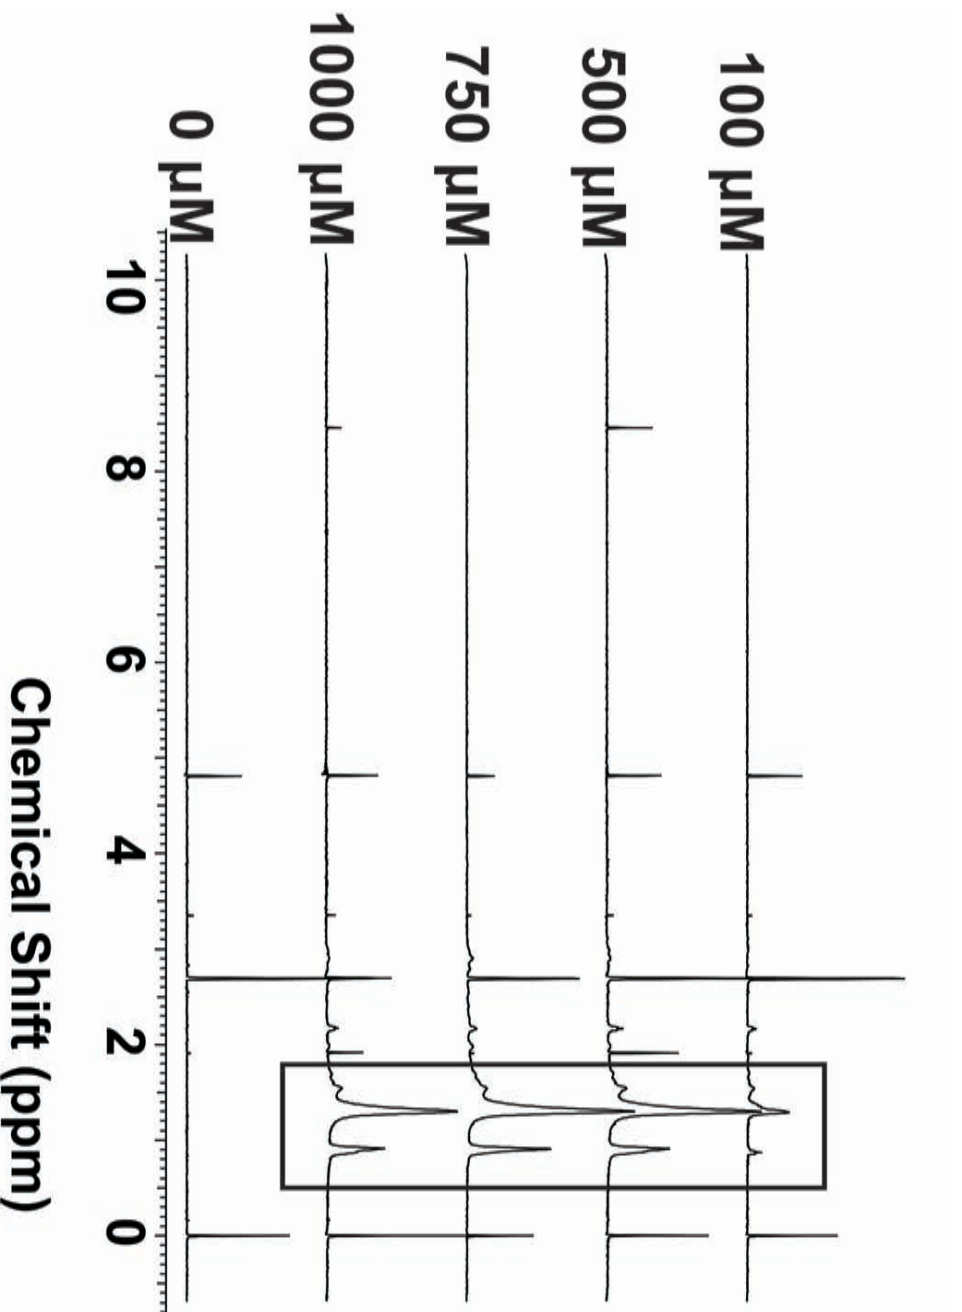

## References

---

<sup>1</sup> J. J. Li, C. Limberakis, D. A. Pflum, *Modern Organic Synthesis in the Laboratory: A Collection of Standard Experimental Procedures*, Oxford University Press, New York, **2007**, p 45.

<sup>2</sup> B. Neises, W. Steglich, *Angew. Chem. Int. Ed.* **1978**, *17*, 522–524. Previous report: E. G. Maleeva, *Zhurnal Obshchei Khimii* **1953**, *23*, 1662–1664; K. Murai, G. J. Akazome, *Jpn Oil Chem. Soc.* **1955**, *4*, 125–127. (no detail for preparation)

<sup>3</sup> E. G. Maleeva, *Zhurnal Obshchei Khimii.* **1953**, *23*, 1662–1664 [*Chem. Abstr.* **1954**, *48*, 77506].

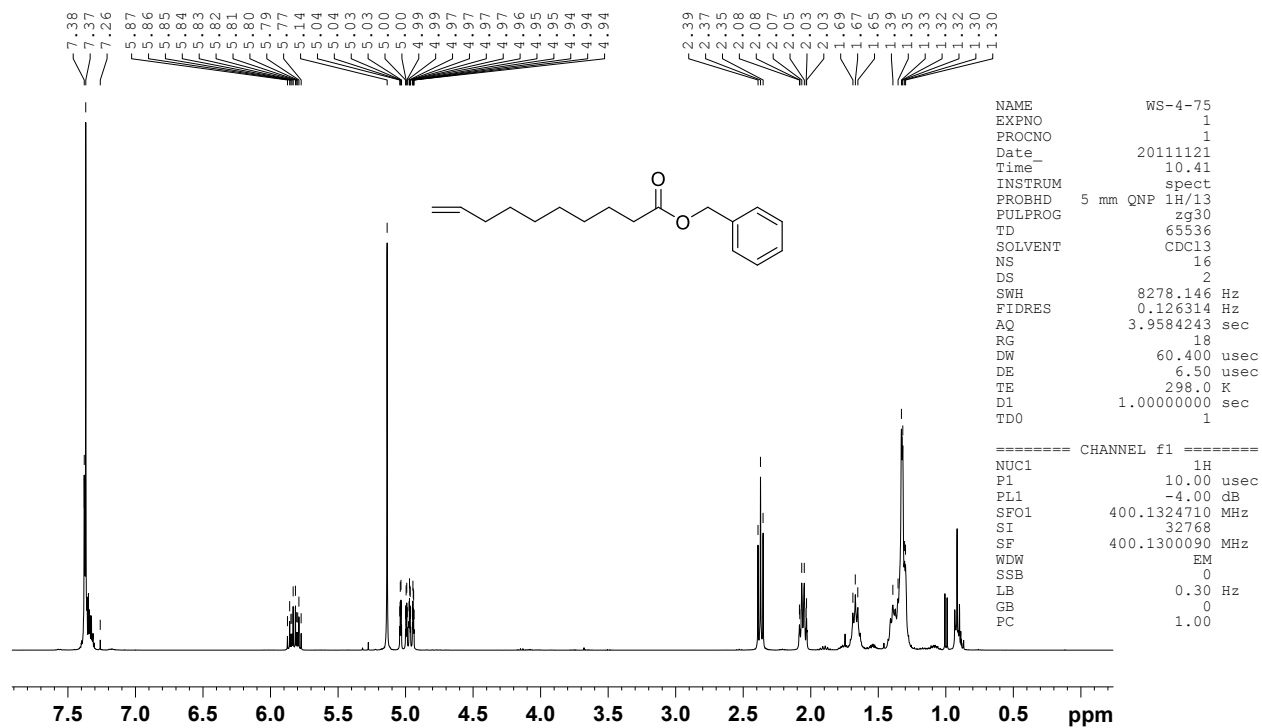

Figure S1.1. <sup>1</sup>H-NMR (400 MHz, chloroform-*d*) spectrum.

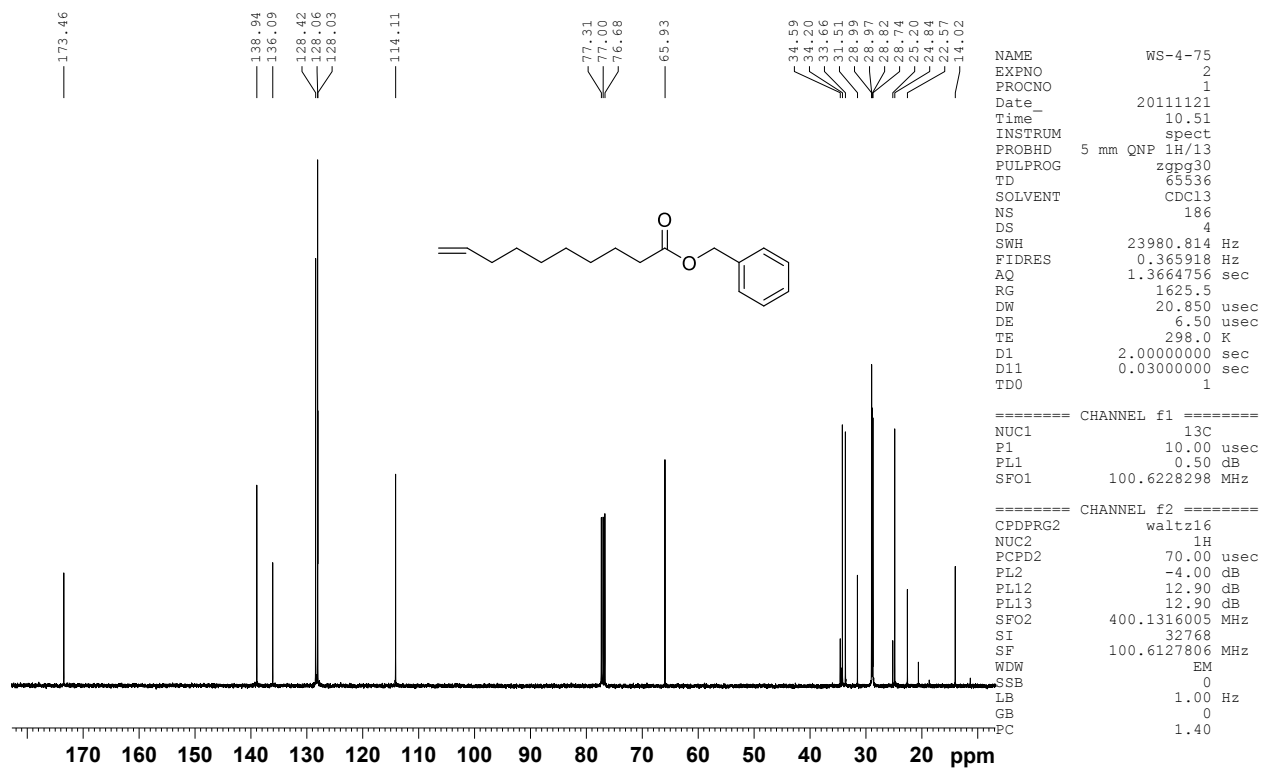

Figure S1.2. <sup>13</sup>C-NMR (100 MHz, chloroform-*d*) spectrum.

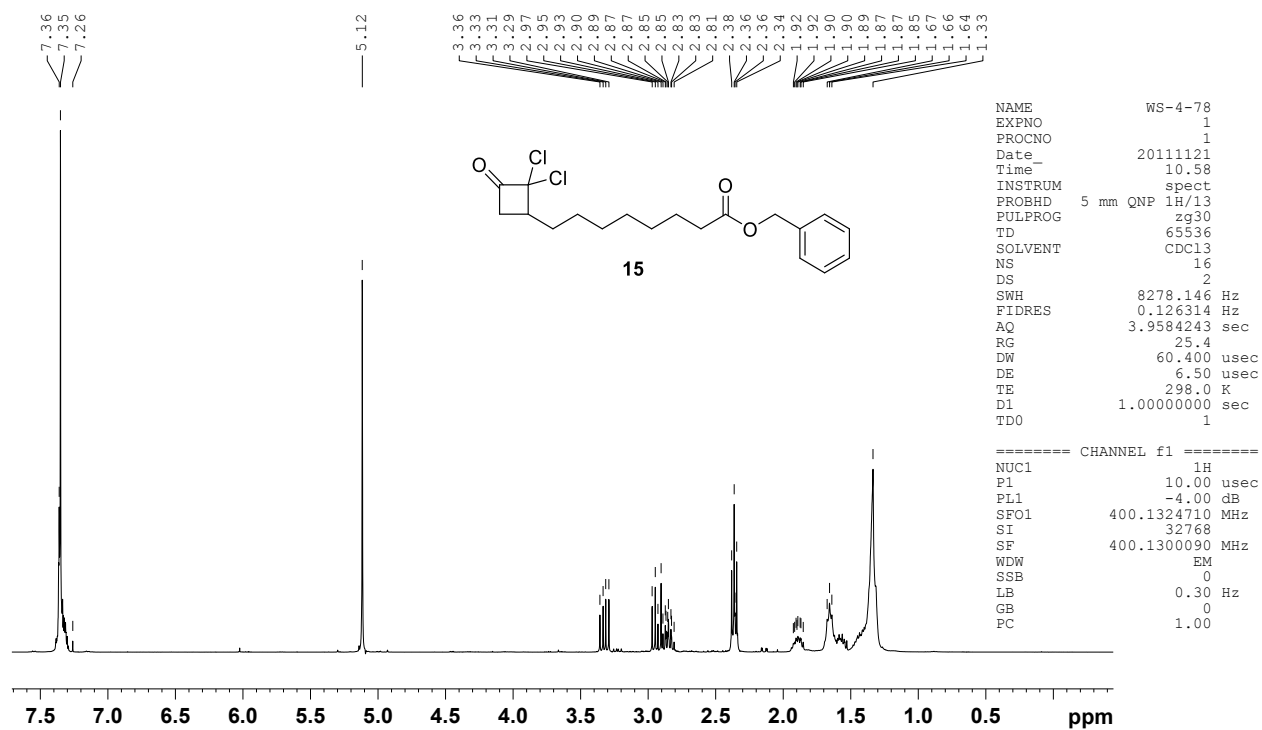

**Figure S2.1.** <sup>1</sup>H-NMR (400 MHz, chloroform-*d*) spectrum of **15**.

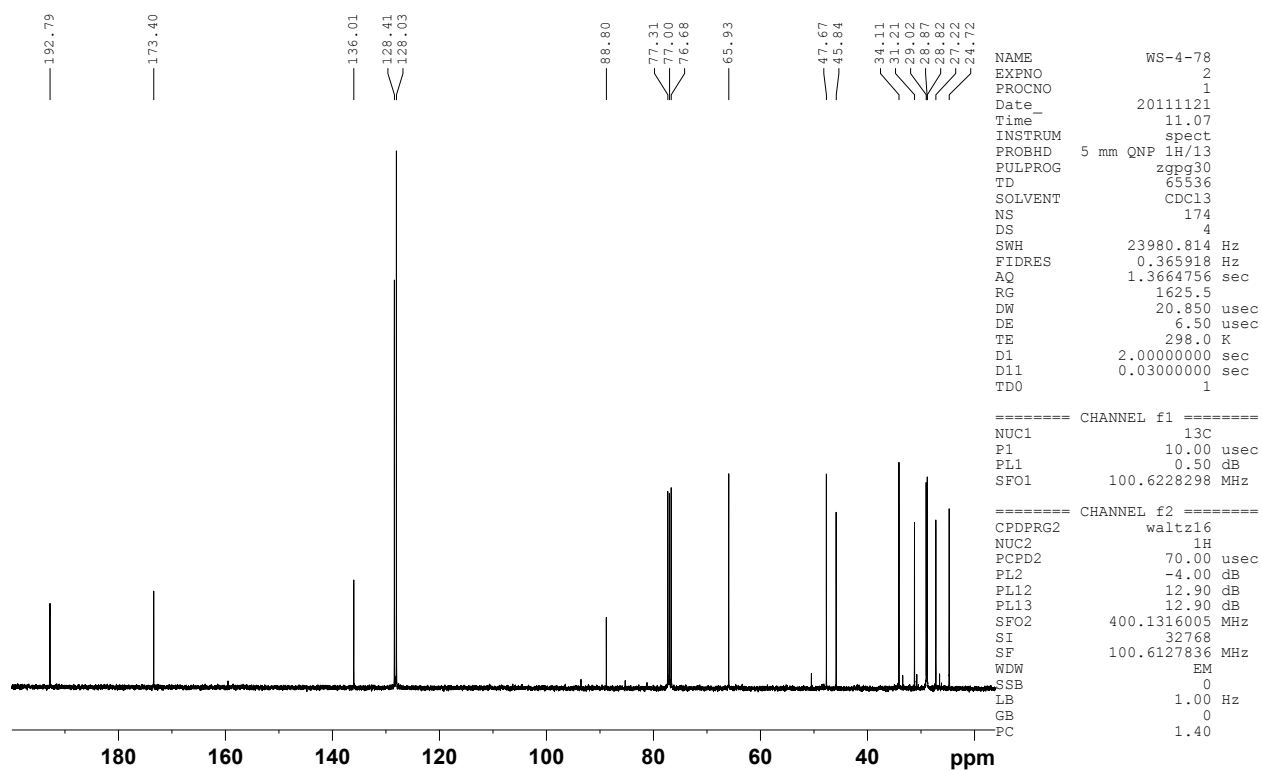

**Figure S2.2.** <sup>13</sup>C-NMR (100 MHz, chloroform-*d*) spectrum of **15**.



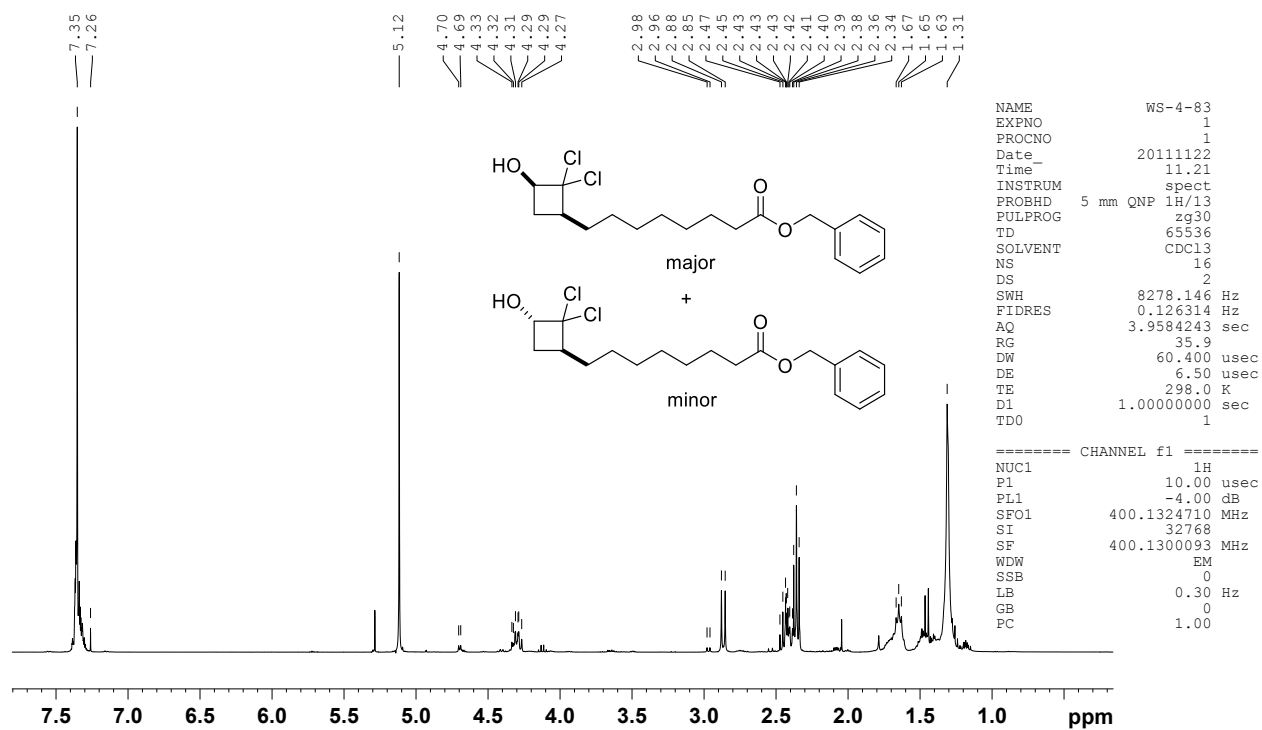

Figure S3.1. <sup>1</sup>H-NMR (400 MHz, chloroform-*d*) spectrum.

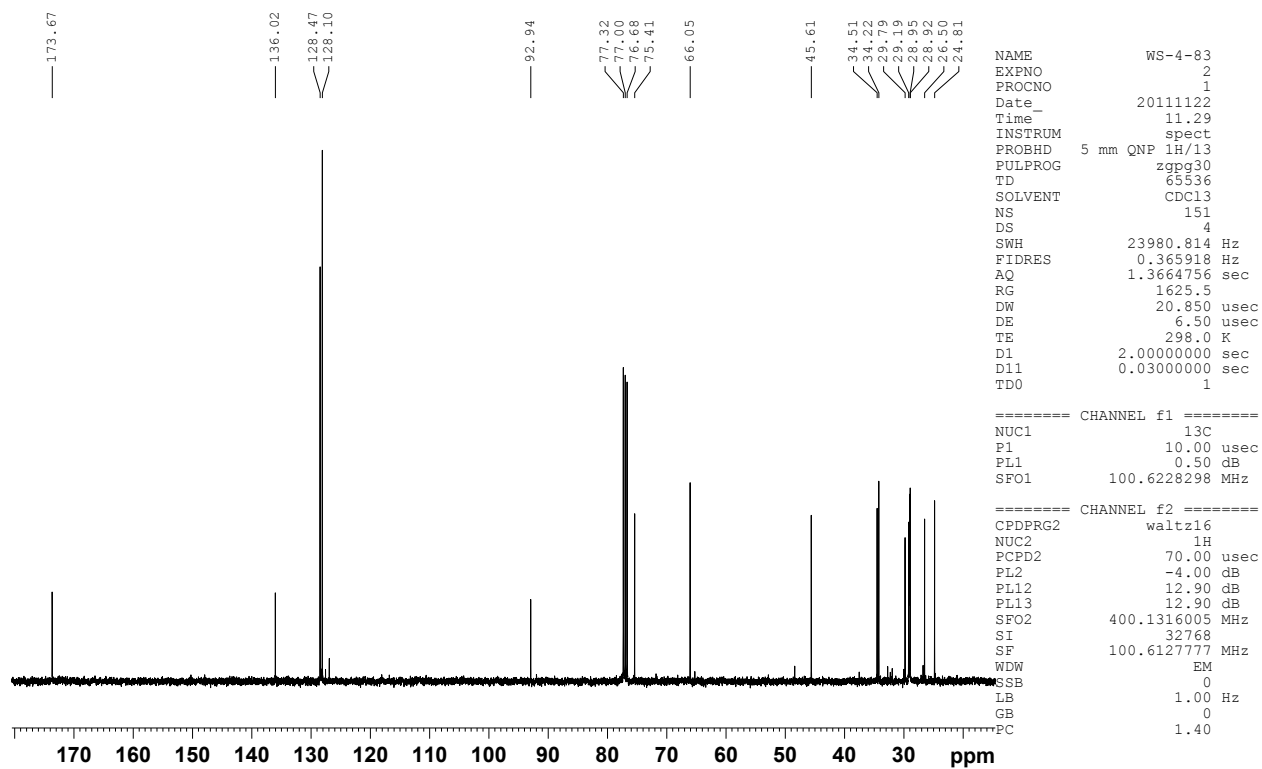

Figure S3.2. <sup>13</sup>C-NMR (100 MHz, chloroform-*d*) spectrum.

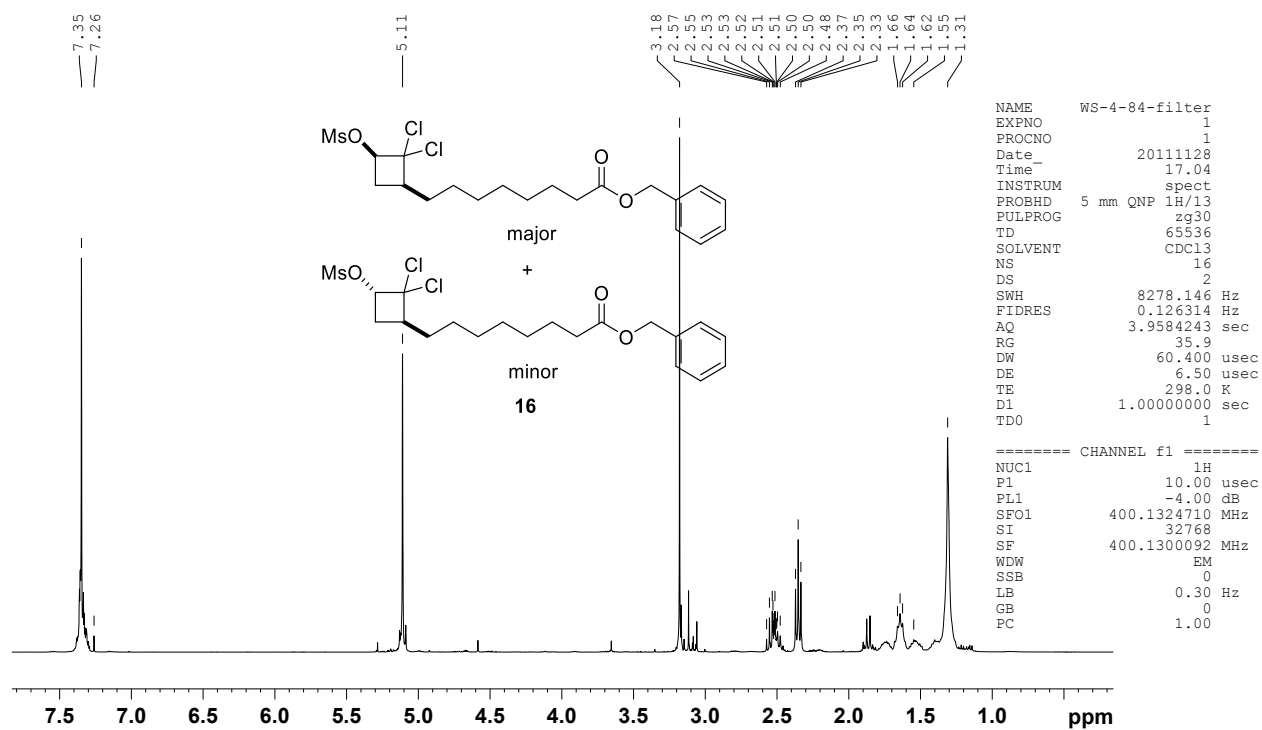

Figure S4.1. <sup>1</sup>H-NMR (400 MHz, chloroform-*d*) spectrum of **16**.

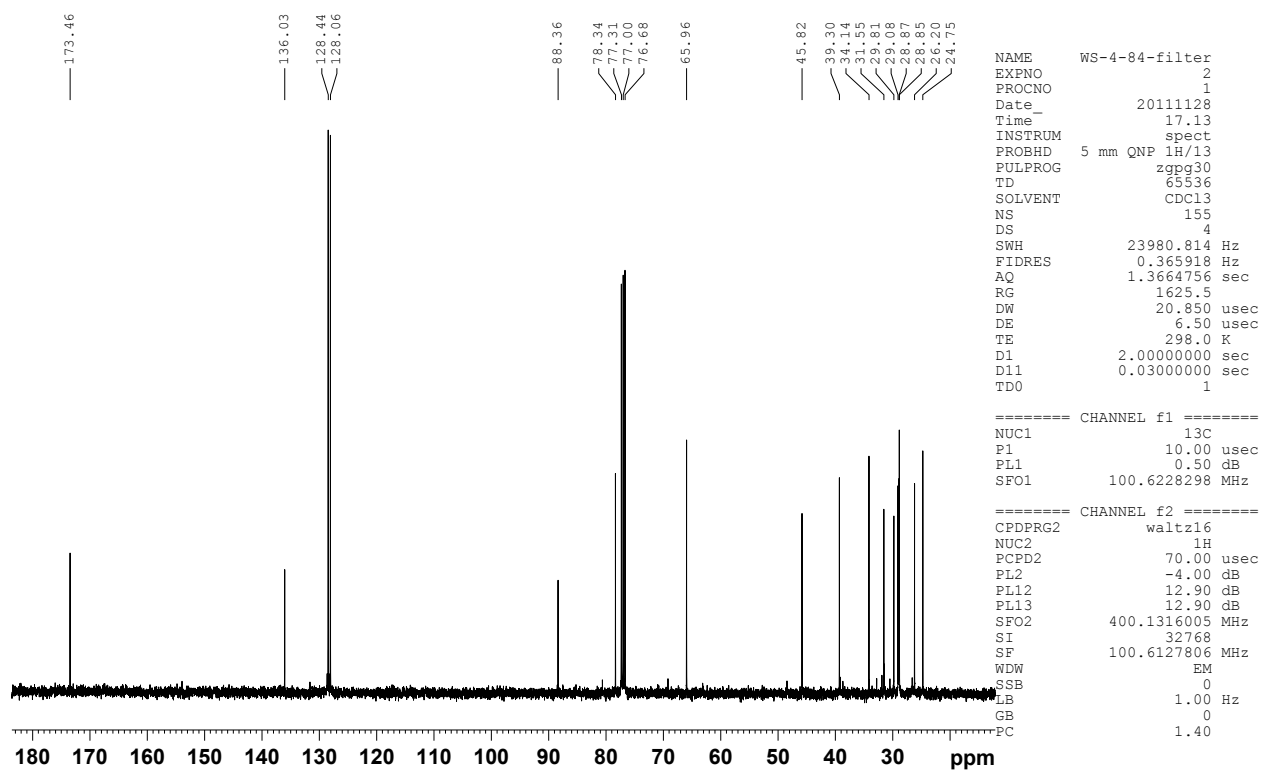

Figure S4.2. <sup>13</sup>C-NMR (100 MHz, chloroform-*d*) spectrum of **16**.

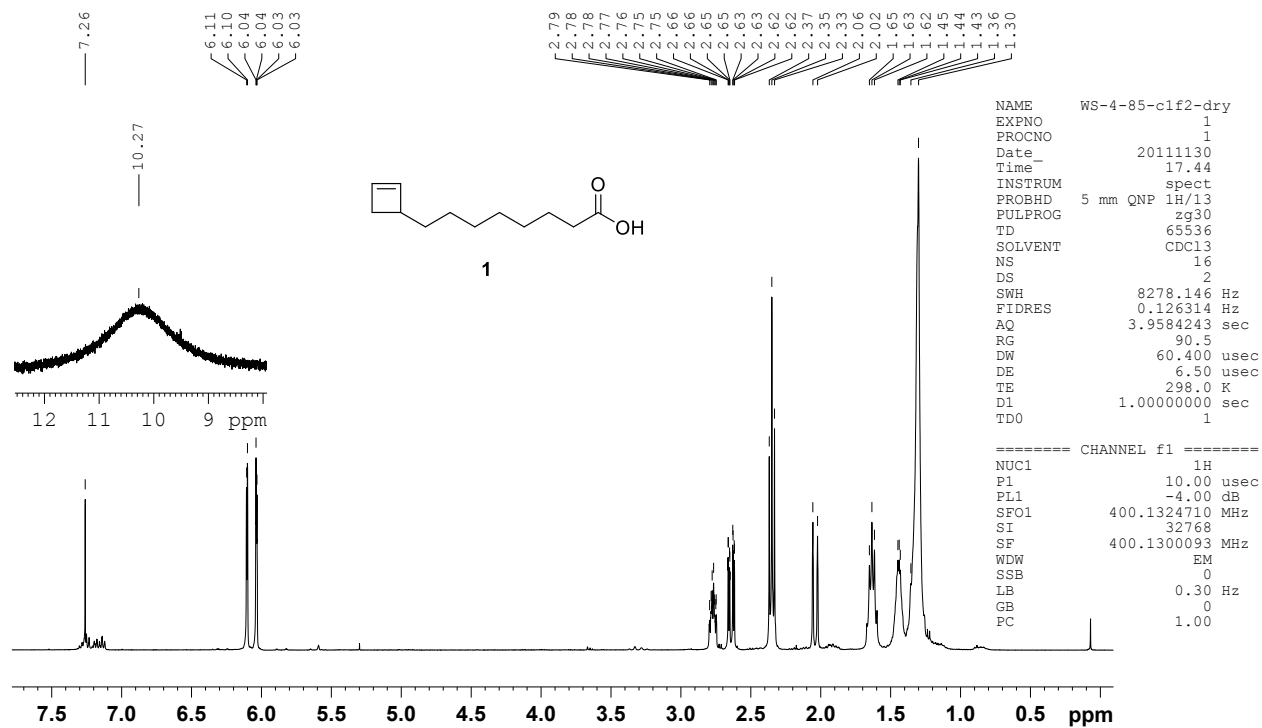

Figure S5.1. <sup>1</sup>H-NMR (400 MHz, chloroform-*d*) spectrum of **1**.

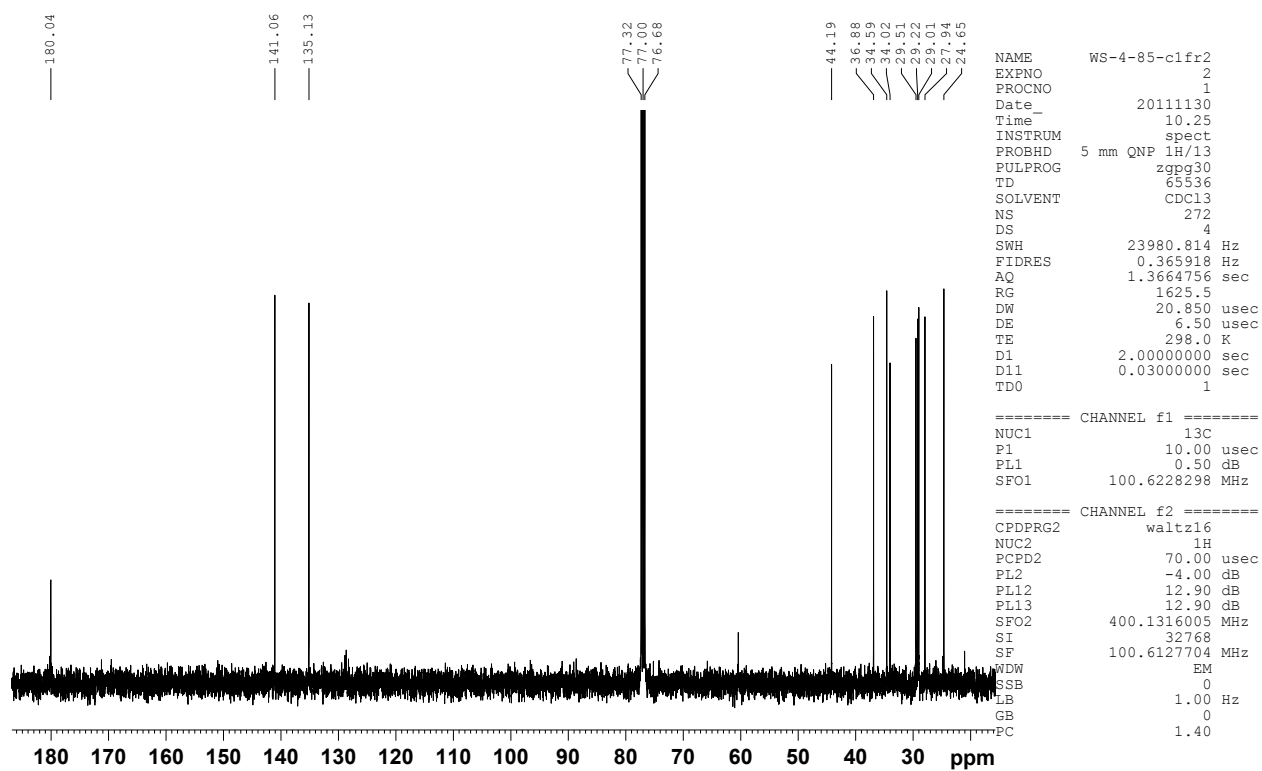

Figure S5.2. <sup>13</sup>C-NMR (100 MHz, chloroform-*d*) spectrum of **1**.

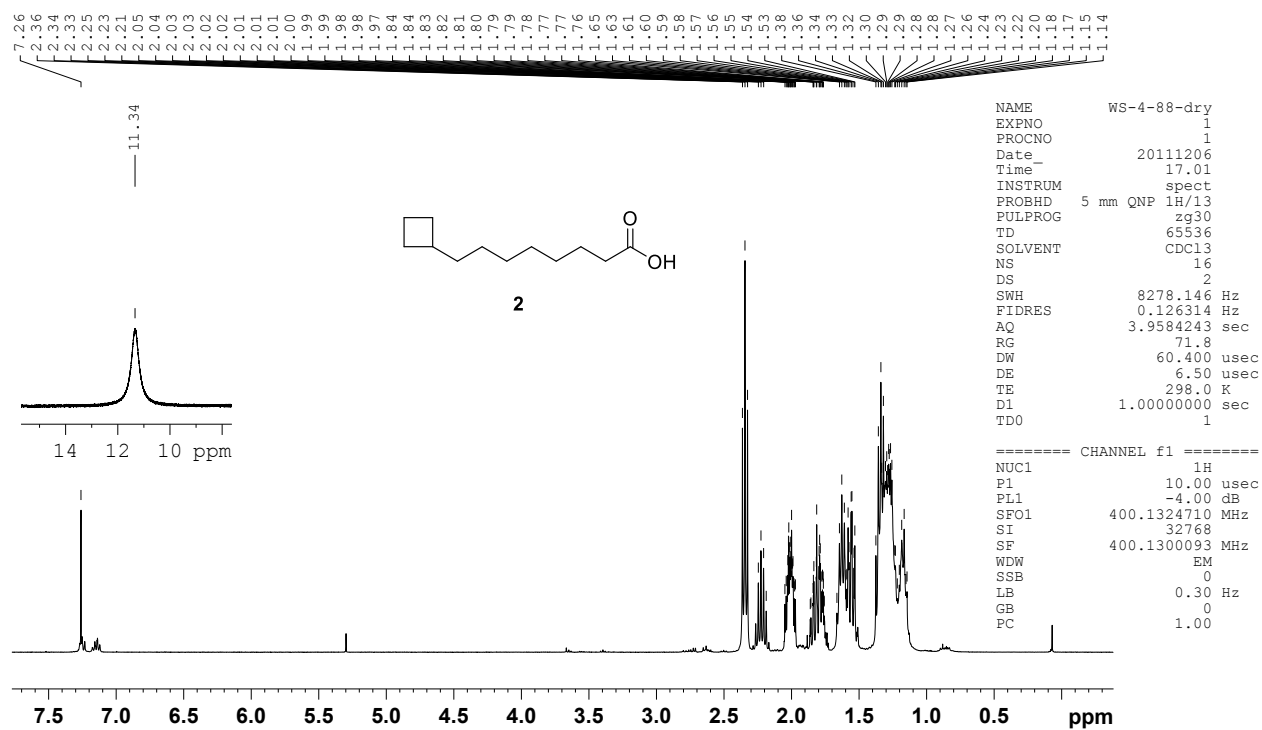

**Figure S6.1.** <sup>1</sup>H-NMR (400 MHz, chloroform-*d*) spectrum of **2**.

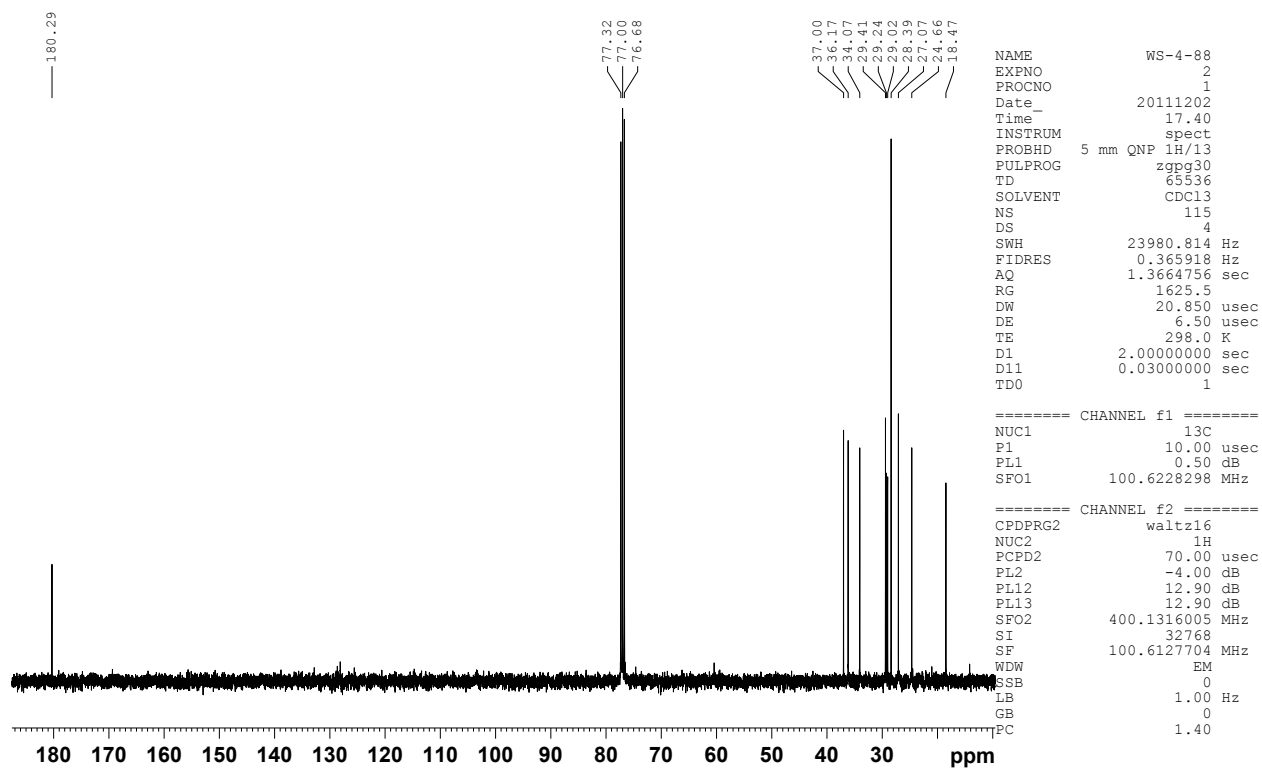

**Figure S6.2.** <sup>13</sup>C-NMR (100 MHz, chloroform-*d*) spectrum of **2**.

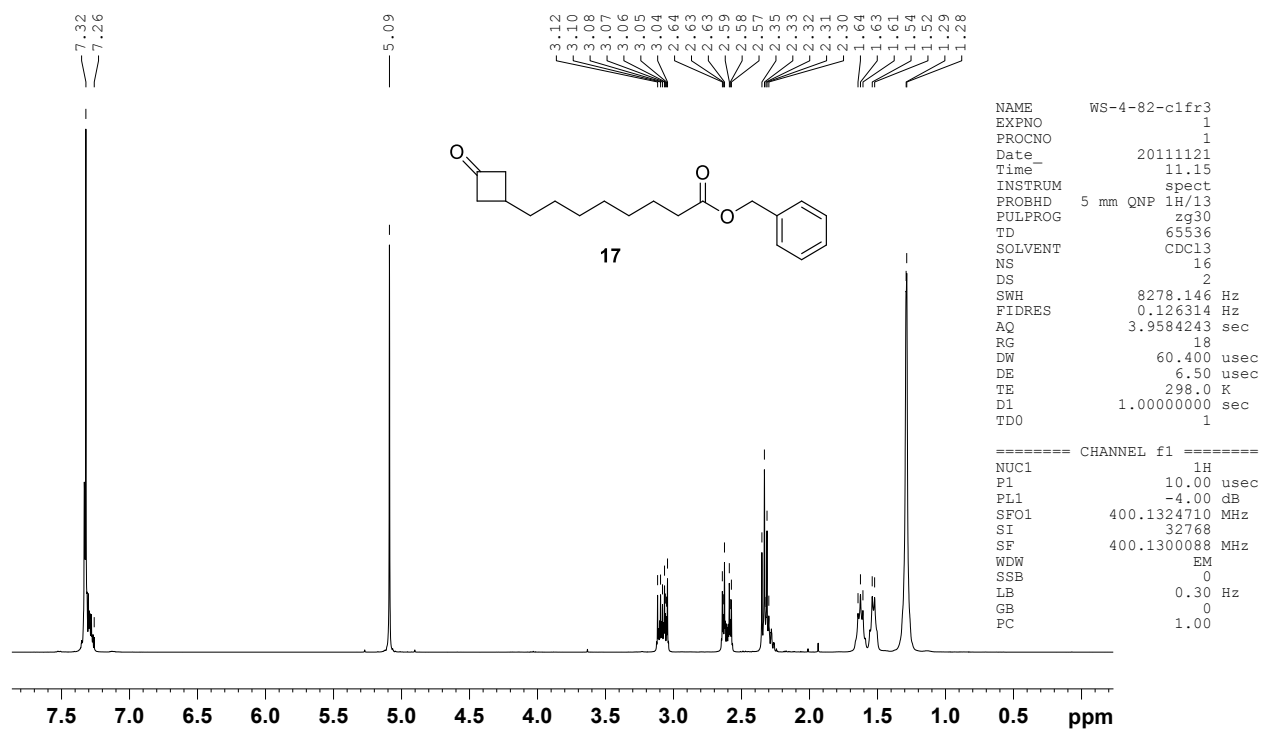

Figure S7.1. <sup>1</sup>H-NMR (400 MHz, chloroform-*d*) spectrum of **17**.

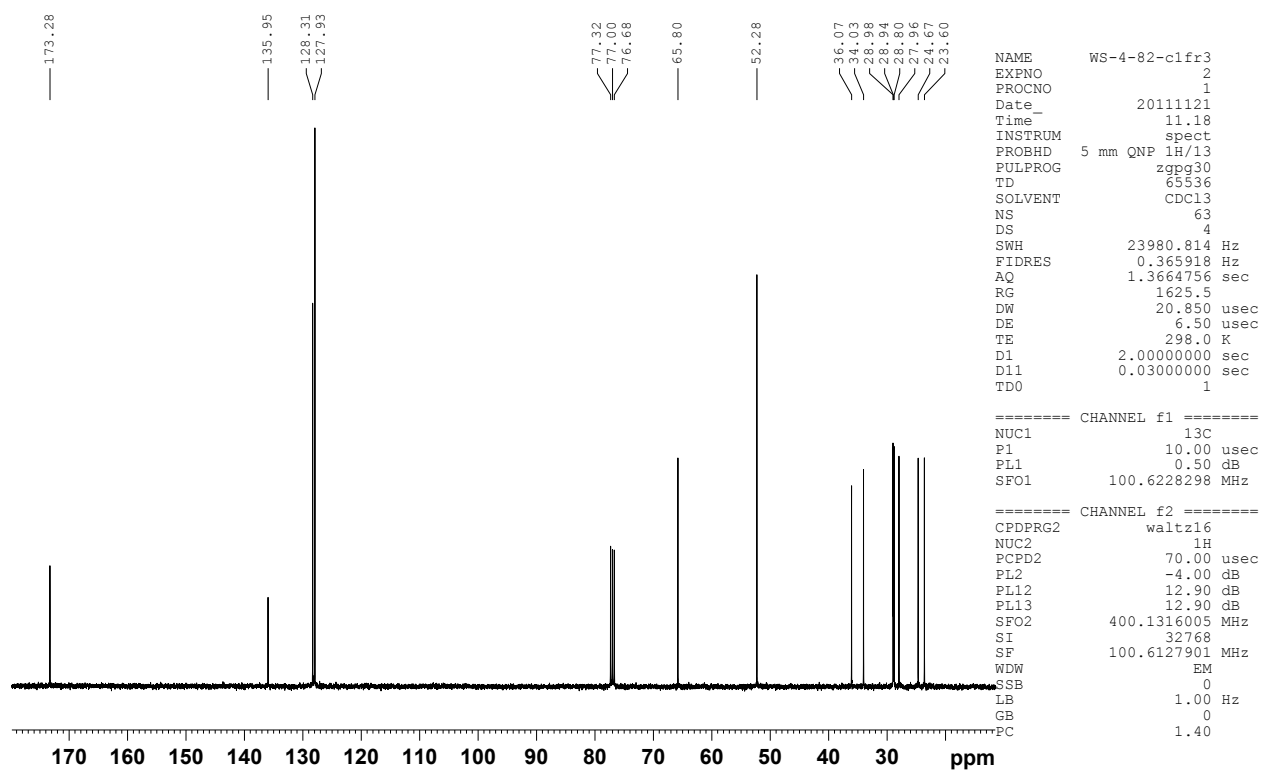

Figure S7.2. <sup>13</sup>C-NMR (100 MHz, chloroform-*d*) spectrum of **17**.

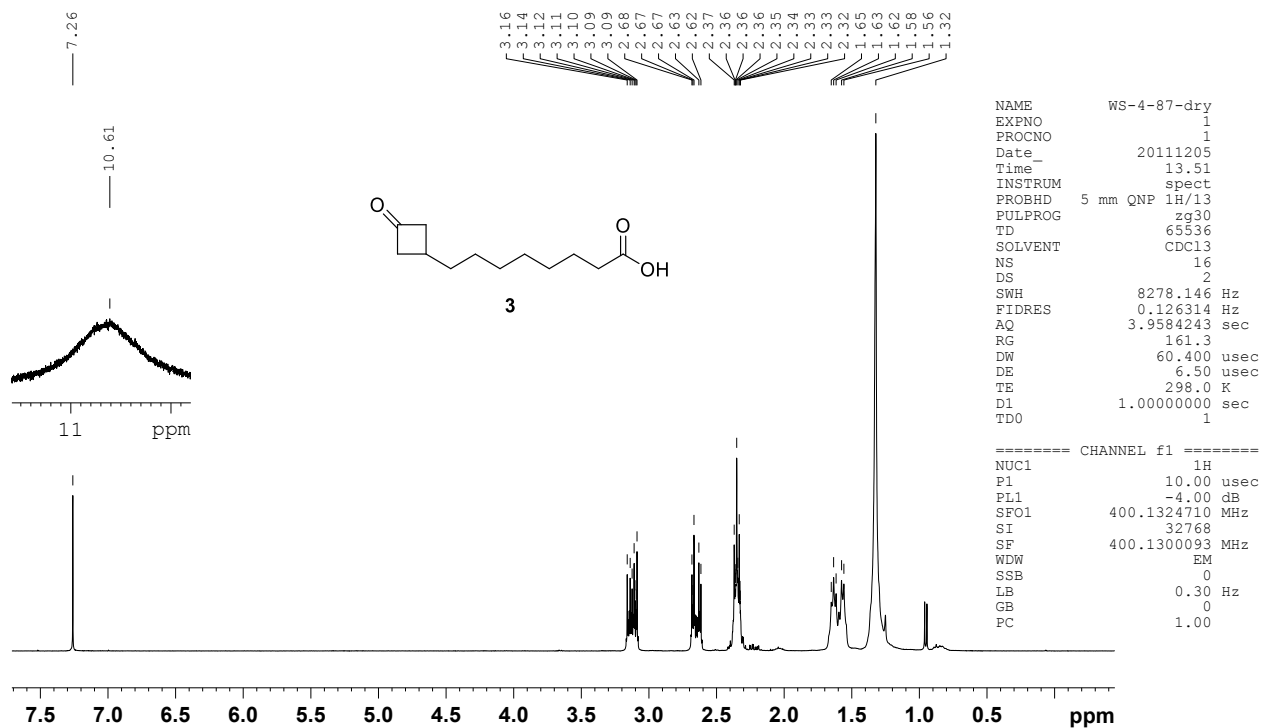

Figure S8.1. <sup>1</sup>H-NMR (400 MHz, chloroform-*d*) spectrum of **3**.

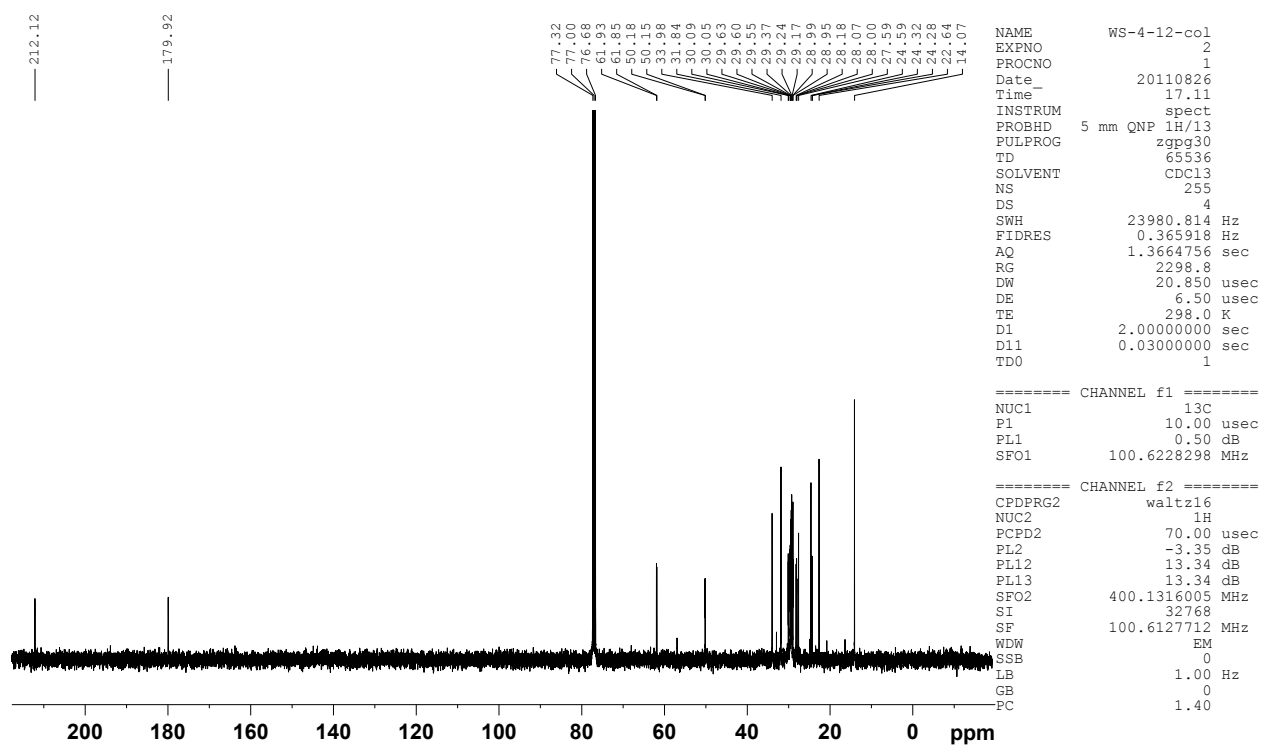

Figure S8.2. <sup>13</sup>C-NMR (100 MHz, chloroform-*d*) spectrum of **3**.

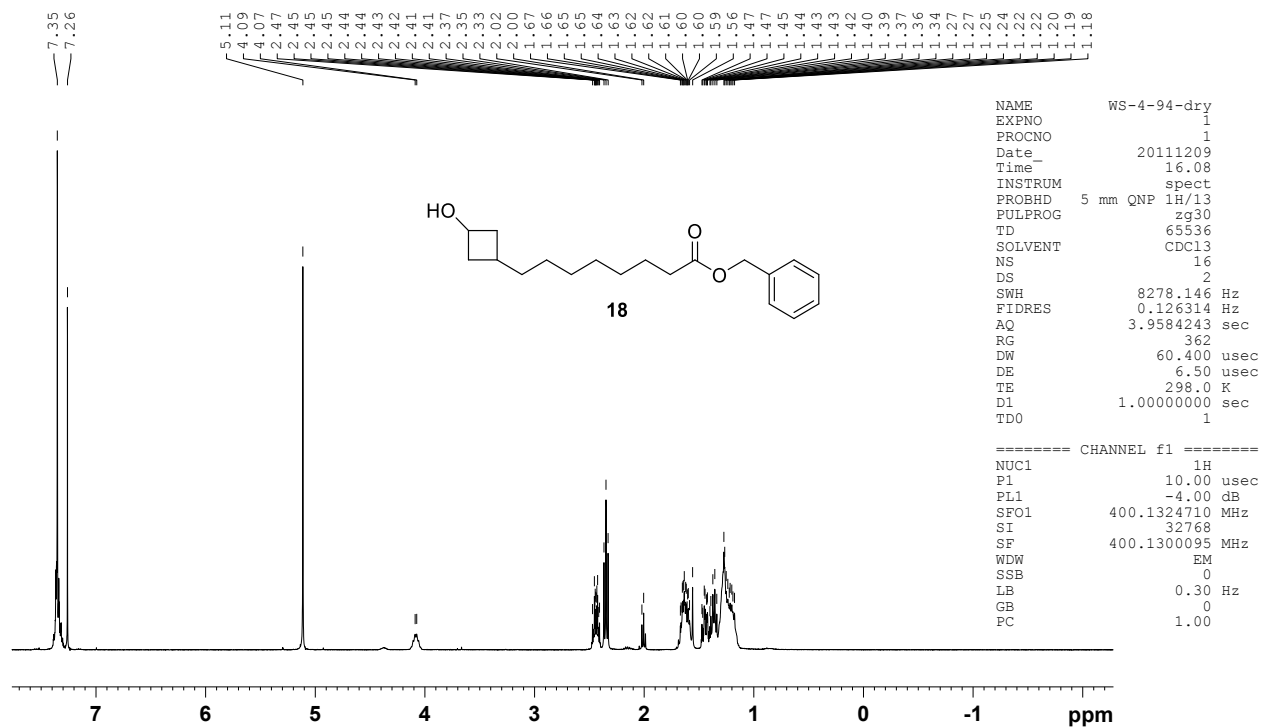

Figure S9.1. <sup>1</sup>H-NMR (400 MHz, chloroform-*d*) spectrum of **18**.

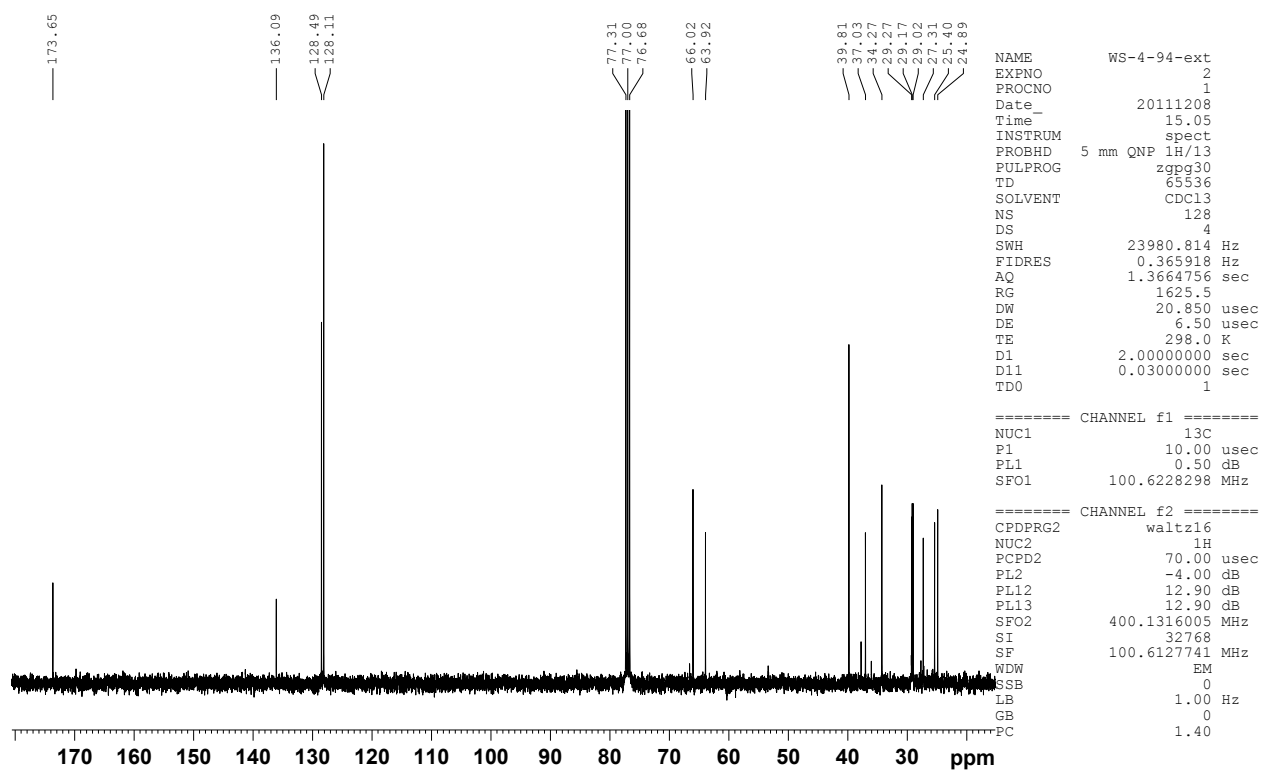

Figure S9.2. <sup>13</sup>C-NMR (100 MHz, chloroform-*d*) spectrum of **18**.

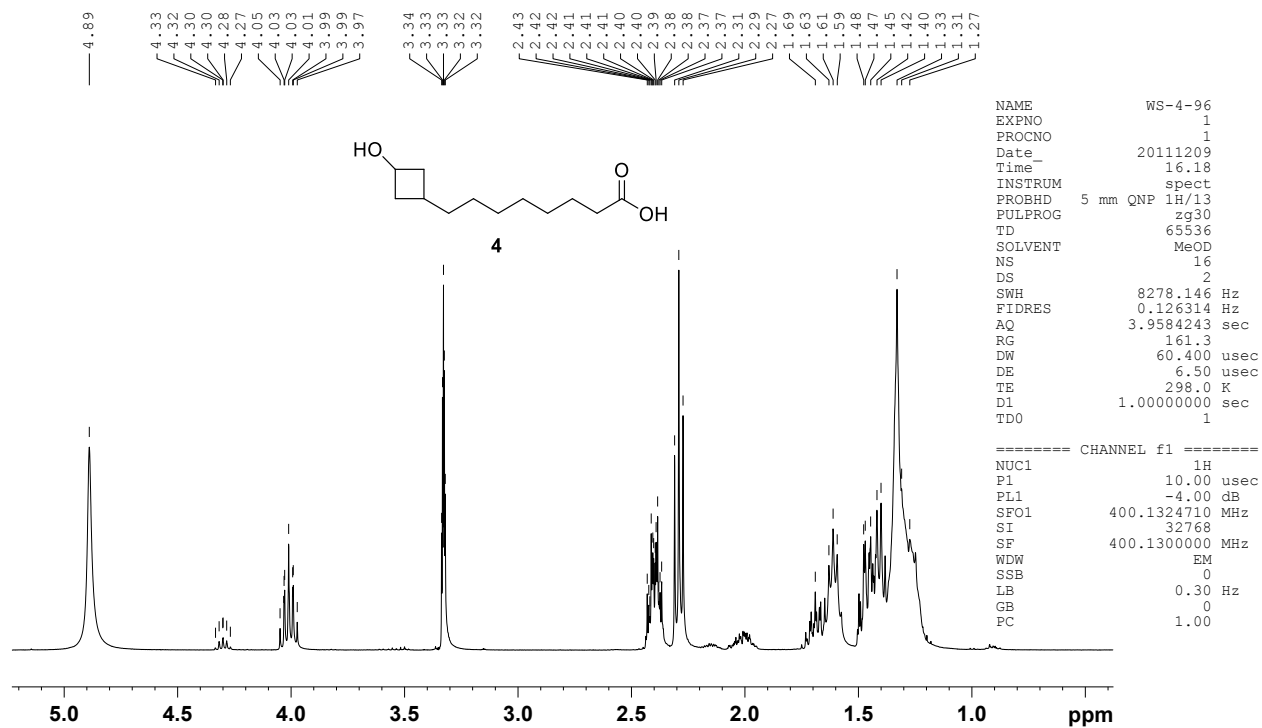

Figure S10.1. <sup>1</sup>H-NMR (400 MHz, chloroform-*d*) spectrum of 4.

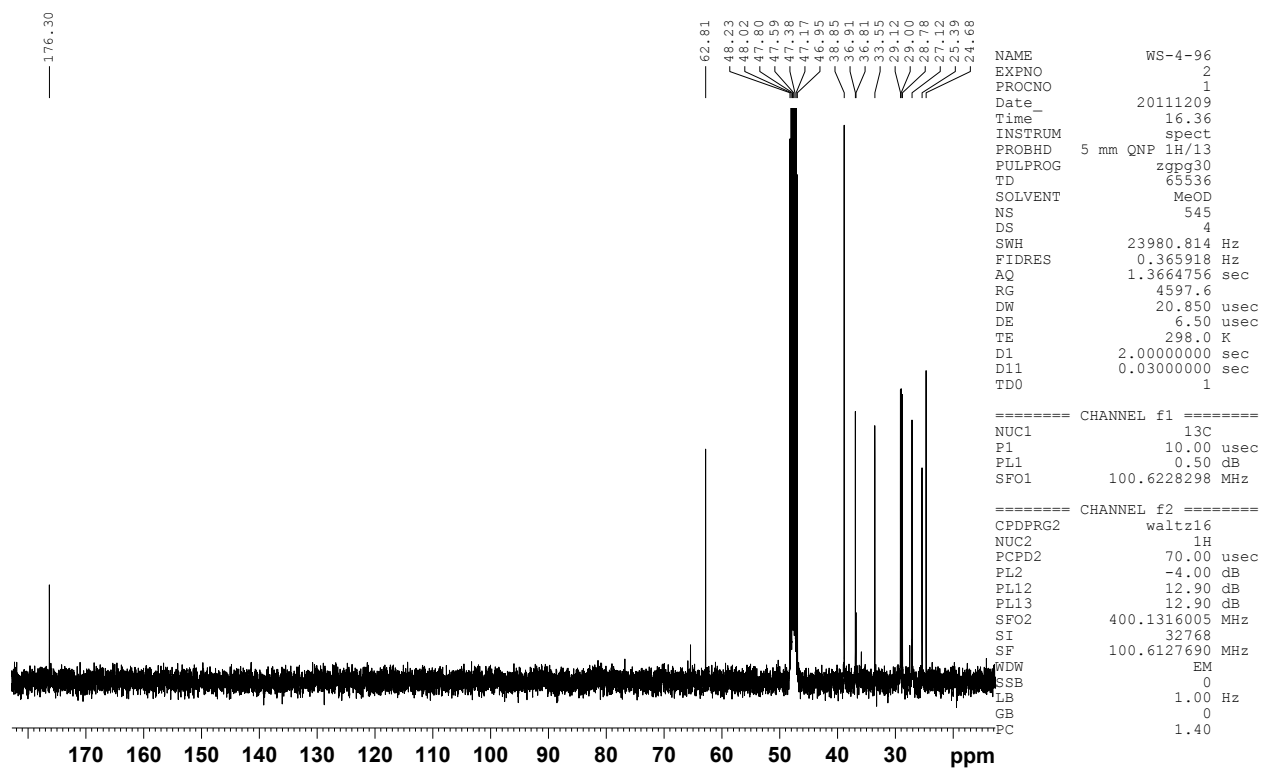

Figure S10.2. <sup>13</sup>C-NMR (100 MHz, chloroform-*d*) spectrum of 4.



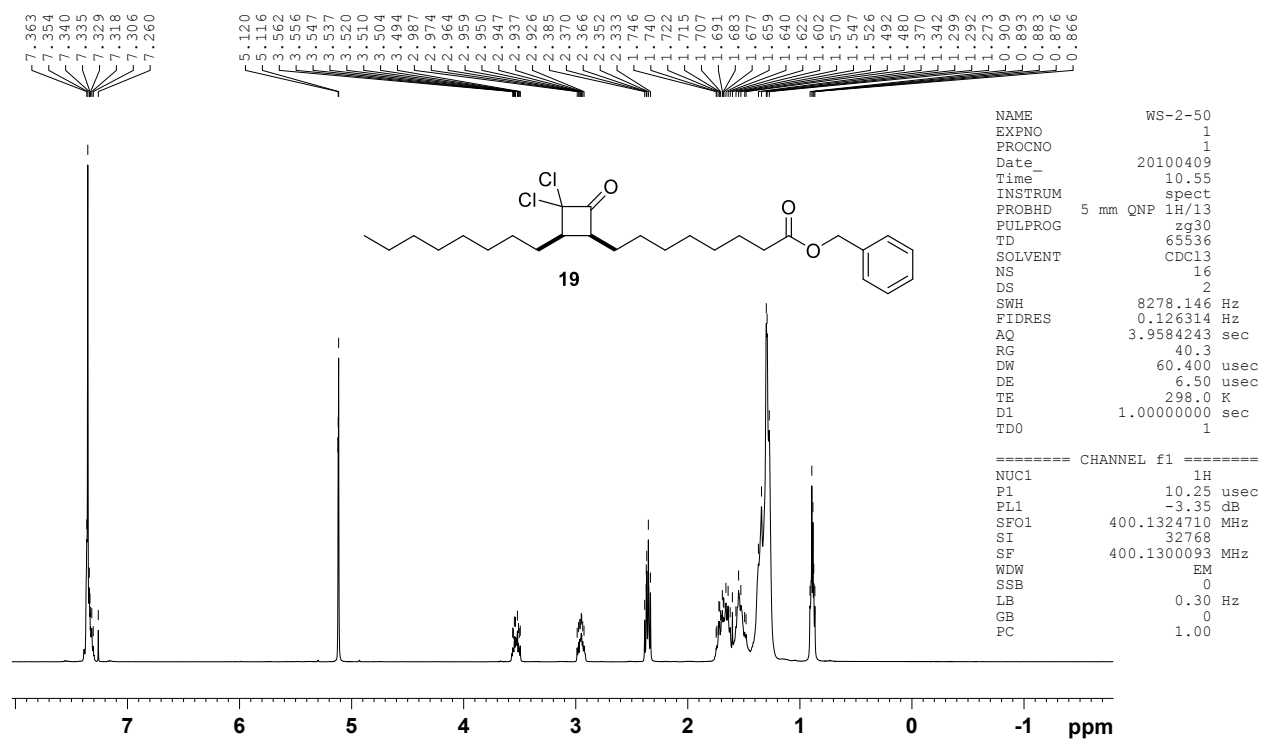

Figure S11.1. <sup>1</sup>H-NMR (400 MHz, chloroform-*d*) spectrum of **19**.

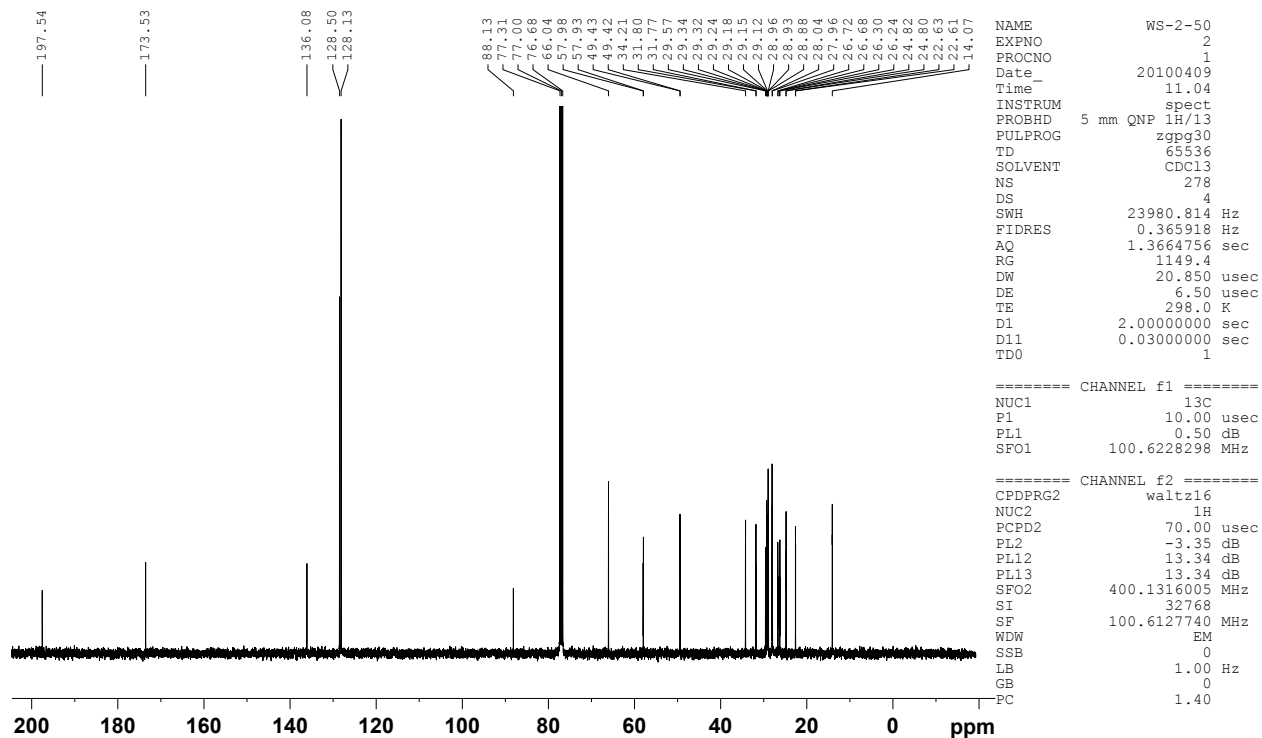

Figure S11.2. <sup>13</sup>C-NMR (100 MHz, chloroform-*d*) spectrum of **19**.

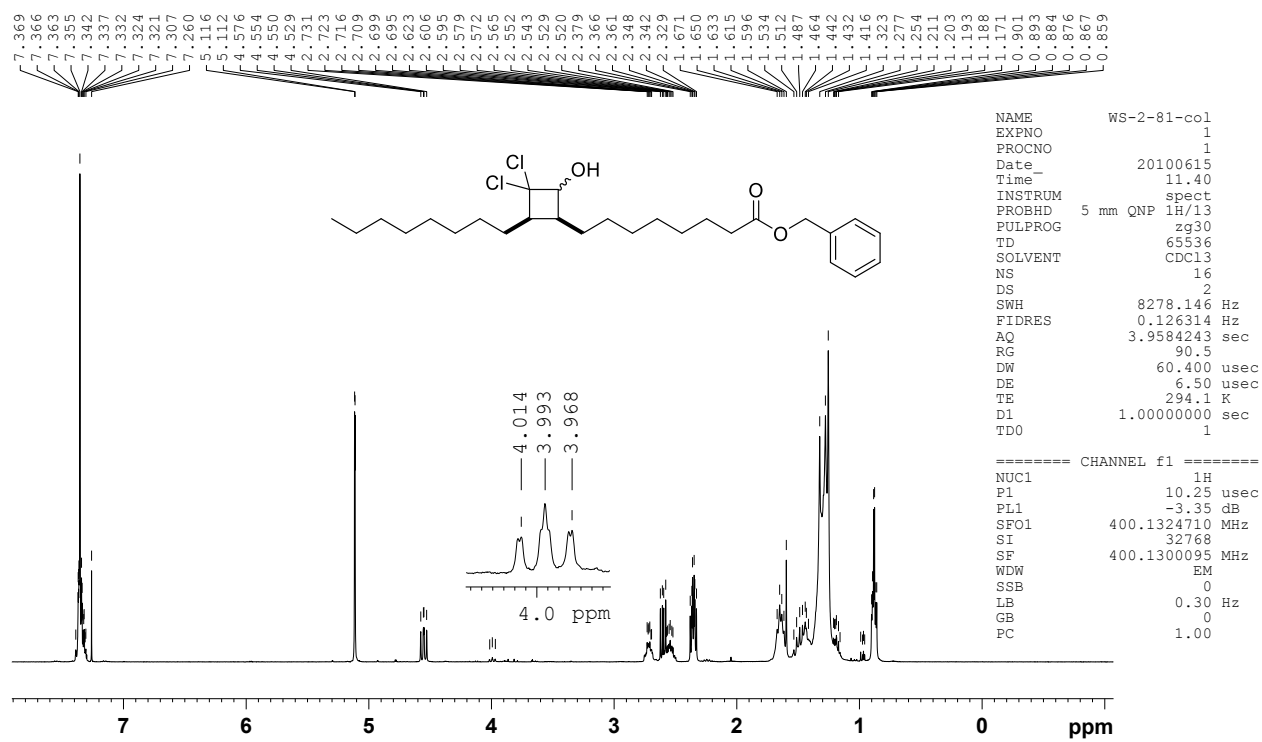

Figure S12.1. <sup>1</sup>H-NMR (400 MHz, chloroform-*d*) spectrum of the crude.

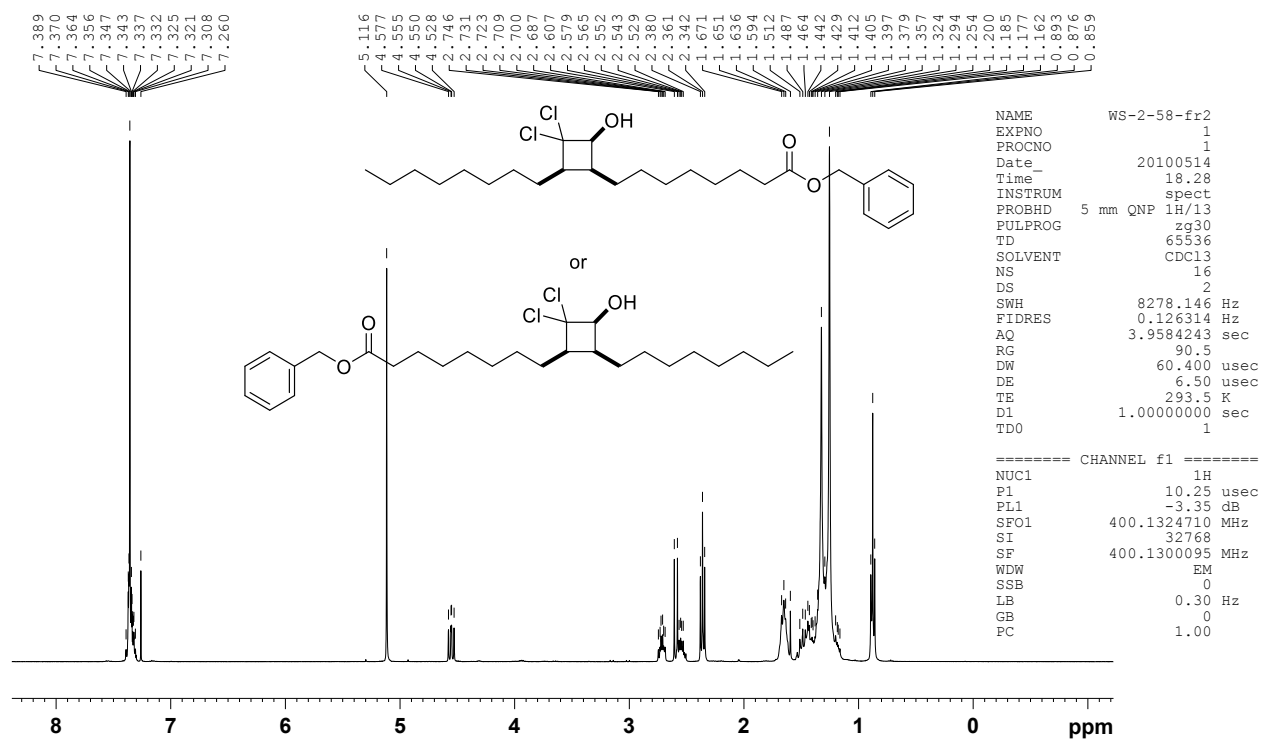

Figure S12.2. <sup>1</sup>H-NMR (400 MHz, chloroform-*d*) spectrum of first eluting *cis* isomer.

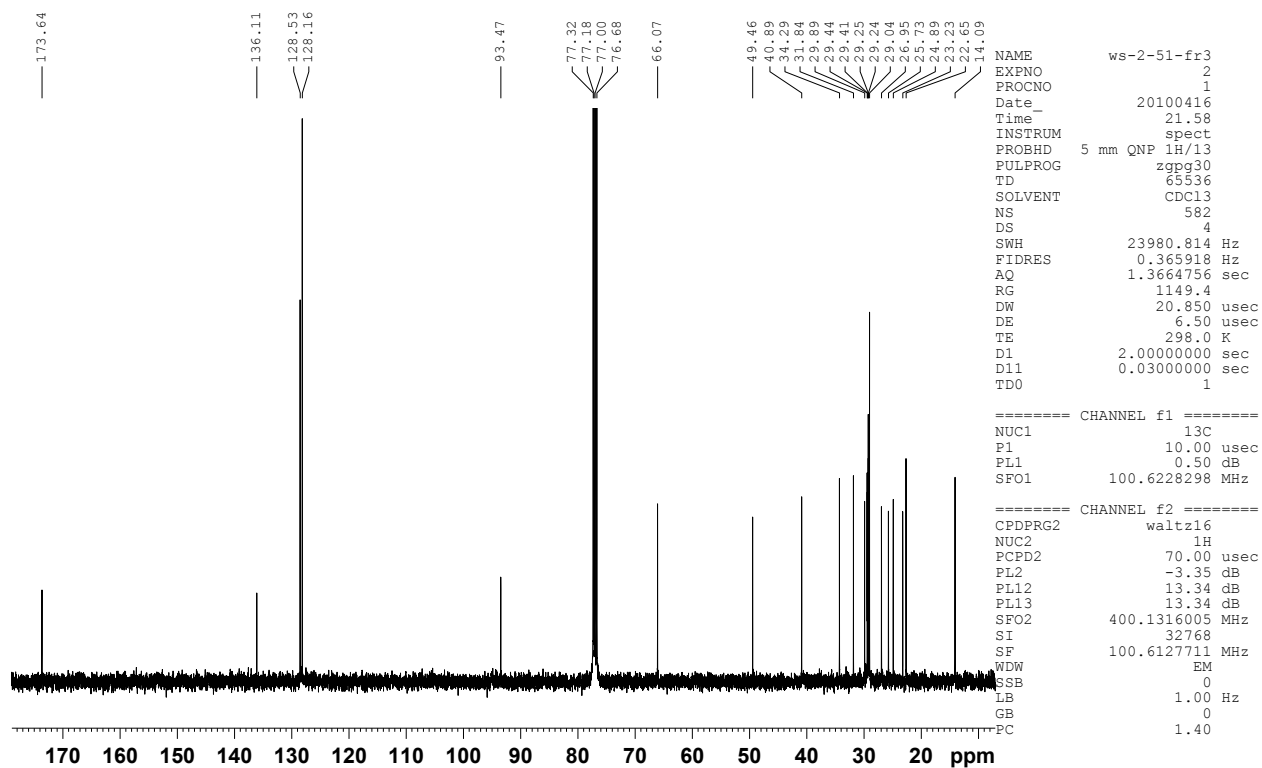

Figure S12.3. <sup>13</sup>C-NMR (100 MHz, chloroform-*d*) spectrum of first eluting *cis* isomer.

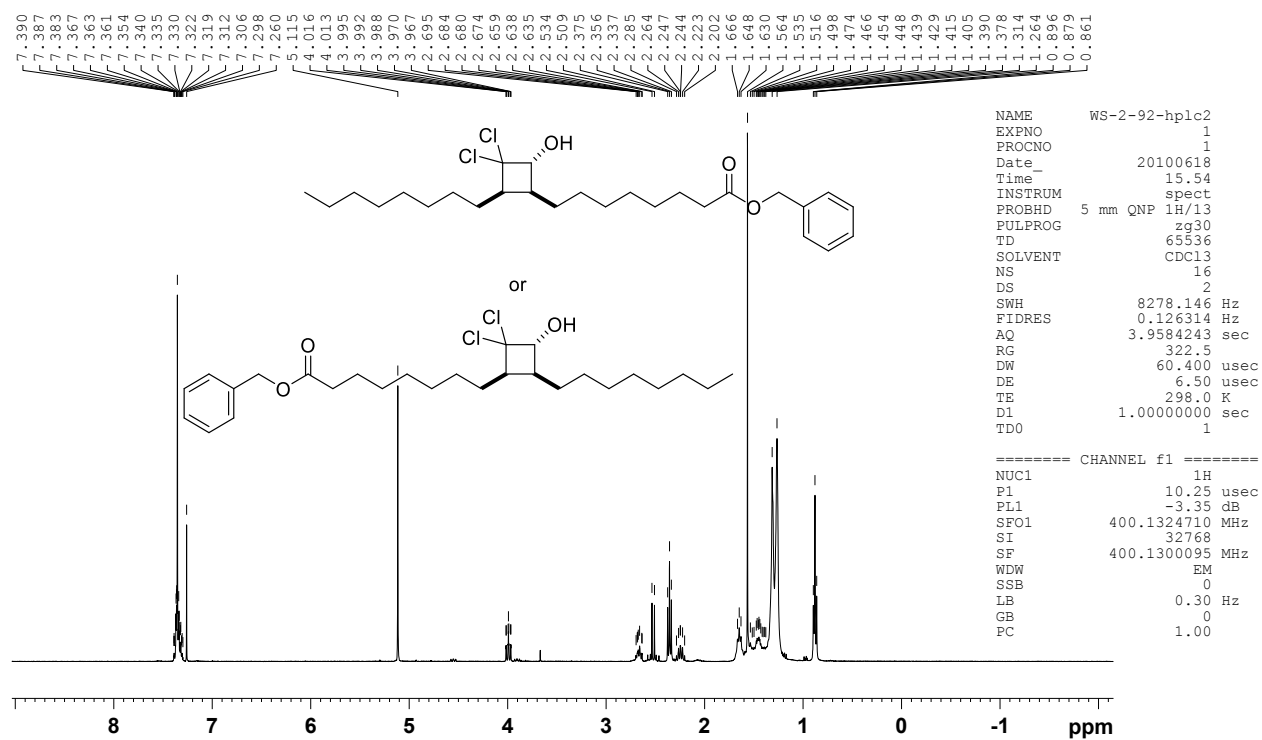

Figure S12.4. <sup>1</sup>H-NMR (400 MHz, chloroform-*d*) spectrum of first eluting *trans* isomer.

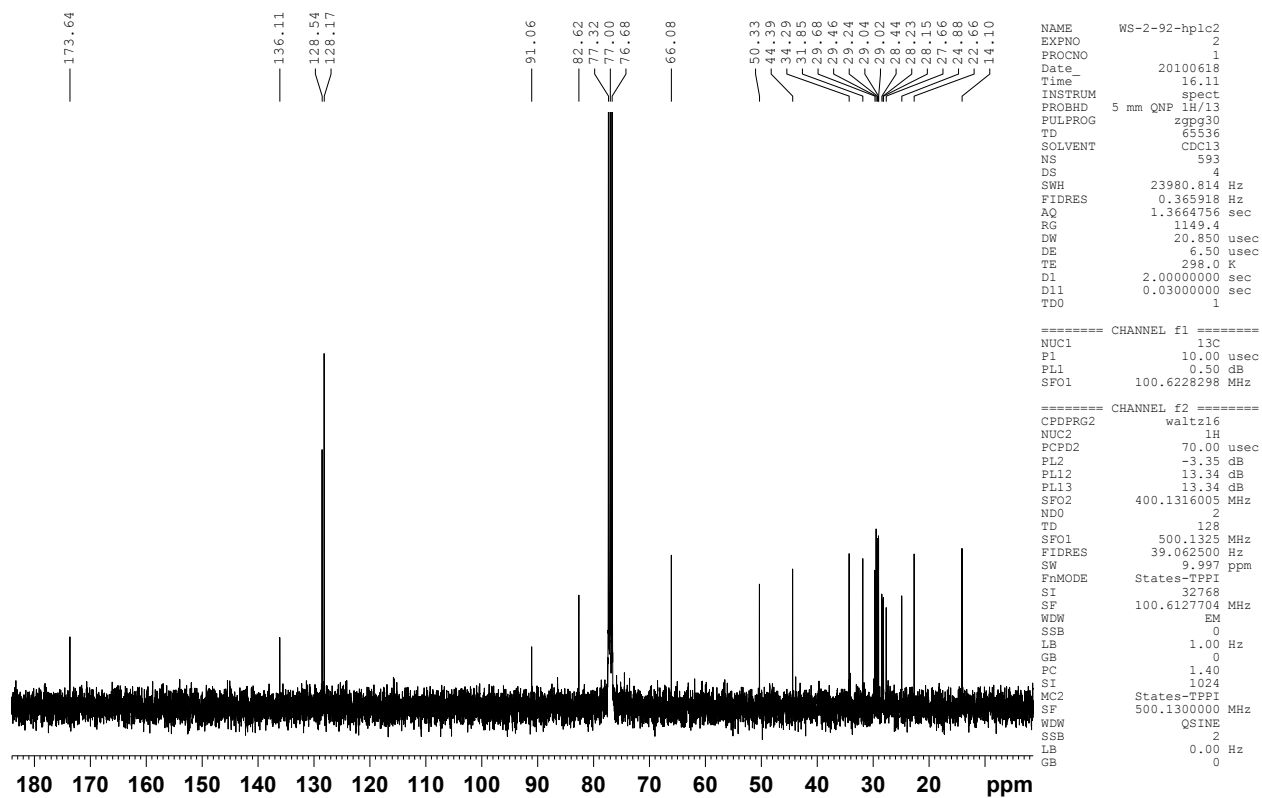

Figure S12.5. <sup>13</sup>C-NMR (100 MHz, chloroform-*d*) spectrum of first eluting *trans* isomer.

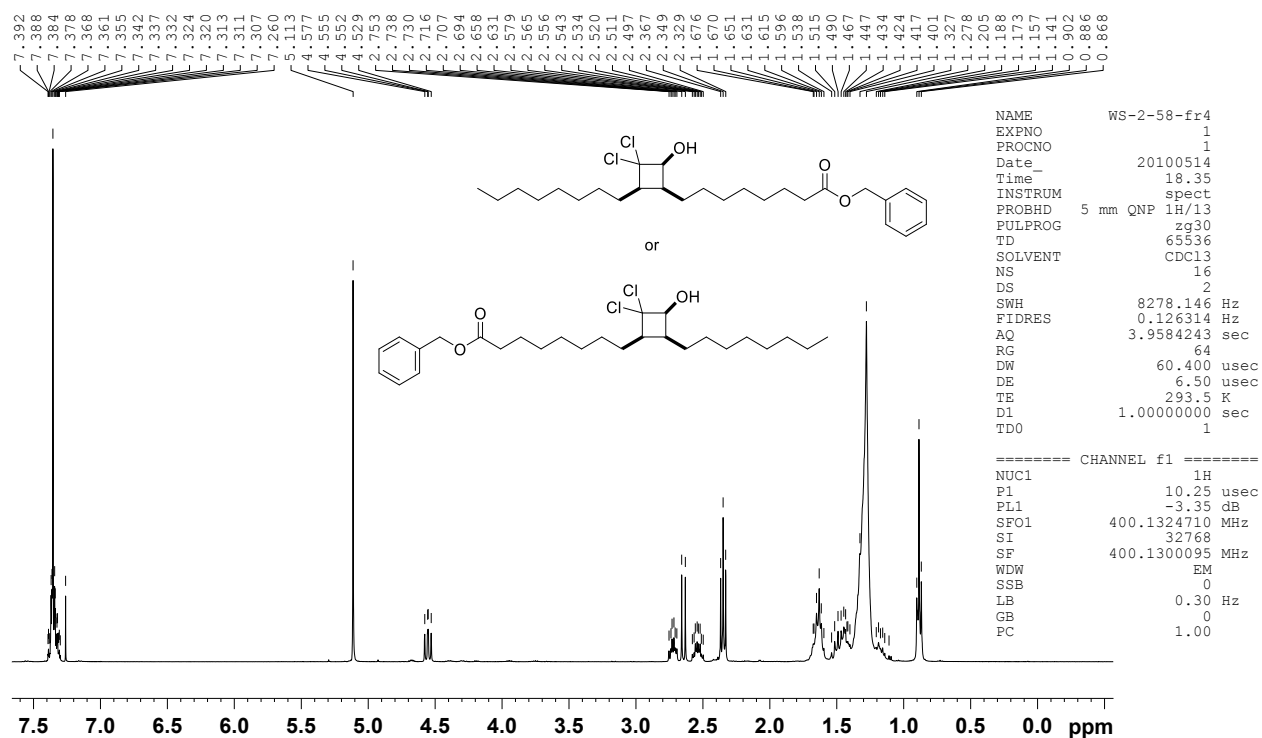

Figure S12.6. <sup>1</sup>H-NMR(400 MHz, chloroform-*d*) spectrum of second eluting *cis* isomer.

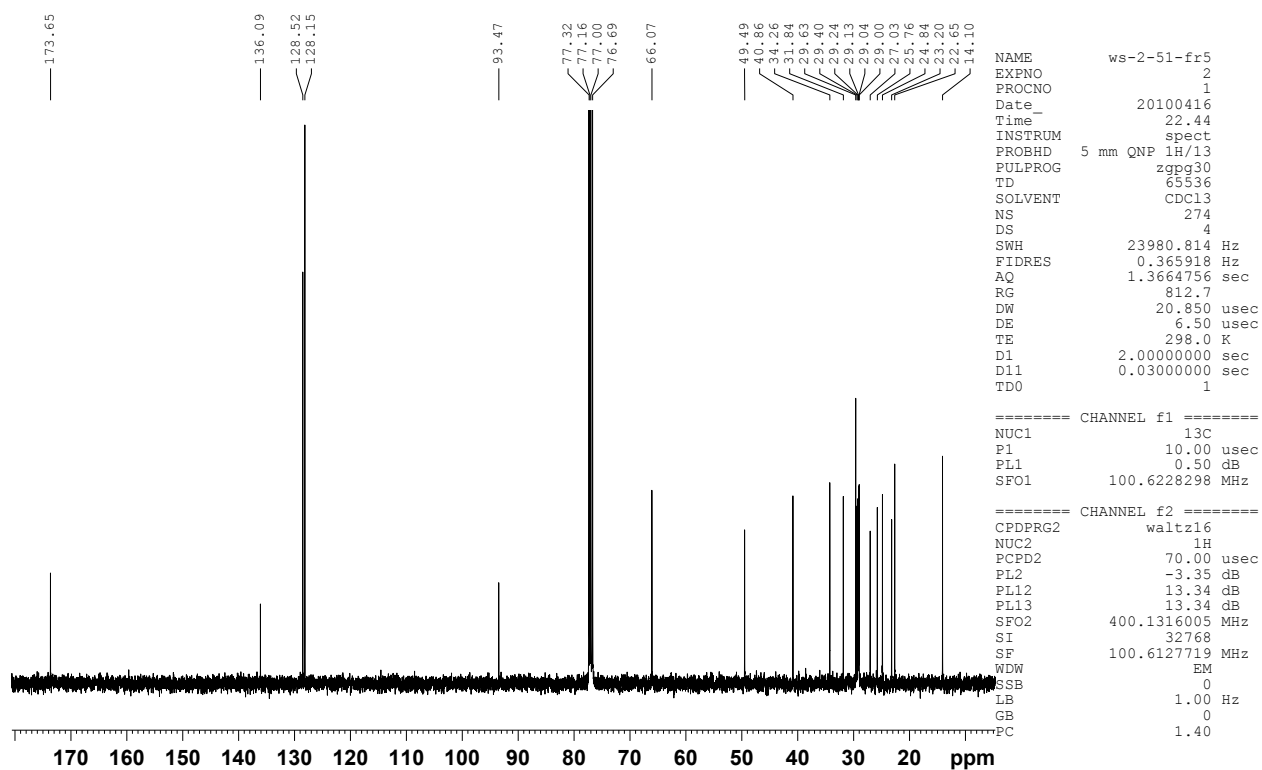

Figure S12.7. <sup>13</sup>C-NMR(100 MHz, chloroform-*d*) spectrum of second eluting *cis* isomer.

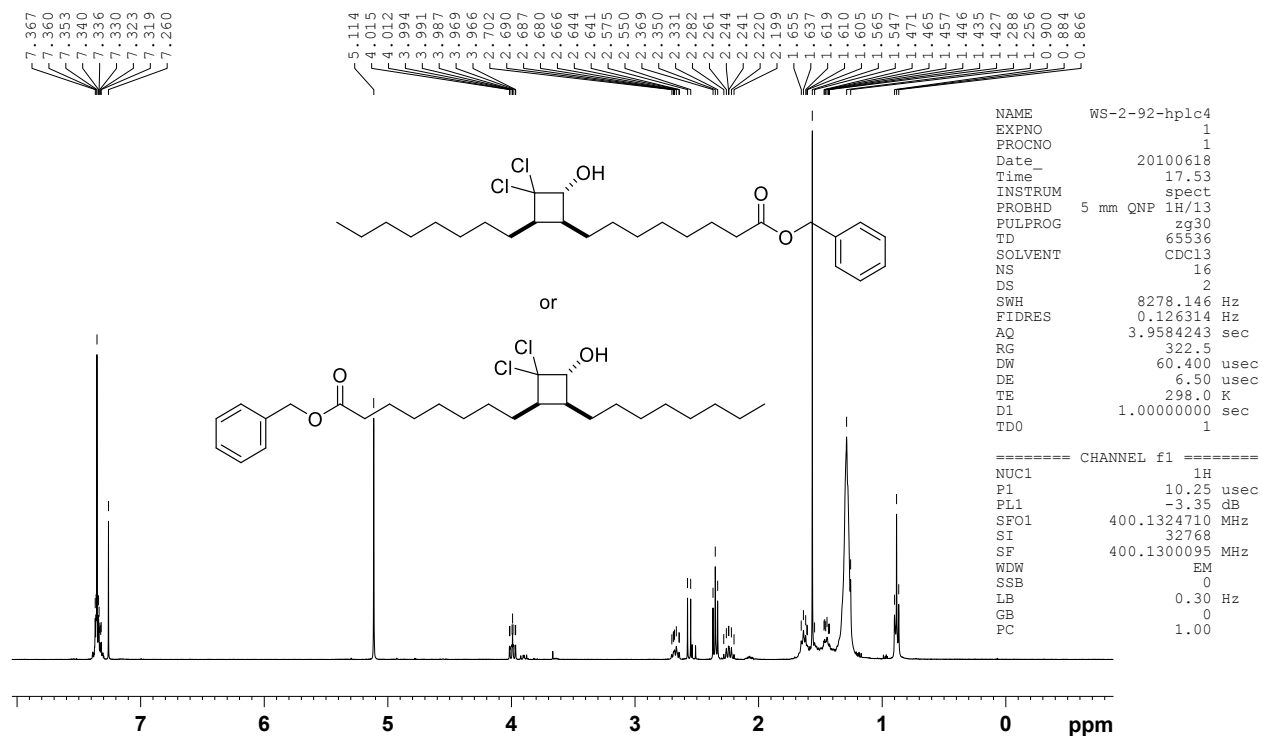

Figure S12.8. <sup>1</sup>H-NMR(400MHz, chloroform-*d*) spectrum of second eluting *trans* isomer.

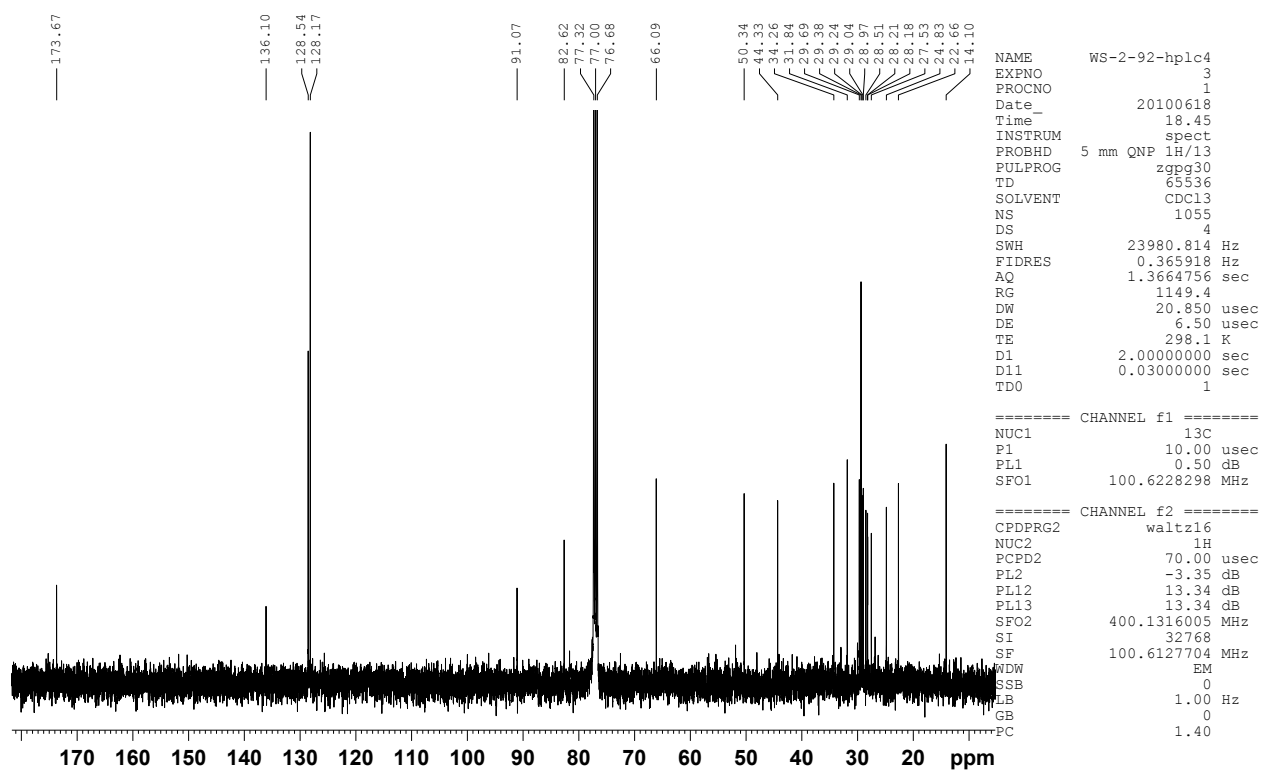

Figure S12.9. <sup>13</sup>C-NMR(100MHz, chloroform-*d*) spectrum of second eluting *trans* isomer.

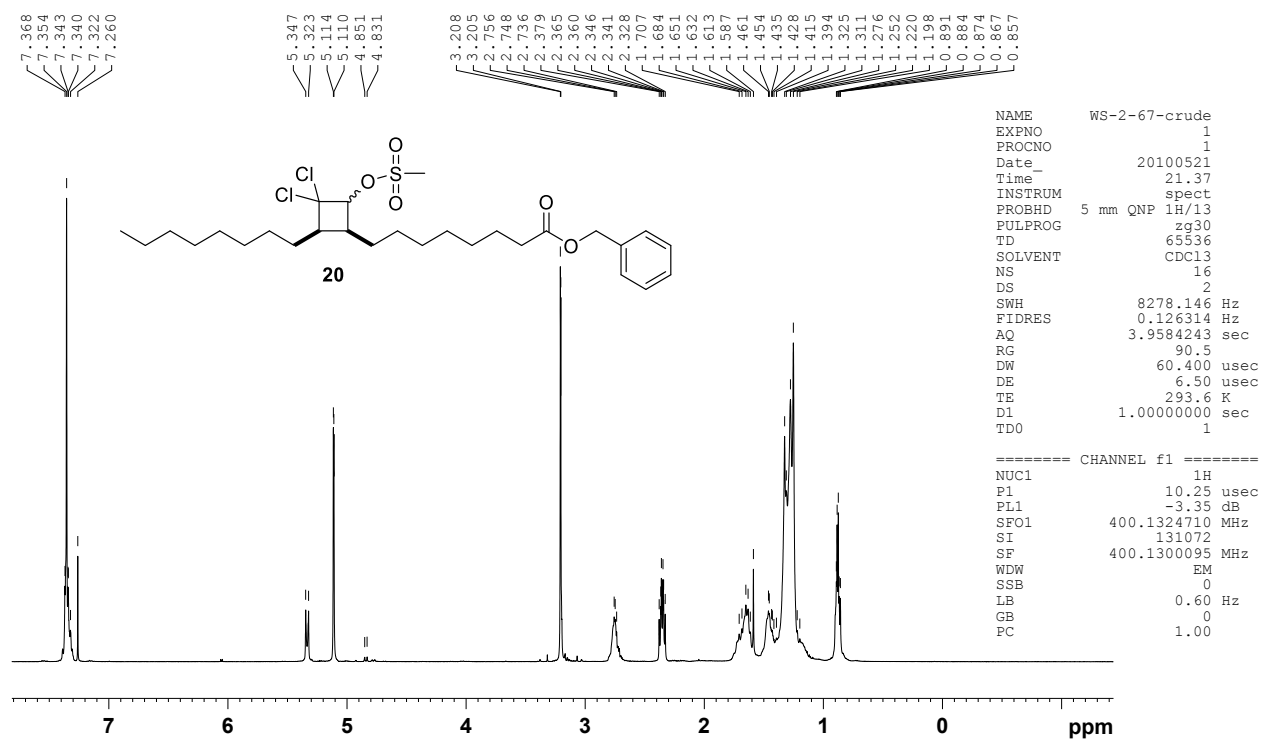

**Figure S13.1.** <sup>1</sup>H-NMR (400 MHz, chloroform-*d*) spectrum of crude **20**.

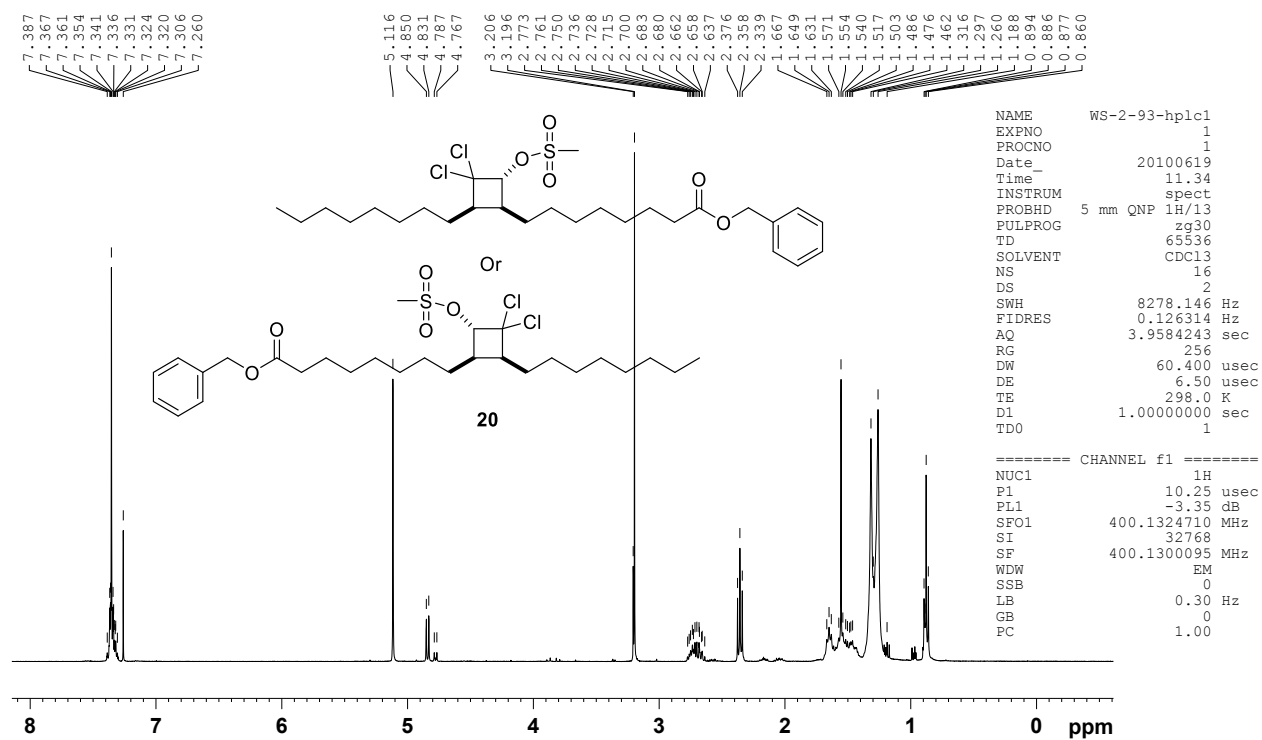

Figure S13.2. <sup>1</sup>H-NMR (400 MHz, chloroform-*d*) spectrum of first eluting *trans* isomer of **20**.

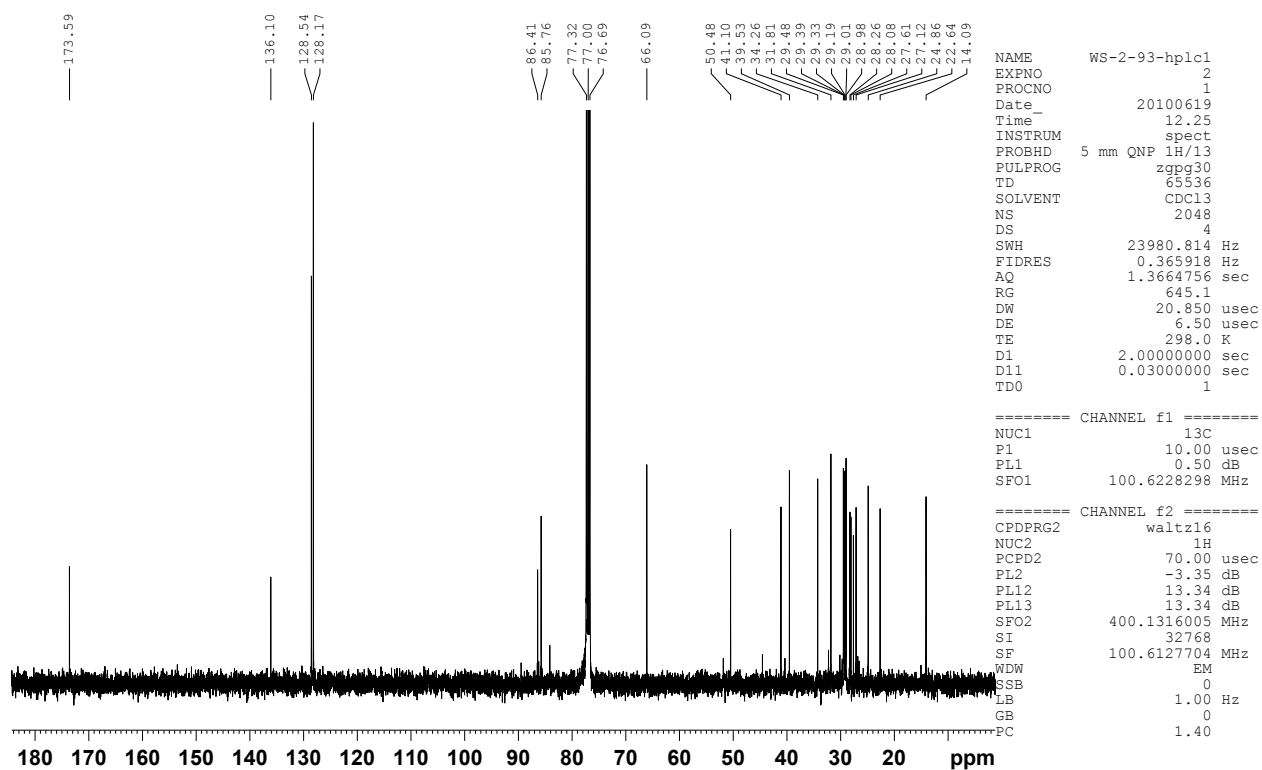

Figure S13.3. <sup>13</sup>C-NMR(100 MHz, chloroform-*d*) spectrum of first eluting *trans* isomer of **20**.



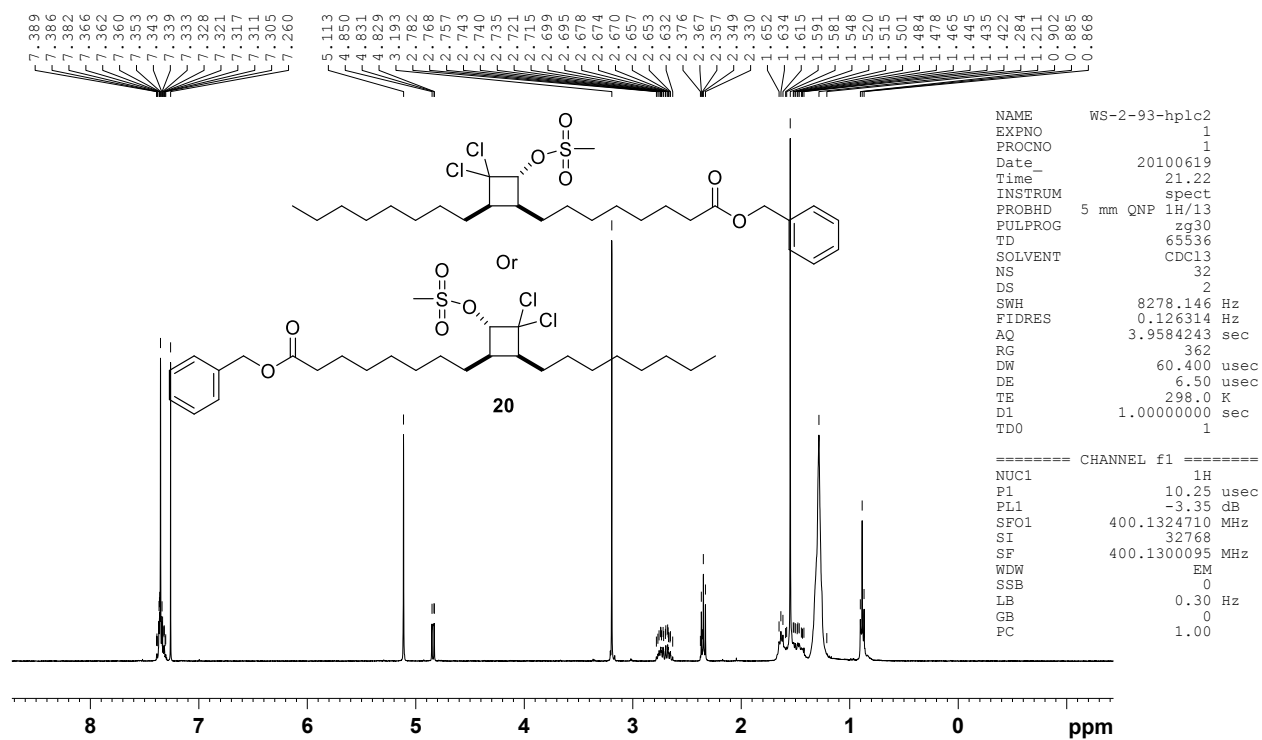

FigureS13.4. <sup>1</sup>H-NMR(400MHz, chloroform-*d*) spectrum of second eluting *trans* isomer of 20.

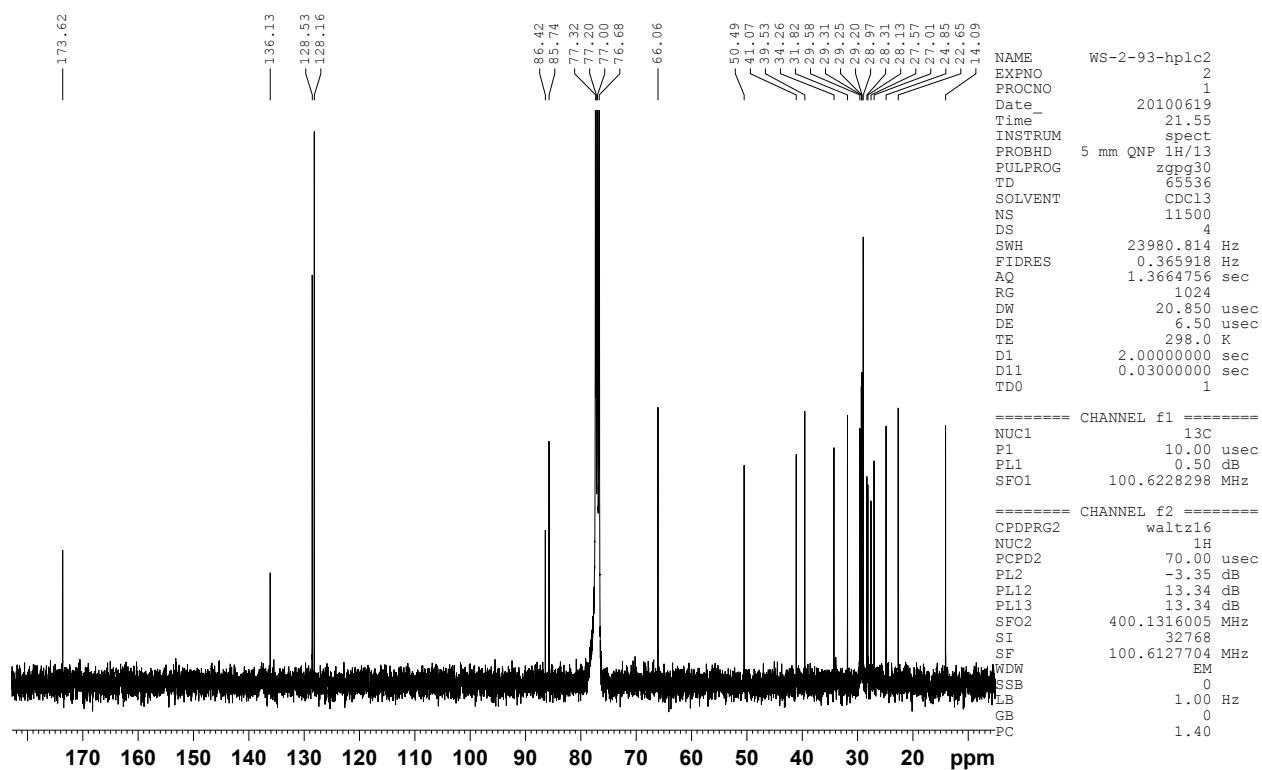

FigureS13.5. <sup>13</sup>C-NMR(100MHz, chloroform-*d*) spectrum of second eluting *trans* isomer of 20.

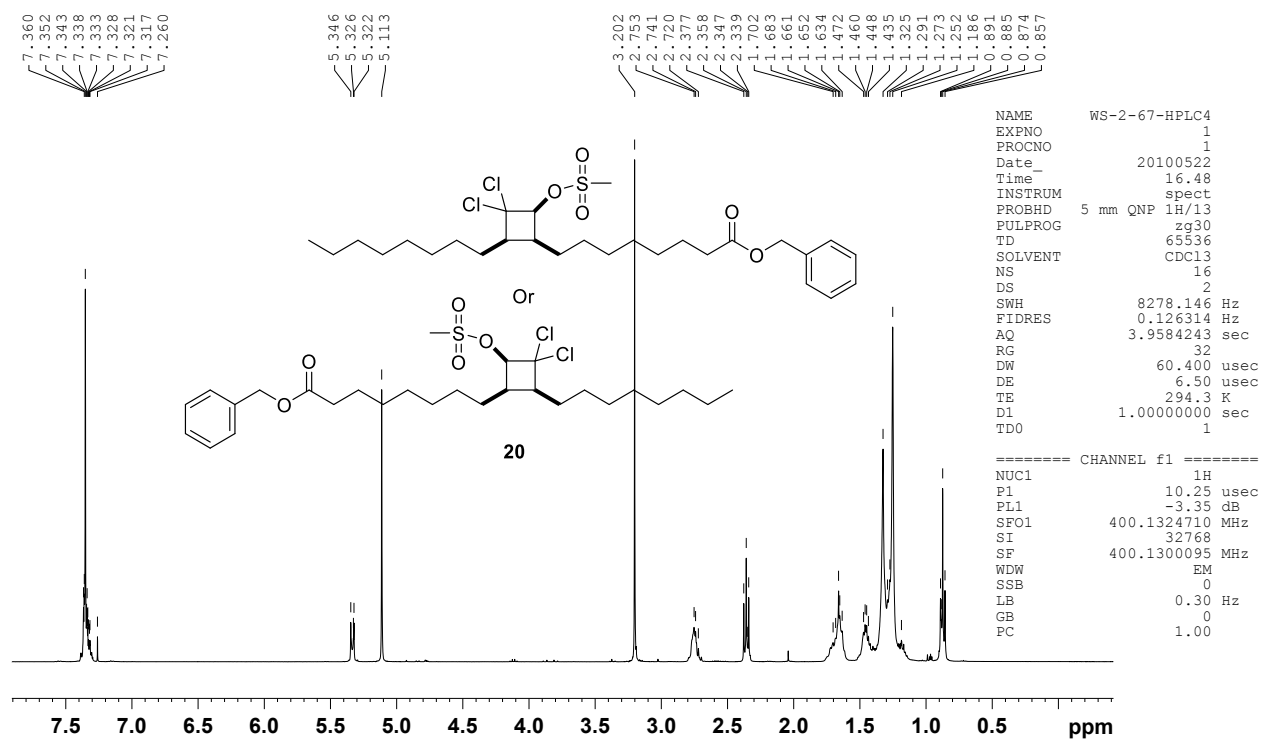Figure S13.6.  $^1\text{H-NMR}$  (400 MHz, chloroform- $d$ ) spectrum of first eluting *cis* isomer of **20**.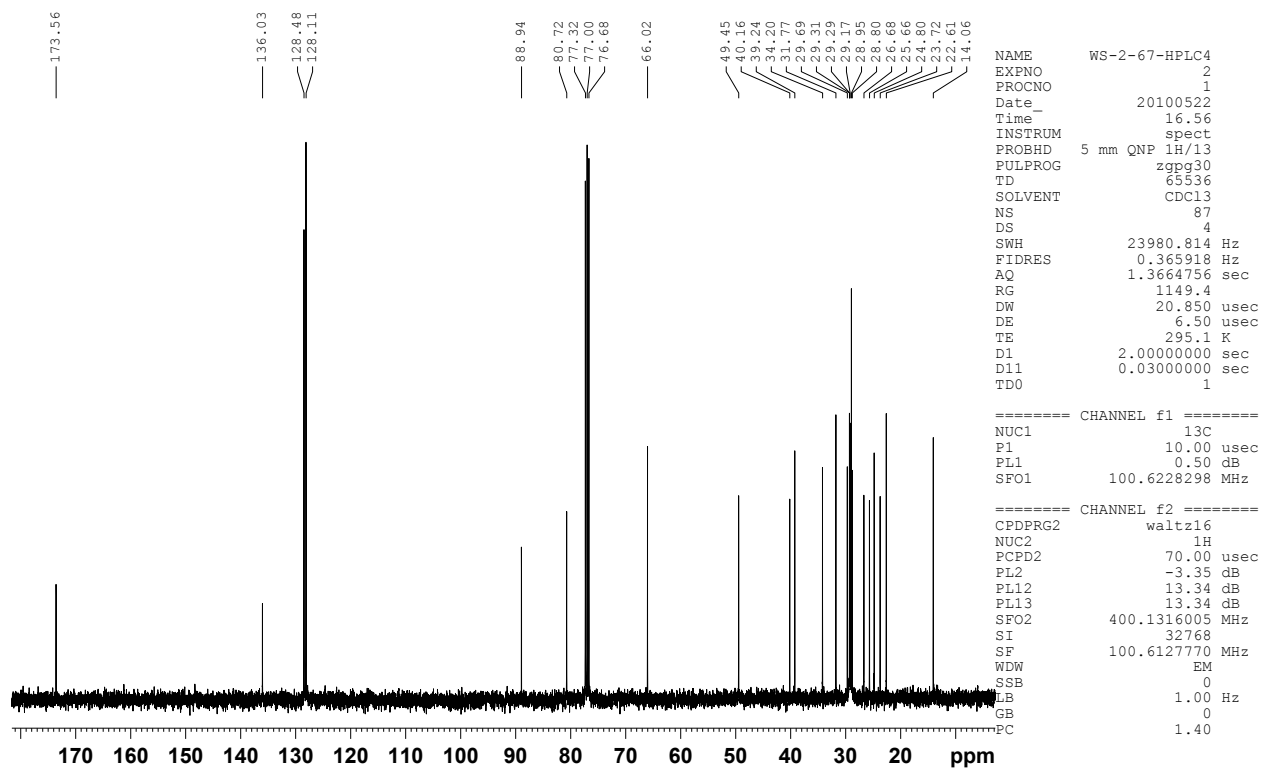Figure S13.7.  $^{13}\text{C-NMR}$  (100 MHz, chloroform- $d$ ) spectrum of first eluting *cis* isomer of **20**.

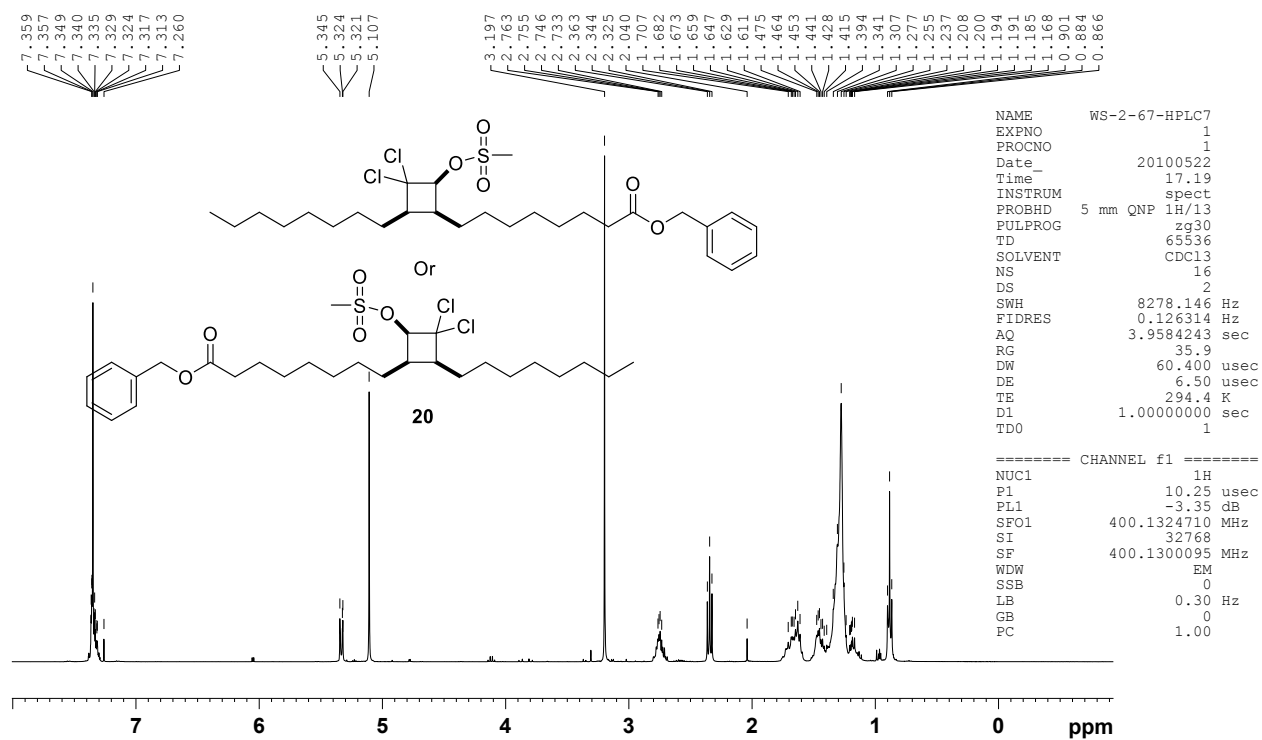

Figure S13.8. <sup>1</sup>H-NMR(400 MHz, chloroform-*d*) spectrum of second eluting *cis* isomer of **20**.

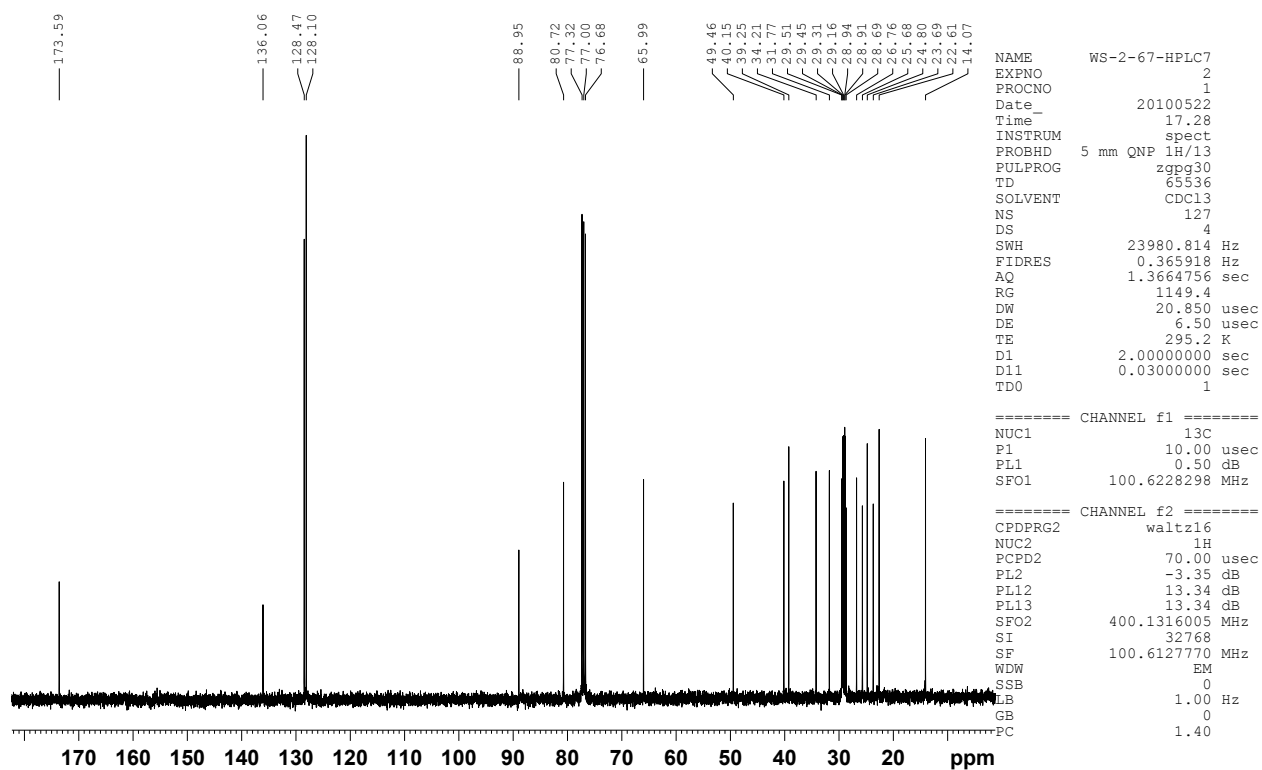

Figure S13.9. <sup>13</sup>C-NMR(100 MHz, chloroform-*d*) spectrum of second eluting *cis* isomer of **20**.

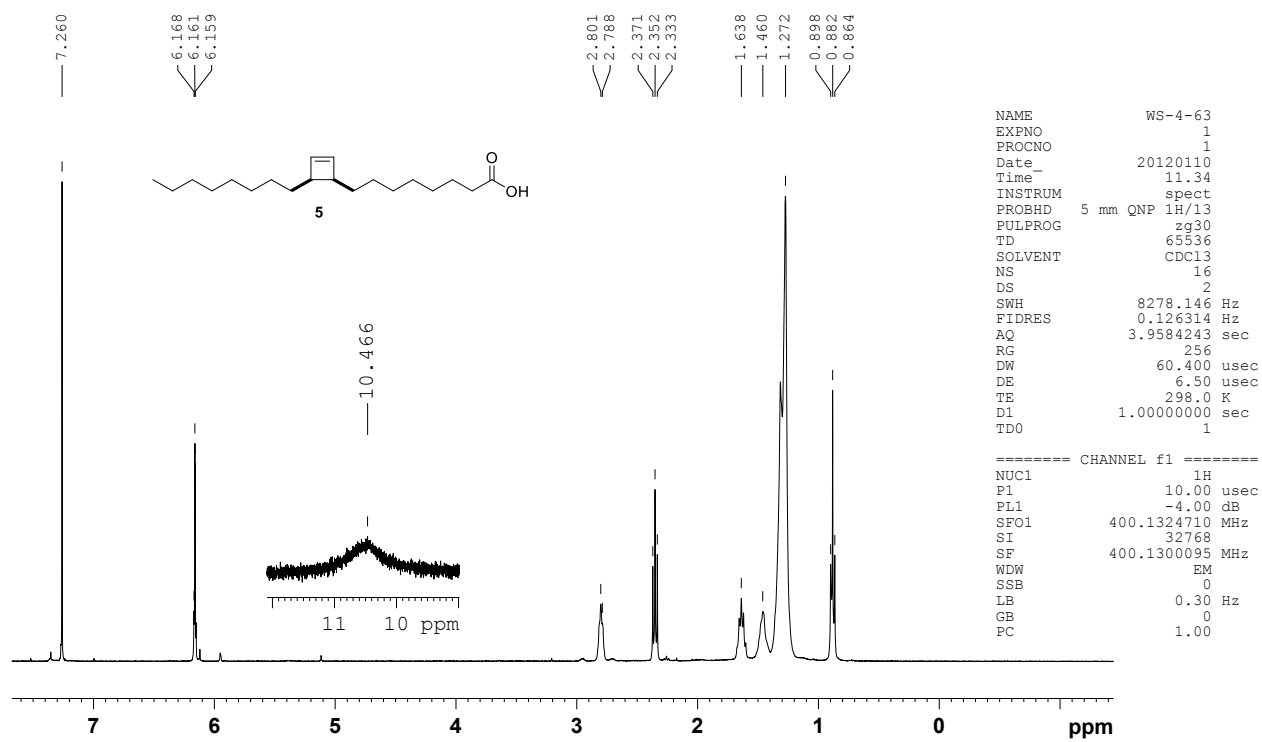

Figure S20.1. <sup>1</sup>H-NMR (400 MHz, chloroform-*d*) spectrum of compound 5.

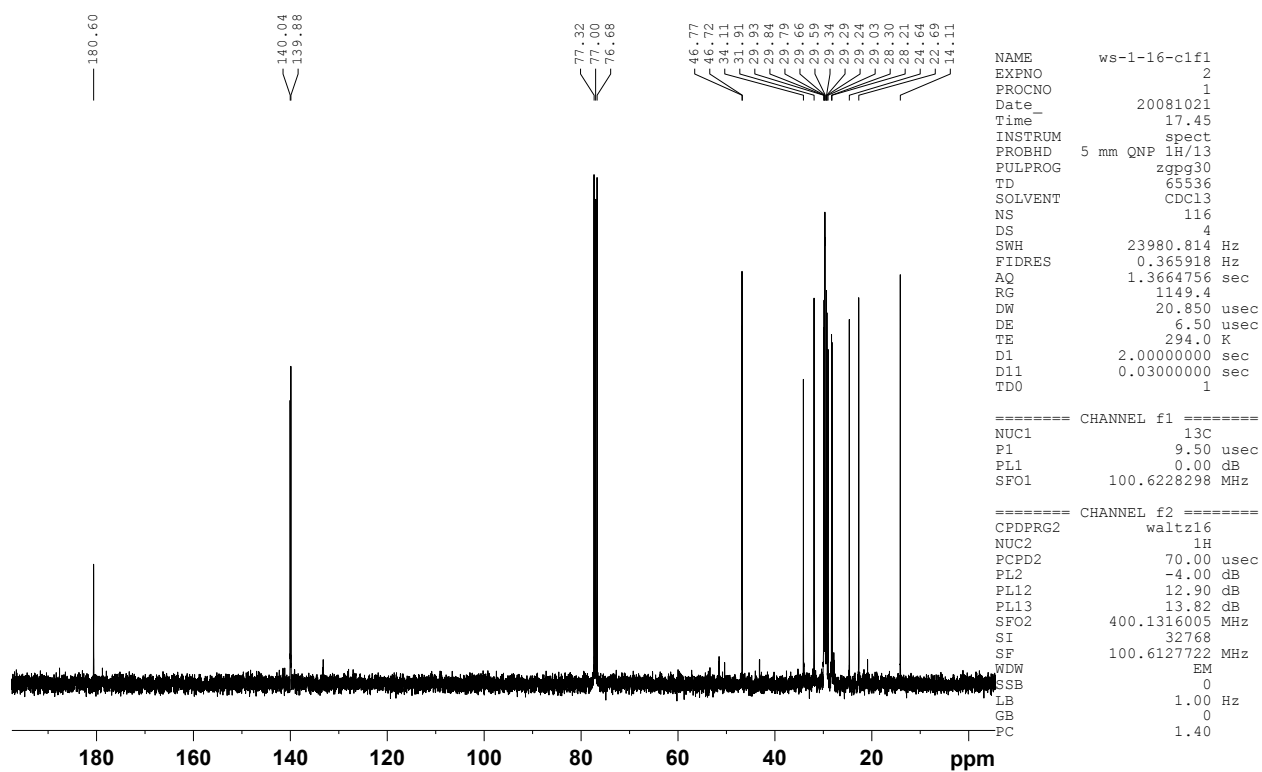

Figure S20.2. <sup>13</sup>C-NMR (100 MHz, chloroform-*d*) spectrum of compound 5.

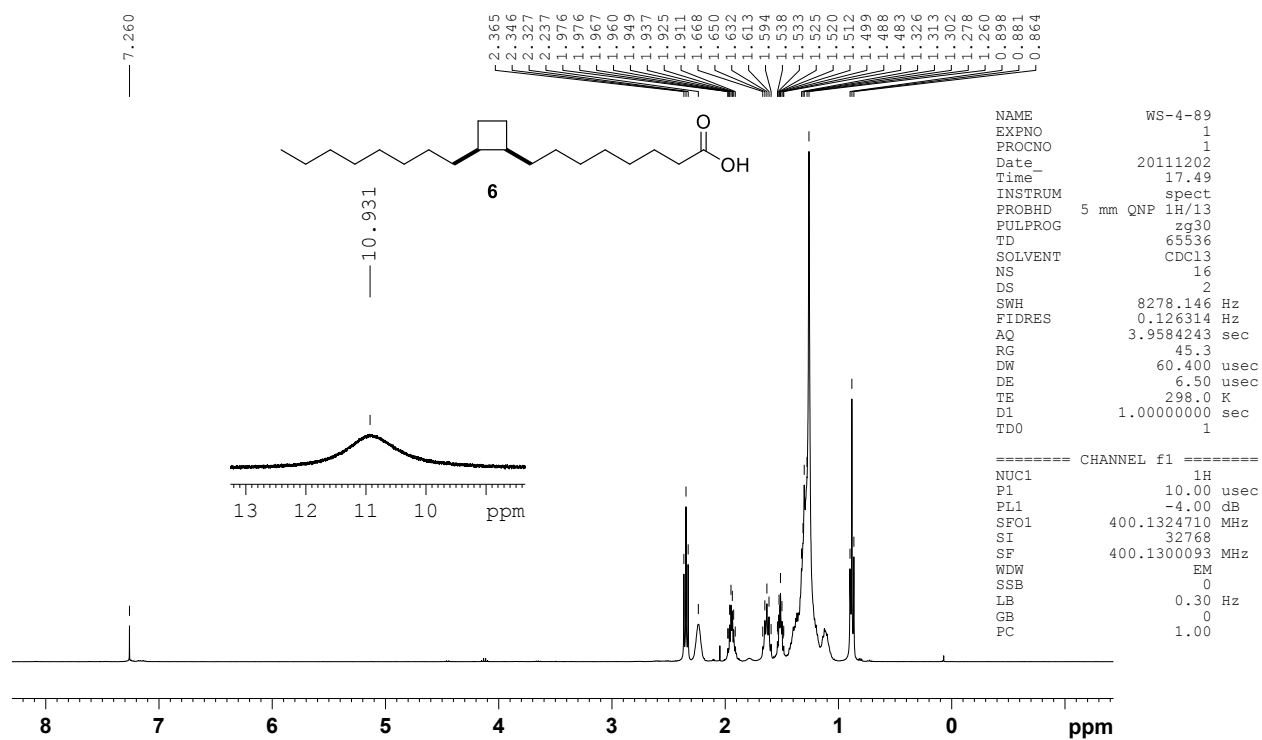

Figure S21.1. <sup>1</sup>H-NMR (400 MHz, chloroform-*d*) spectrum of compound 6.

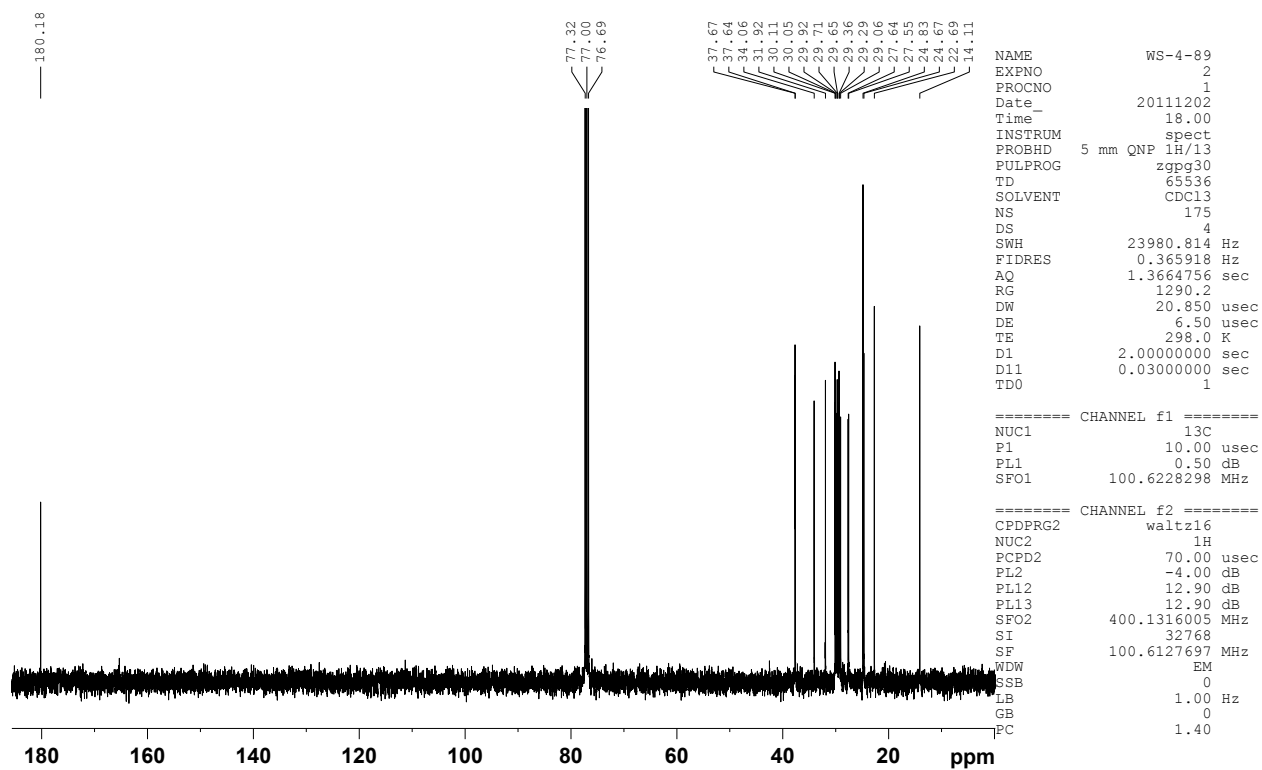

Figure S21.2. <sup>13</sup>C-NMR (100 MHz, chloroform-*d*) spectrum of compound 6.

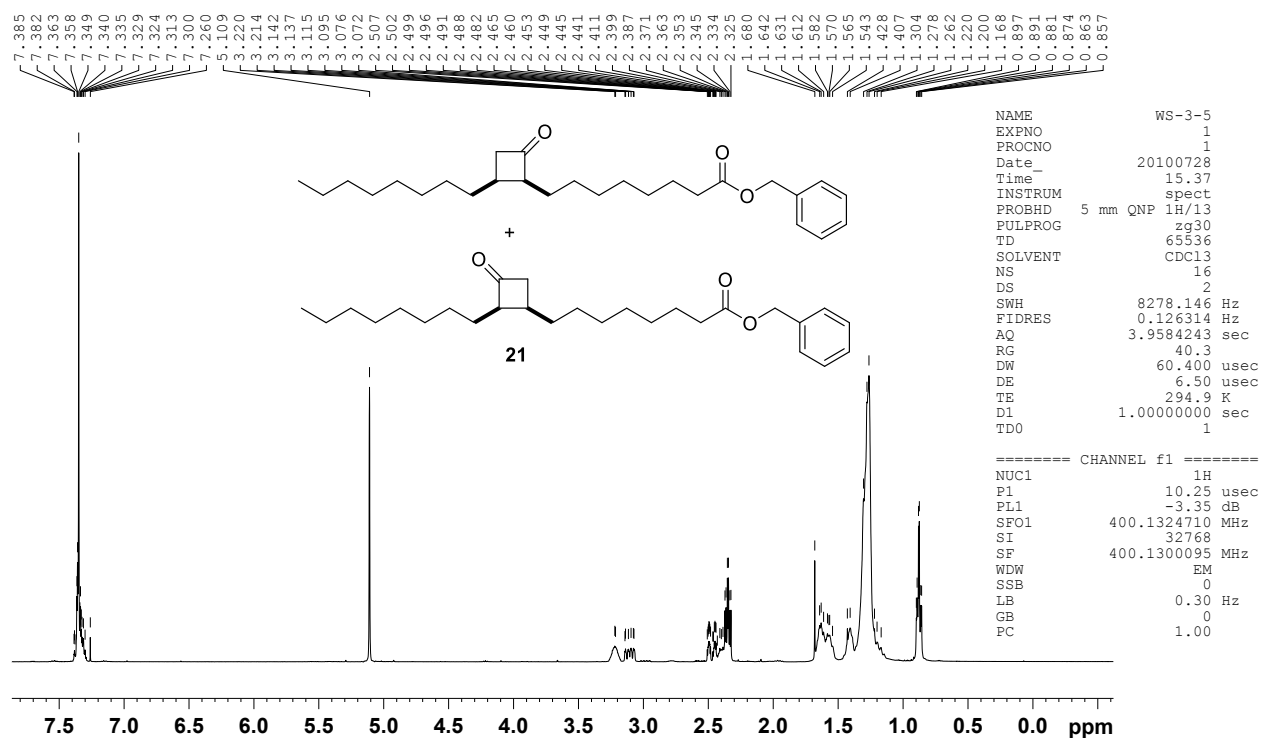Figure S22.1. <sup>1</sup>H-NMR (400 MHz, chloroform-*d*) spectrum of compound 21.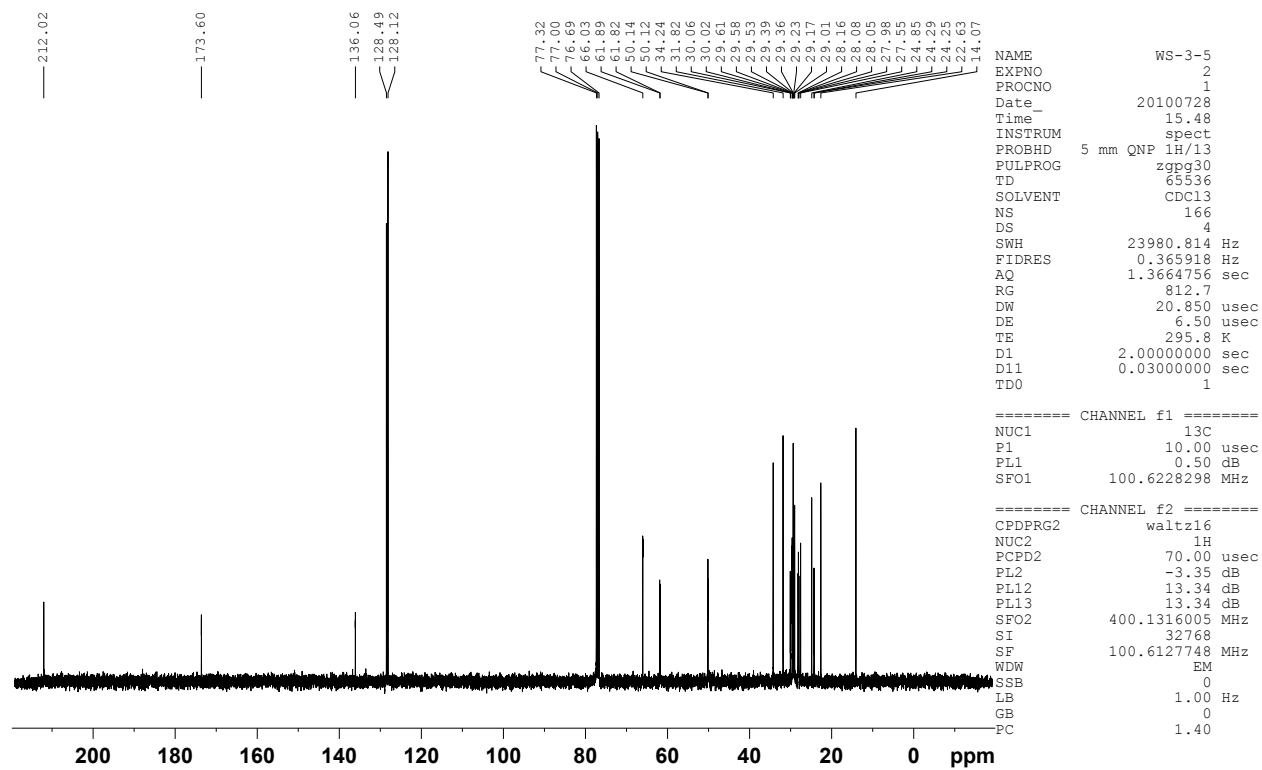Figure S22.2. <sup>13</sup>C-NMR (100 MHz, chloroform-*d*) spectrum of compound 21.

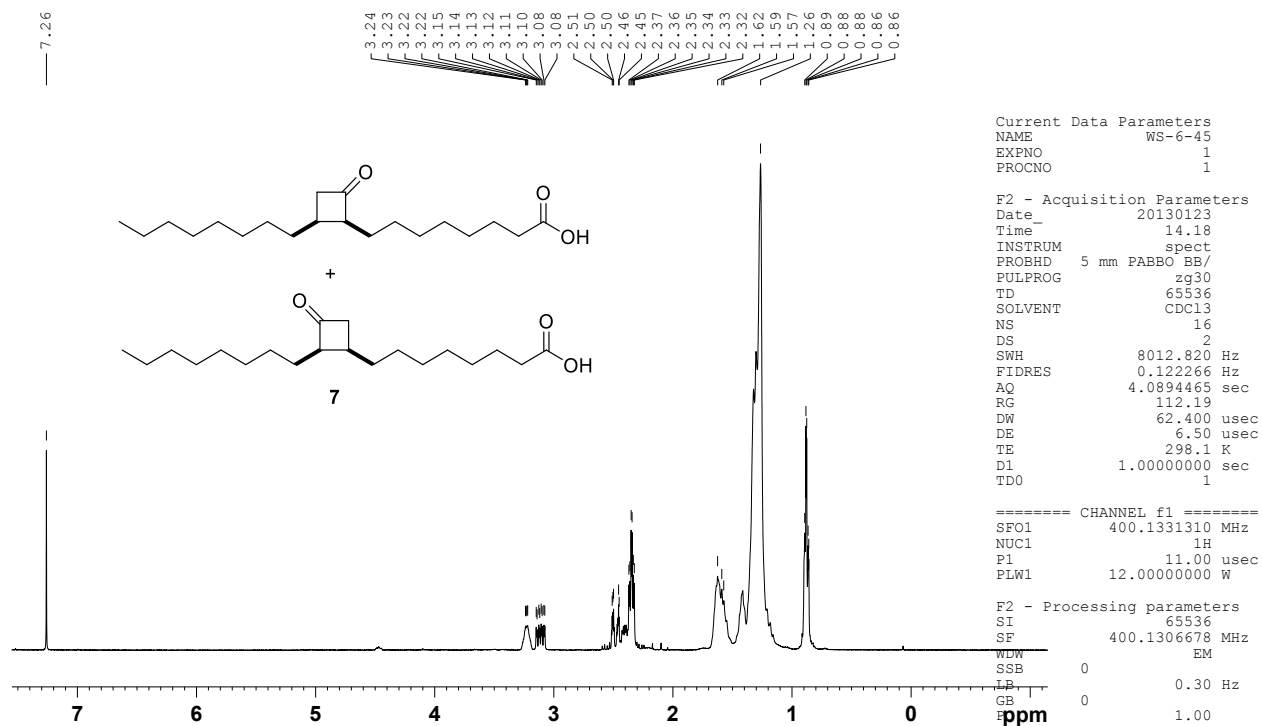

Figure S23.1. <sup>1</sup>H-NMR (400 MHz, chloroform-*d*) spectrum of compound 7.

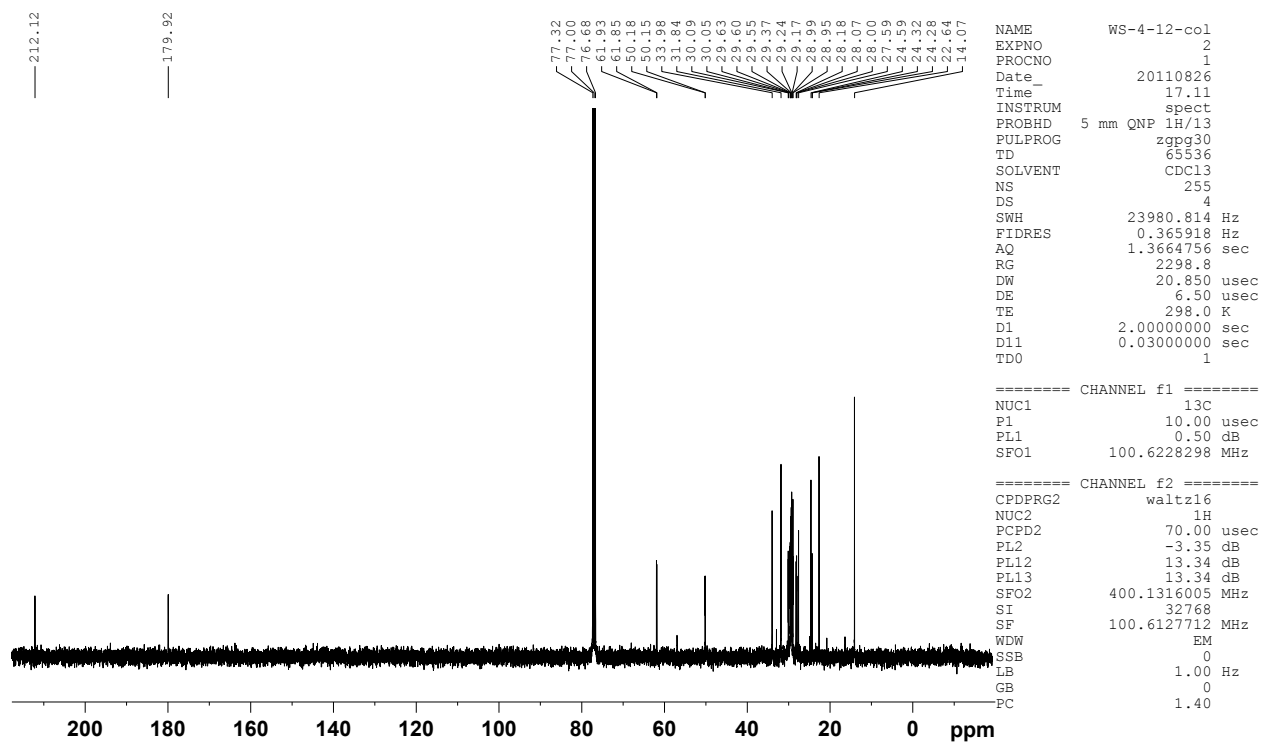

Figure S23.2. <sup>13</sup>C-NMR (100 MHz, chloroform-*d*) spectrum of compound 7.

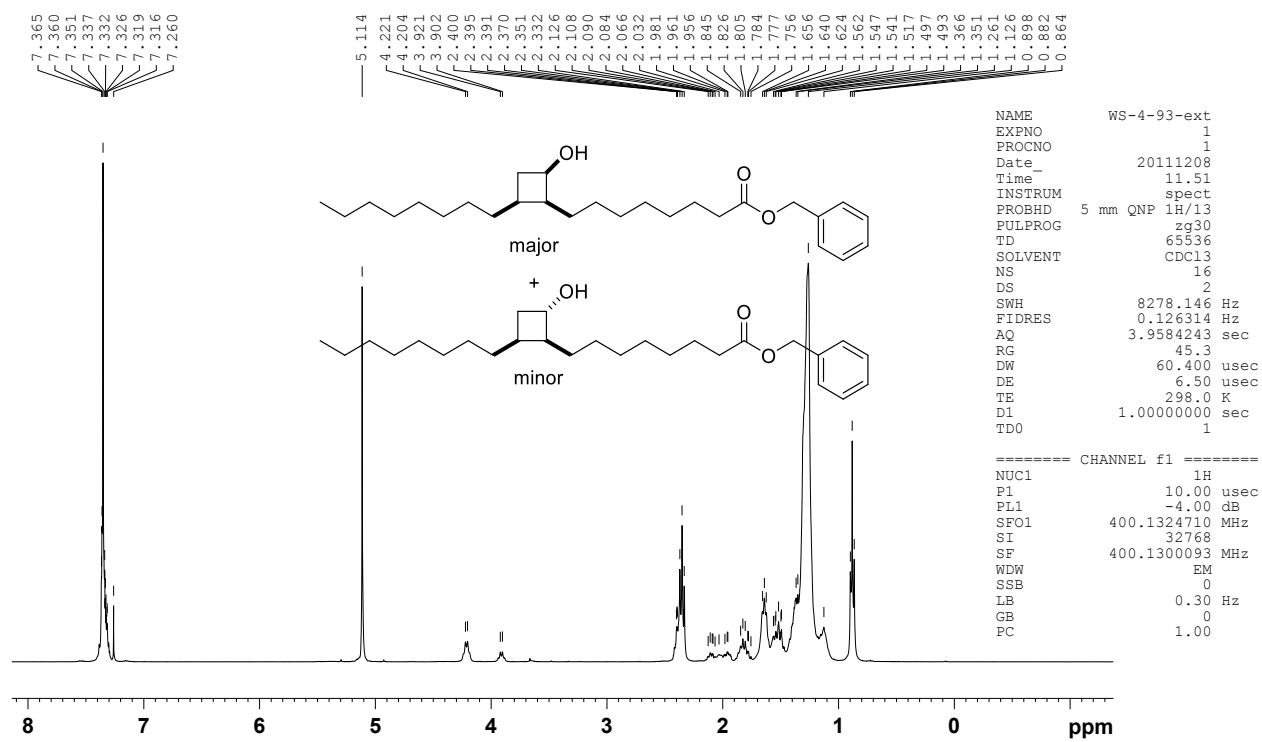

Figure S24.1. <sup>1</sup>H-NMR (400 MHz, chloroform-*d*) spectrum.

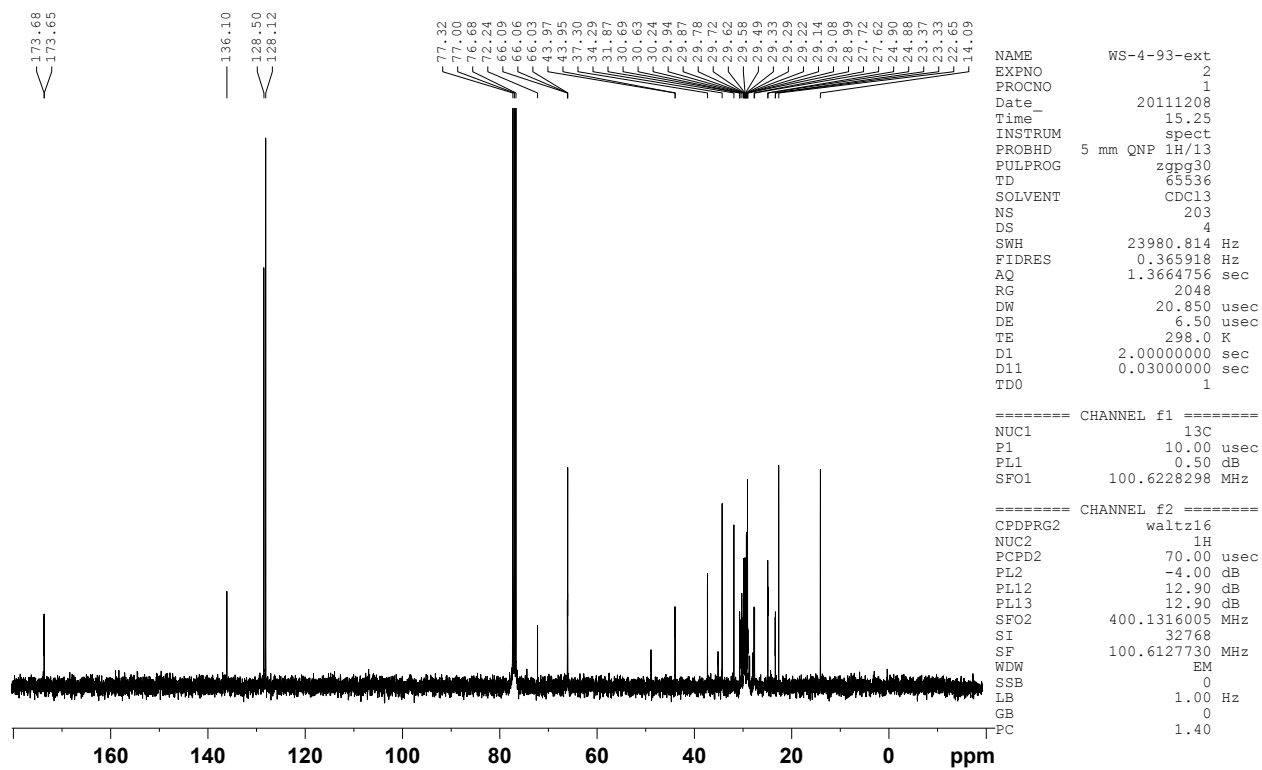

Figure S24.2. <sup>13</sup>C-NMR (100 MHz, chloroform-*d*) spectrum.



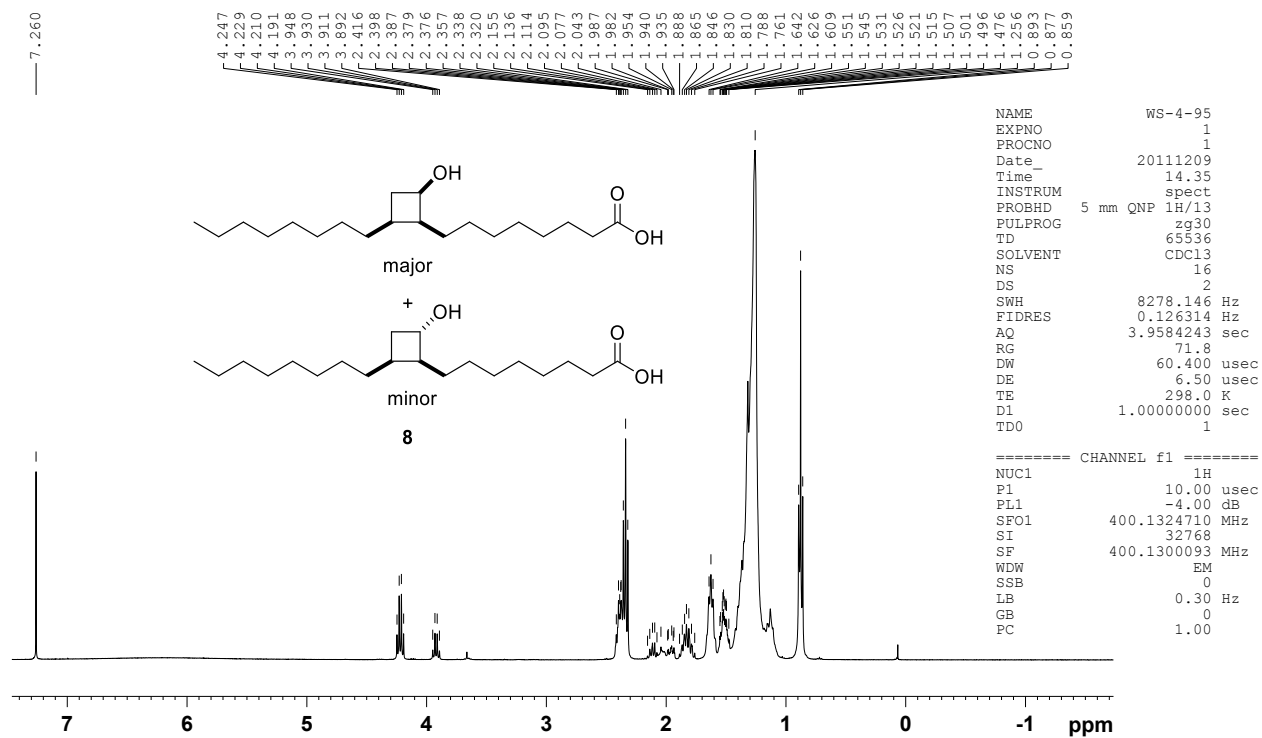Figure S25.1. <sup>1</sup>H-NMR (400 MHz, chloroform-*d*) spectrum of compound 8.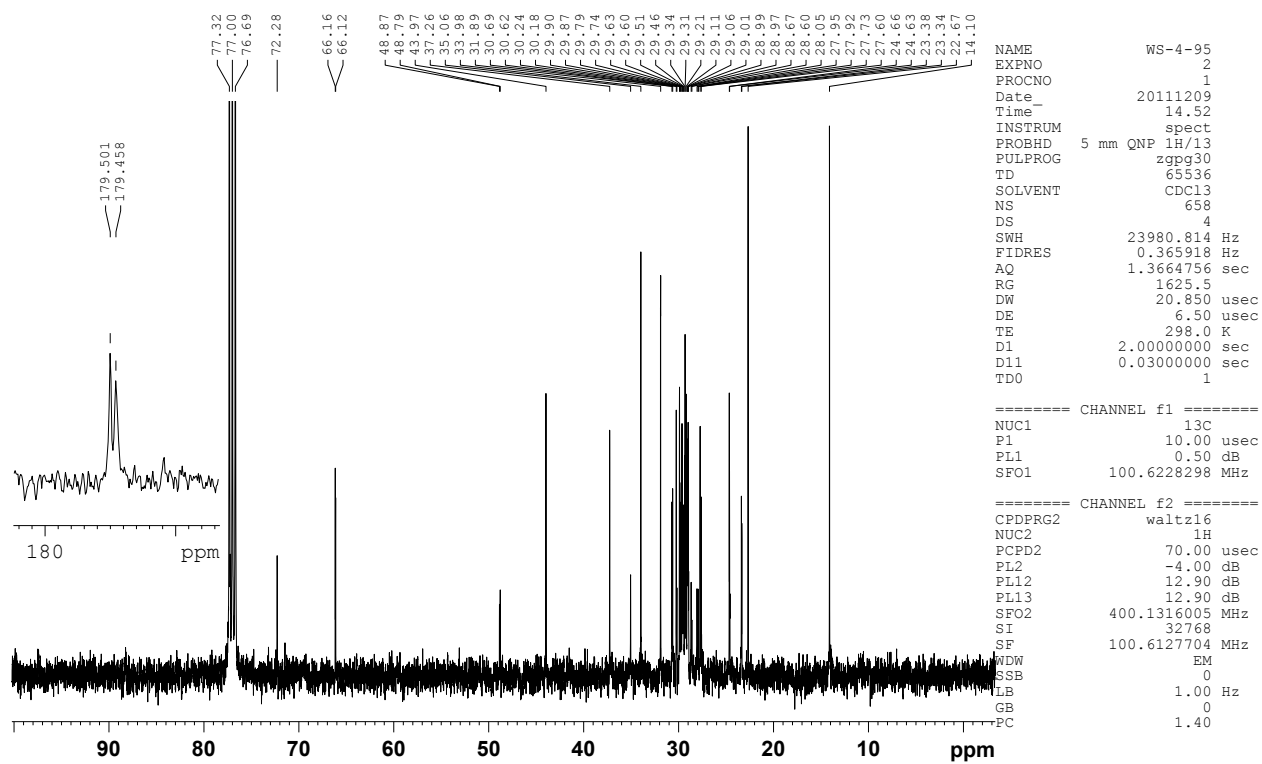Figure S25.2. <sup>13</sup>C-NMR (100 MHz, chloroform-*d*) spectrum of compound 8.

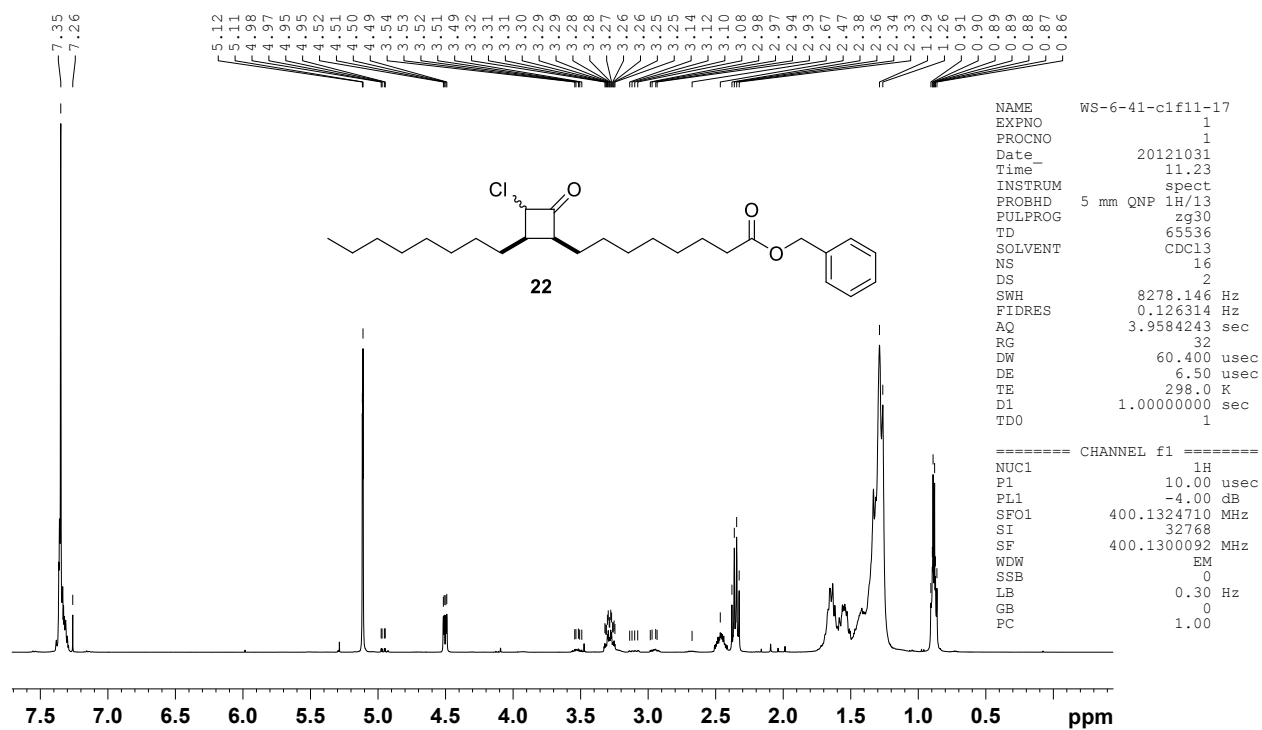Figure S26.1. <sup>1</sup>H-NMR (400 MHz, chloroform-*d*) spectrum of compound 22.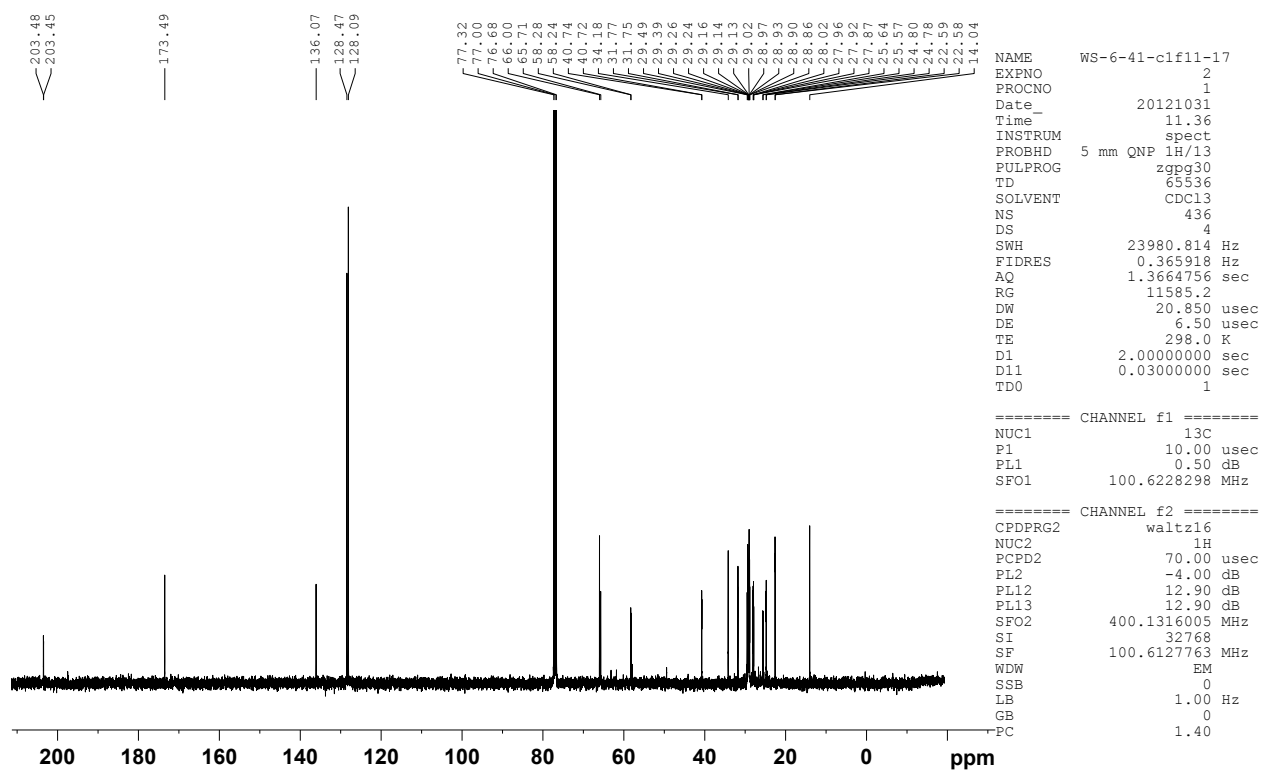Figure S26.2. <sup>13</sup>C-NMR (100 MHz, chloroform-*d*) spectrum of compound 22.

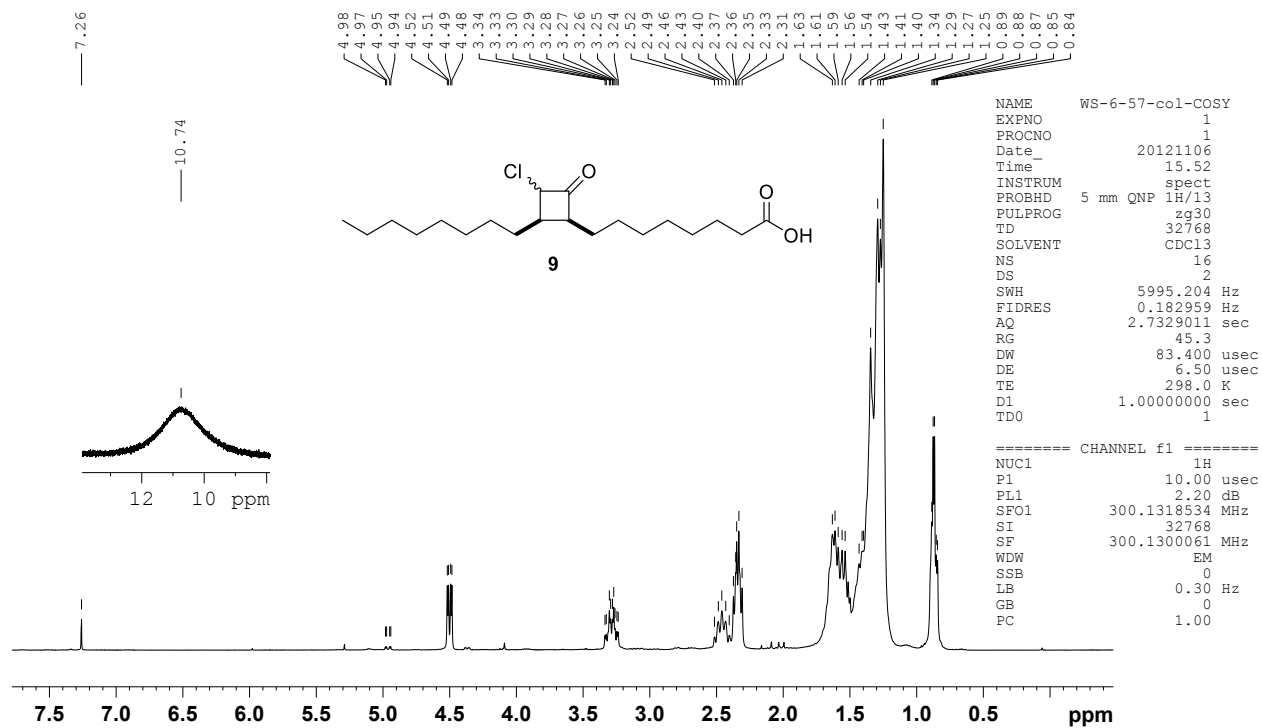

**Figure S27.1.** <sup>1</sup>H-NMR (400 MHz, chloroform-*d*) spectrum of compound **9**.

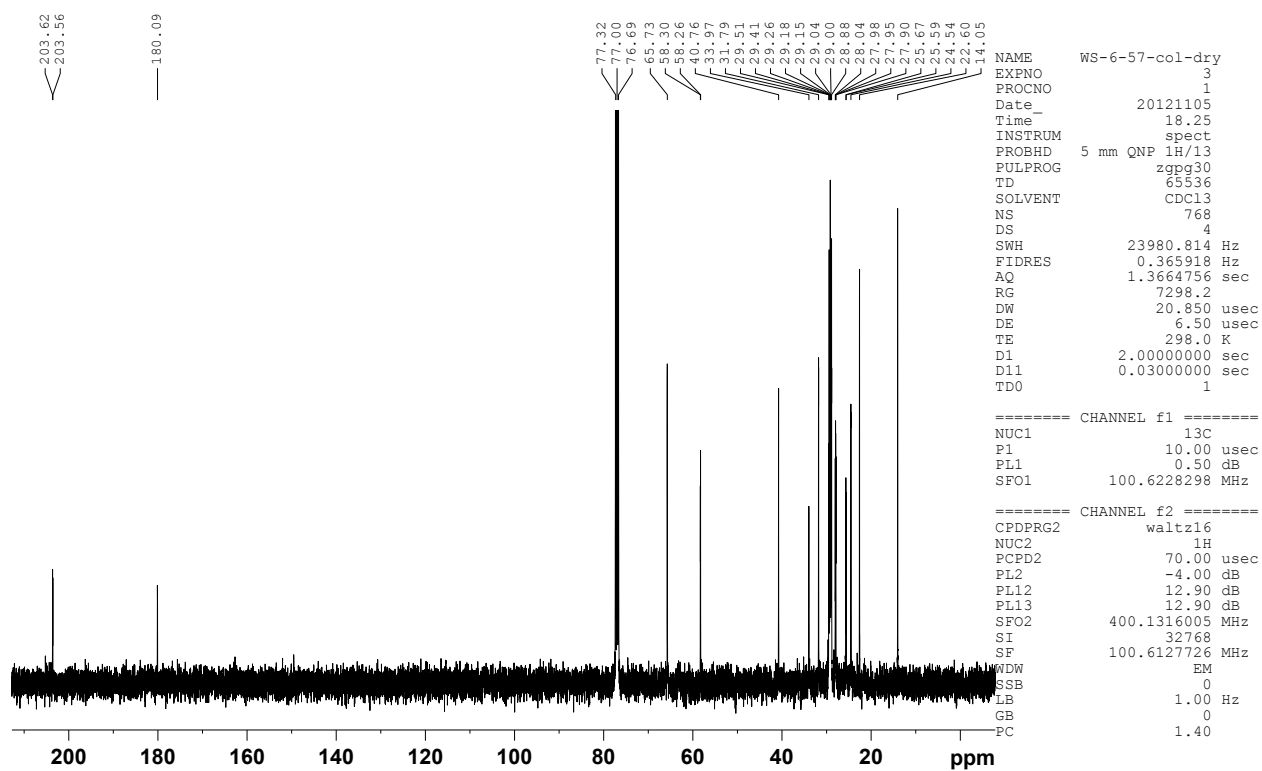

**Figure S27.2.** <sup>13</sup>C-NMR (100 MHz, chloroform-*d*) spectrum of compound **9**.

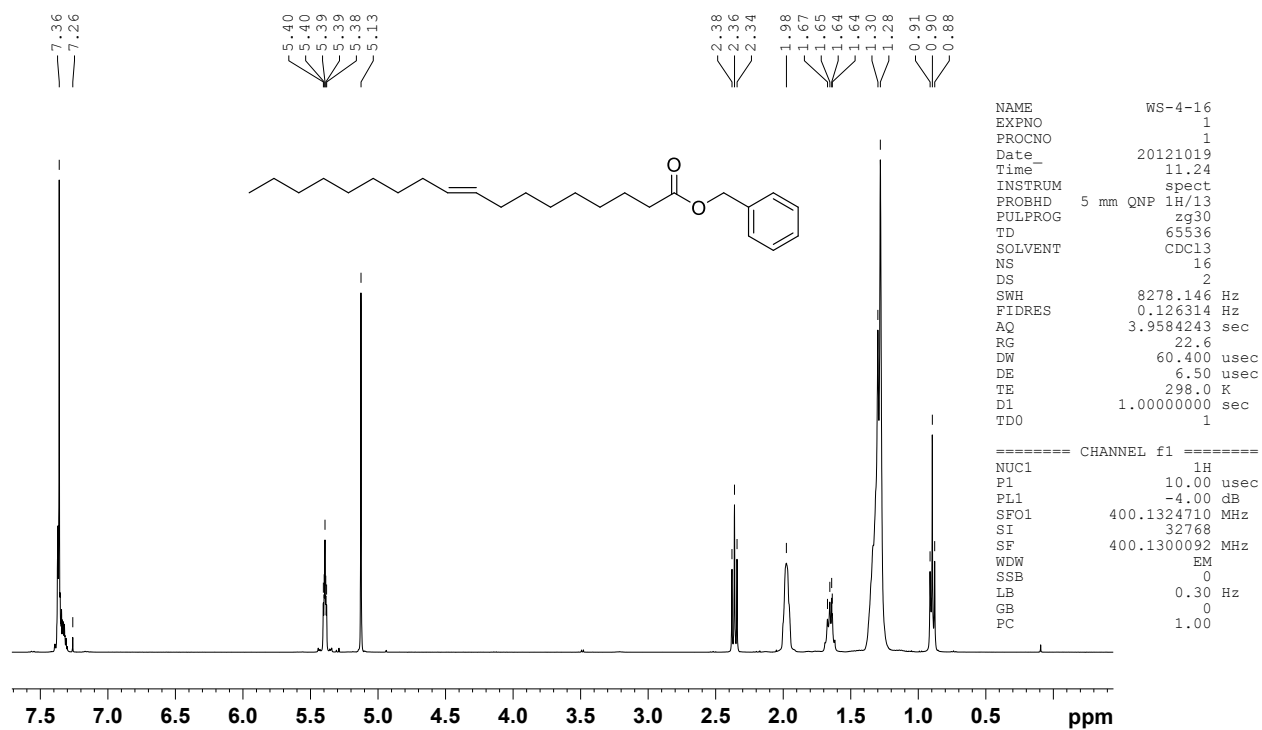

Figure S28.1. <sup>1</sup>H-NMR (400 MHz, chloroform-*d*) spectrum.

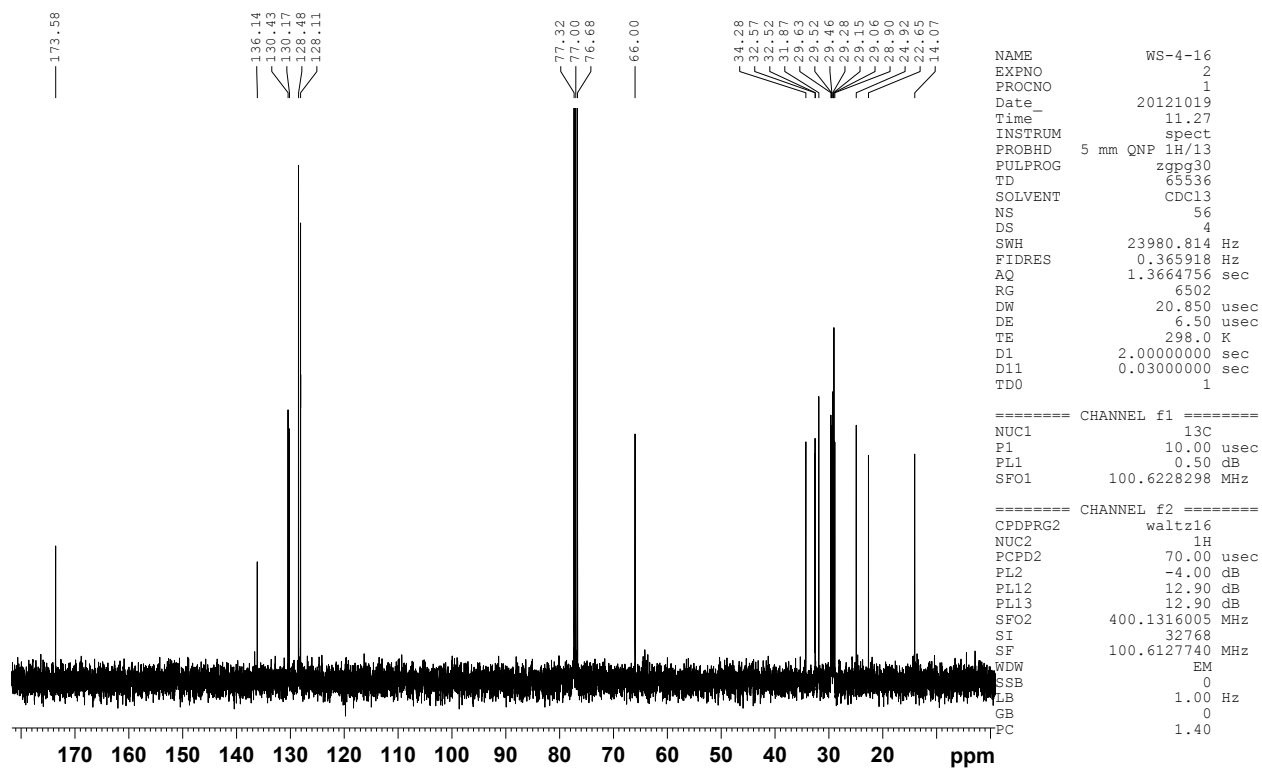

Figure S28.2. <sup>13</sup>C-NMR (100 MHz, chloroform-*d*) spectrum.

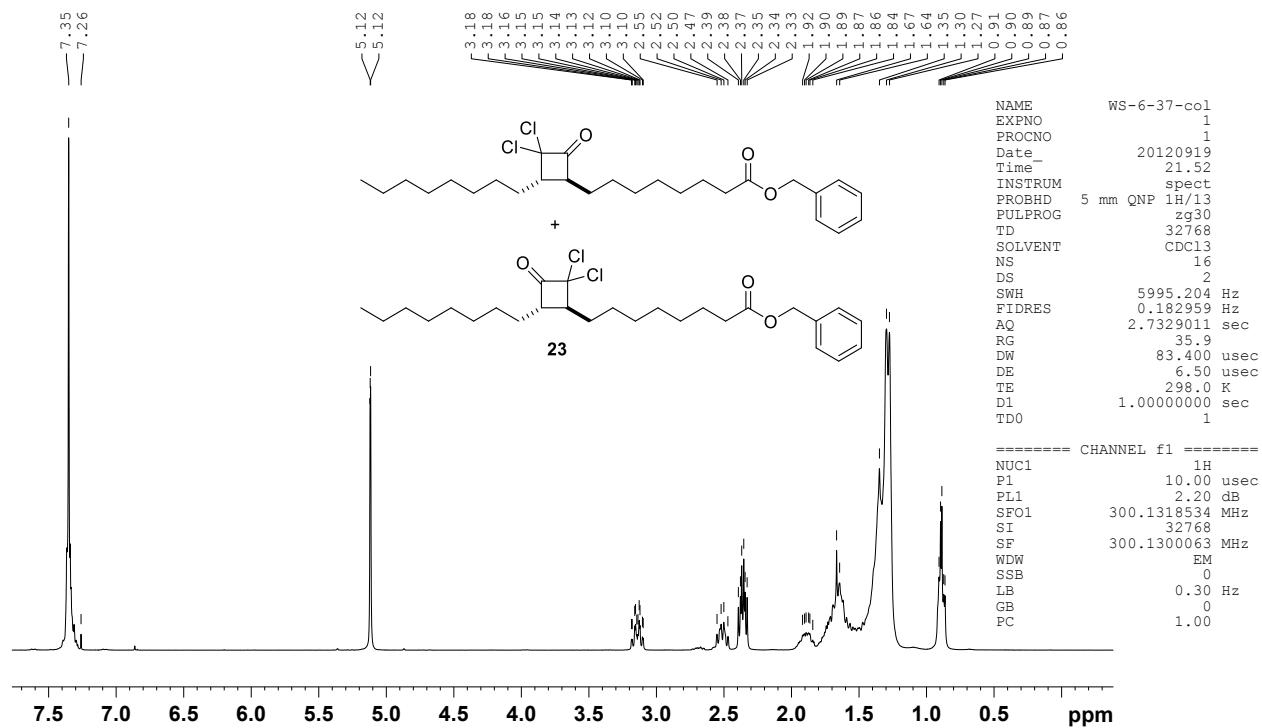

Figure S29.1. <sup>1</sup>H-NMR (400 MHz, chloroform-*d*) spectrum of **23**.

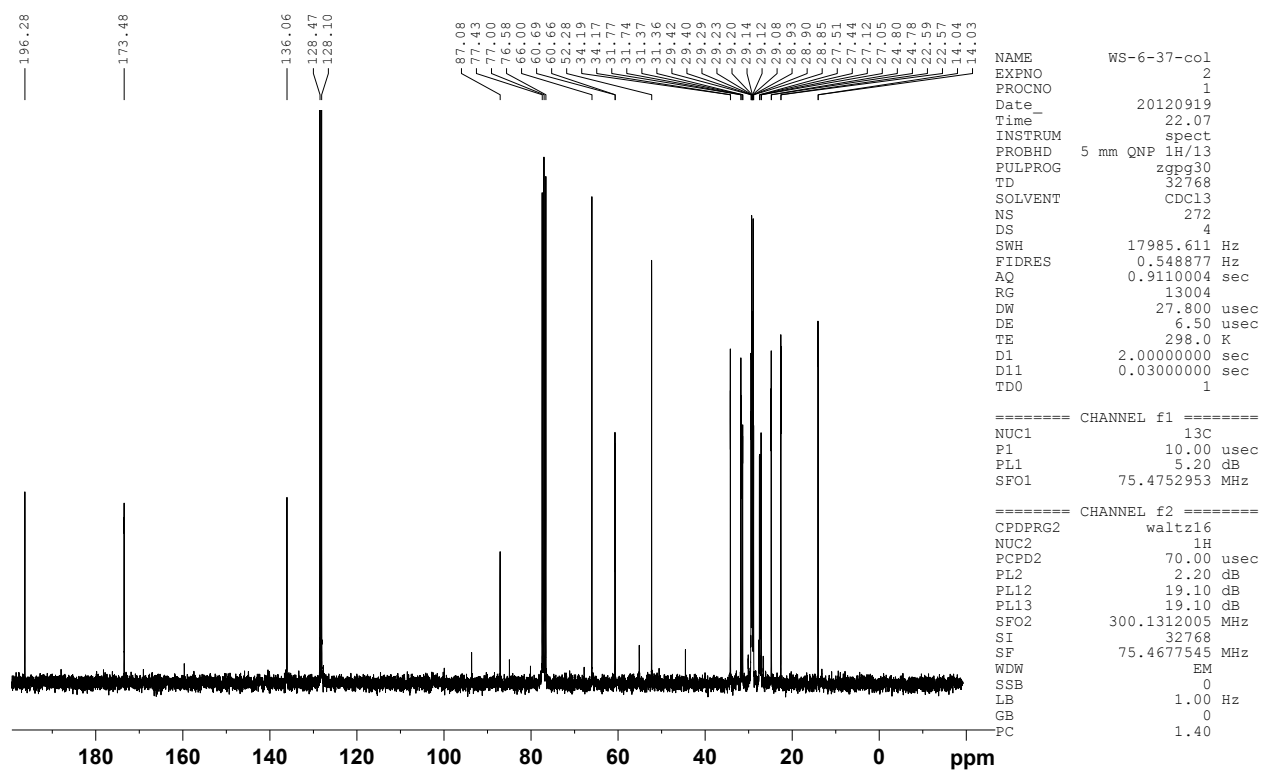

Figure S29.2. <sup>13</sup>C-NMR (100 MHz, chloroform-*d*) spectrum of **23**.

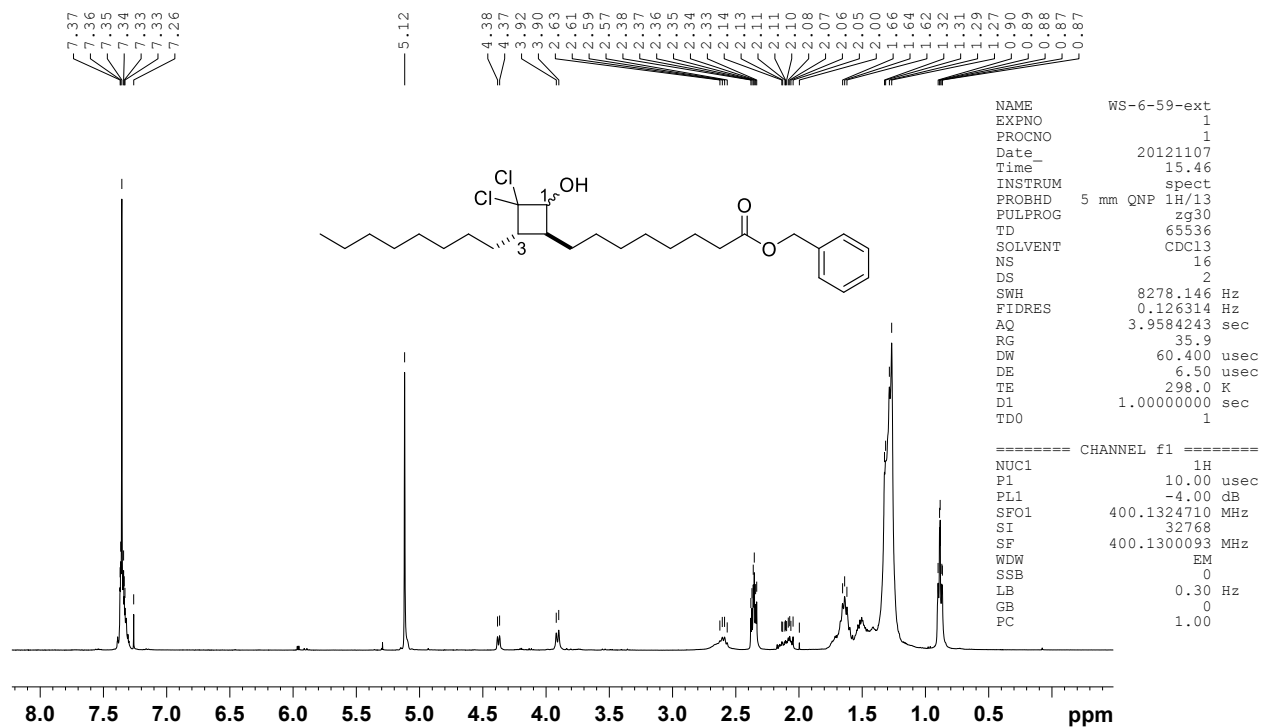

Figure S30.1. <sup>1</sup>H-NMR (400 MHz, chloroform-*d*) spectrum.

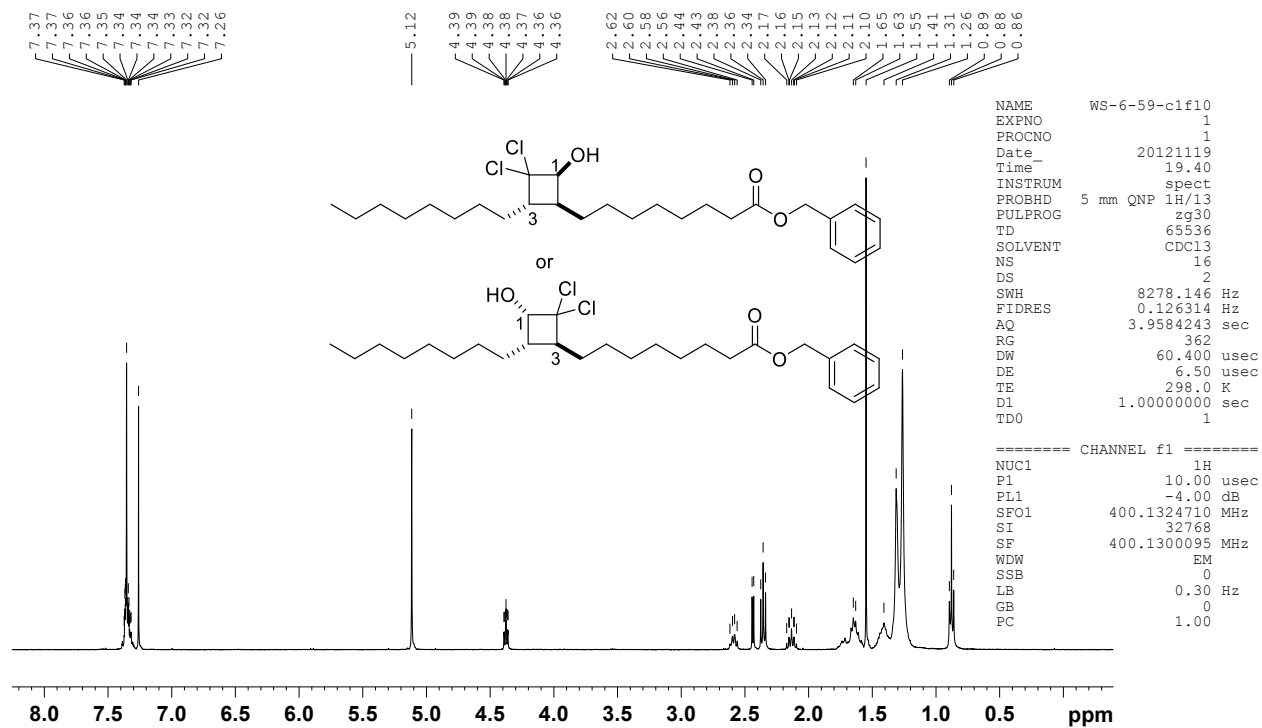

Figure S30.2. <sup>1</sup>H-NMR (400 MHz, chloroform-*d*) spectrum of first eluting *trans* isomer.

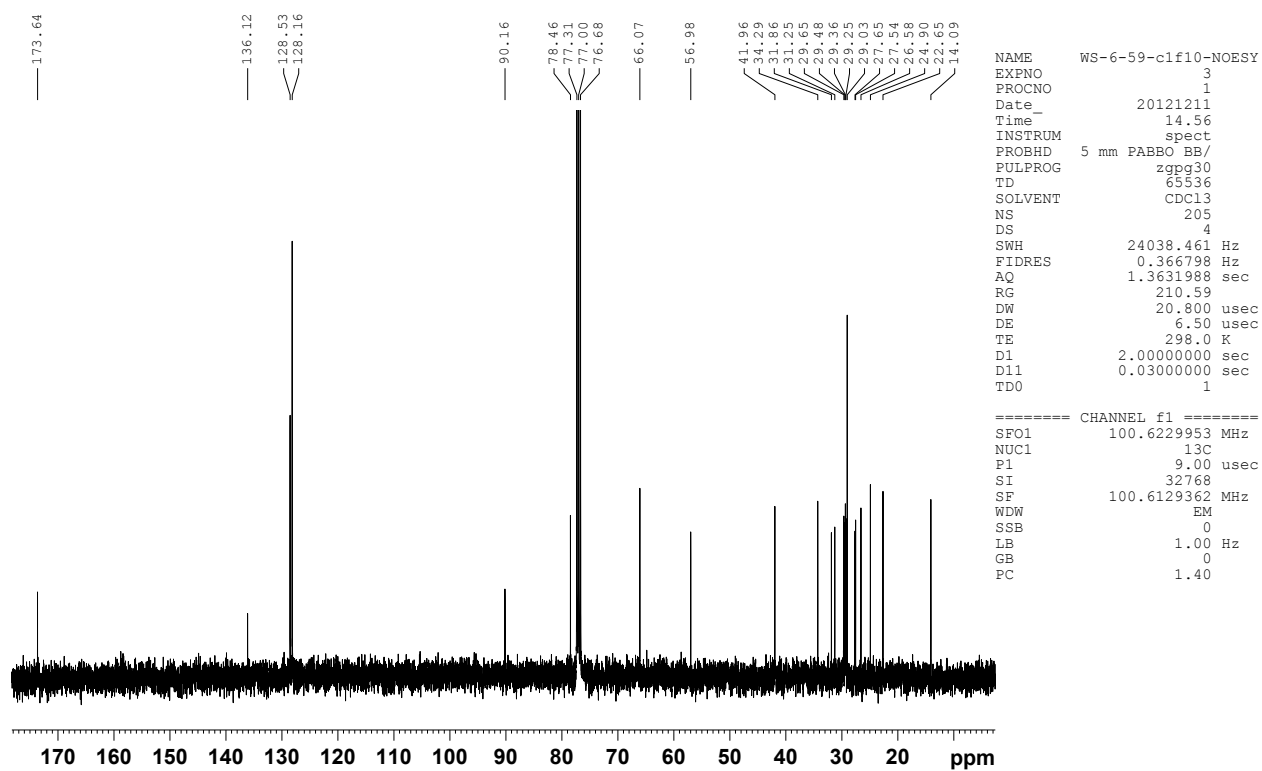

Figure S30.3. <sup>13</sup>C-NMR(100 MHz, chloroform-*d*) spectrum of first eluting *trans* isomer.





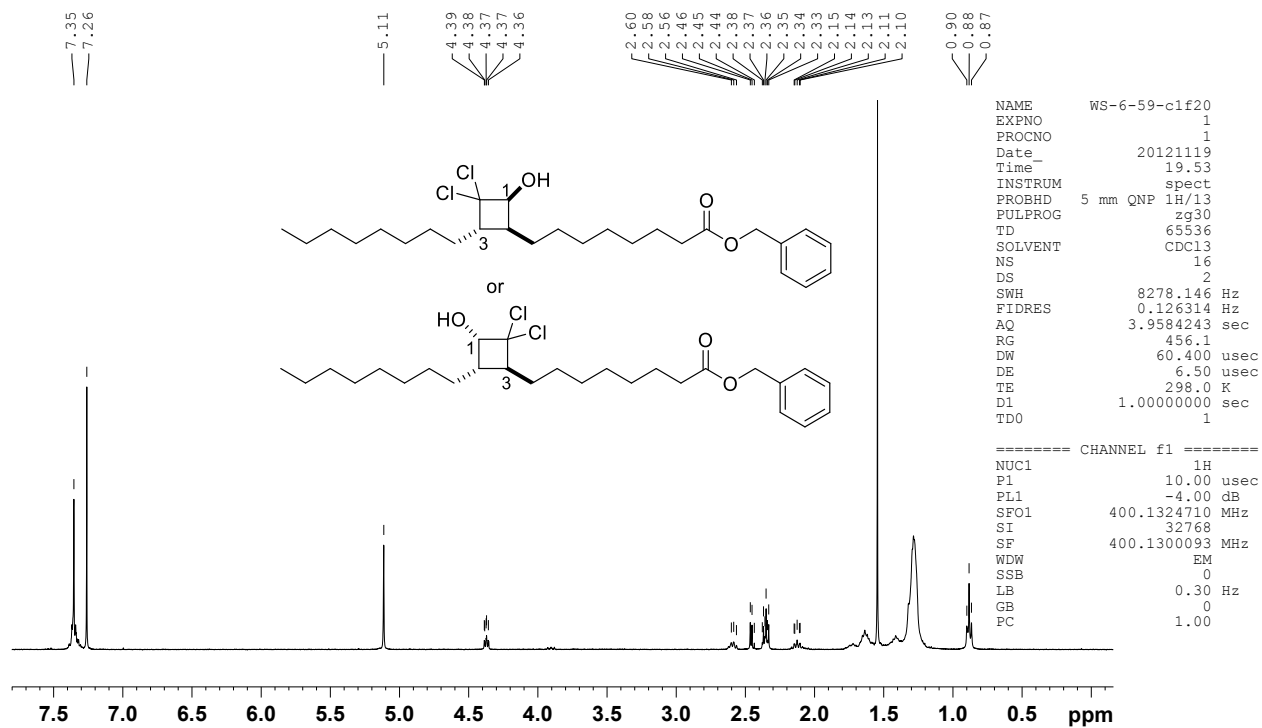

Figure S30.6. <sup>1</sup>H-NMR (400 MHz, chloroform-*d*) spectrum of second eluting *trans* isomer.

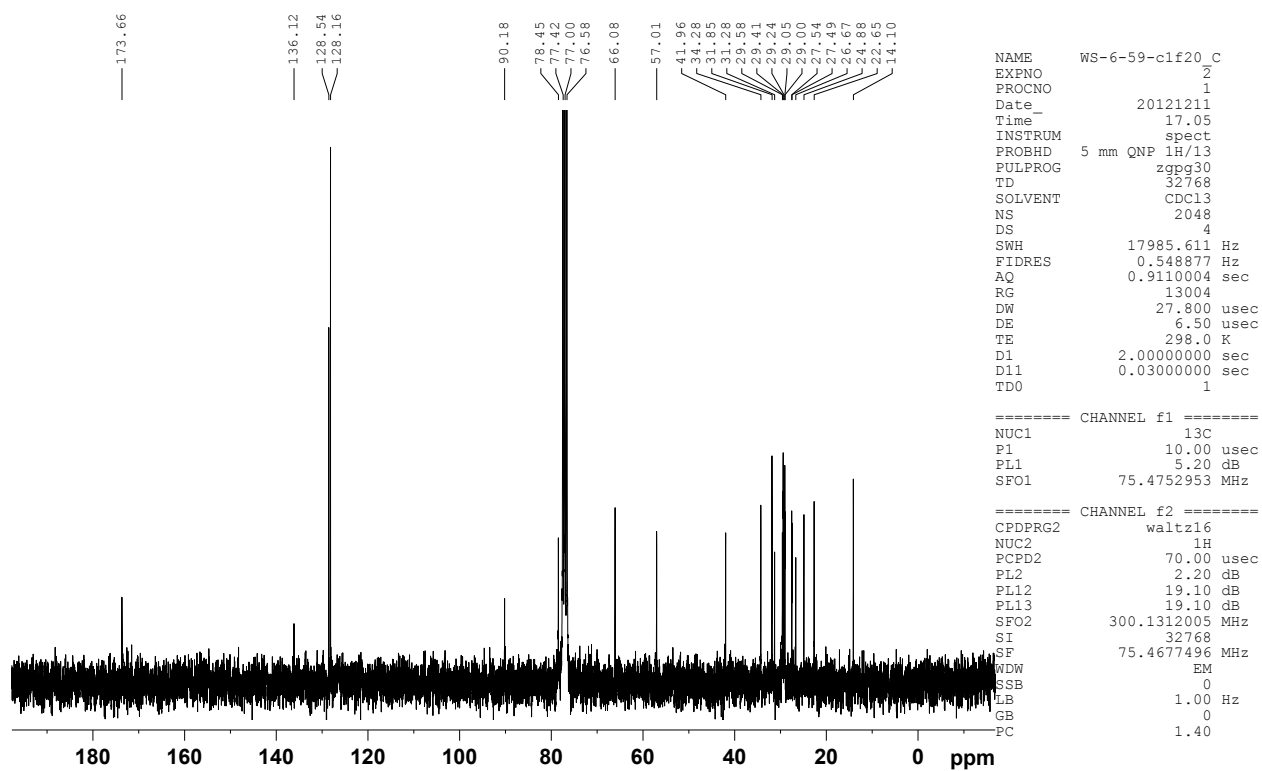

Figure S30.7. <sup>13</sup>C-NMR (100MHz, chloroform-*d*) spectrum of second eluting *trans* isomer.

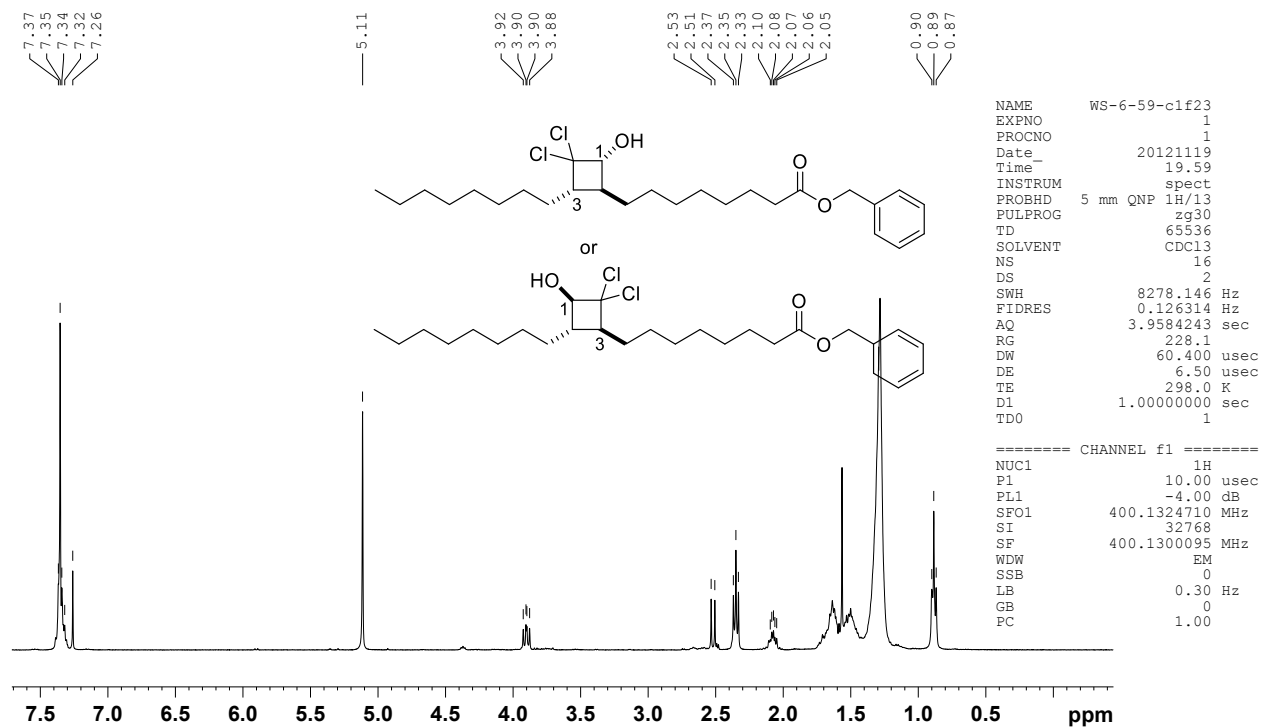

Figure S30.8. <sup>1</sup>H-NMR (400 MHz, chloroform-*d*) spectrum of second eluting *cis* isomer.

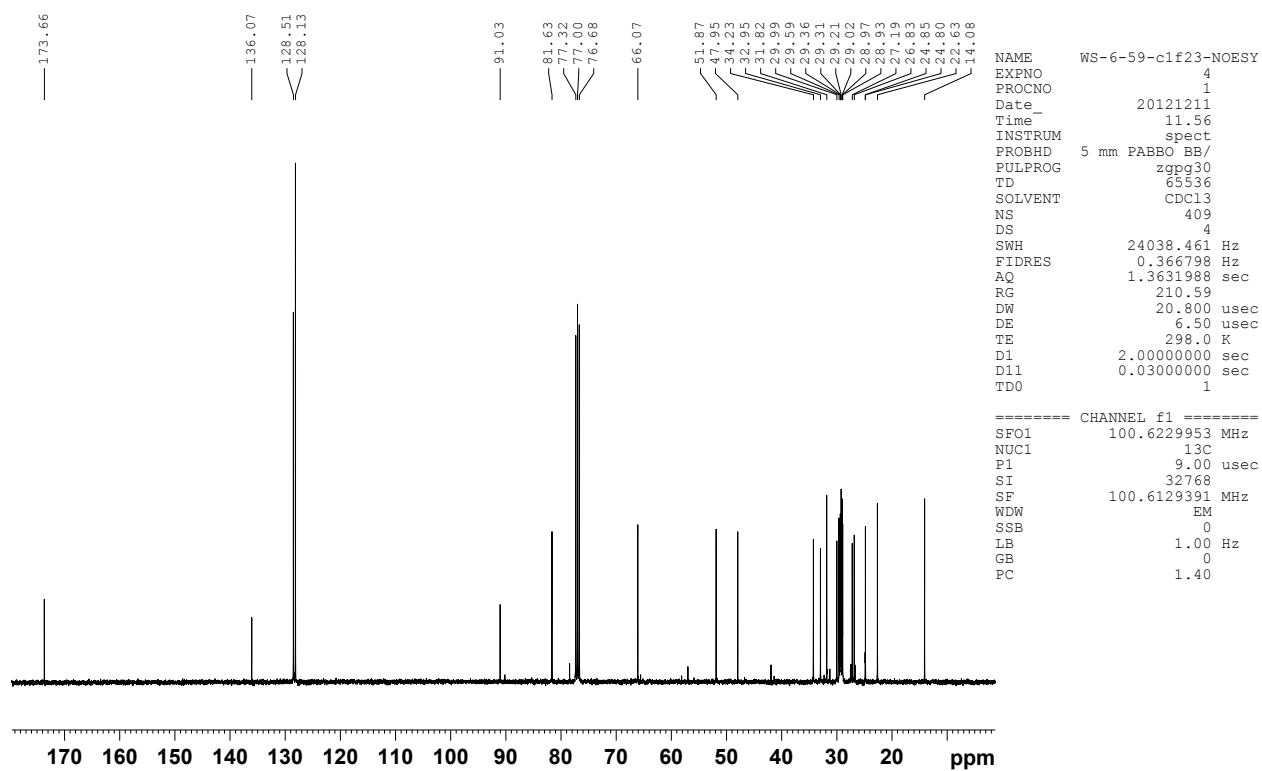

Figure S30.9. <sup>13</sup>C-NMR (100 MHz, chloroform-*d*) spectrum of second eluting *cis* isomer.

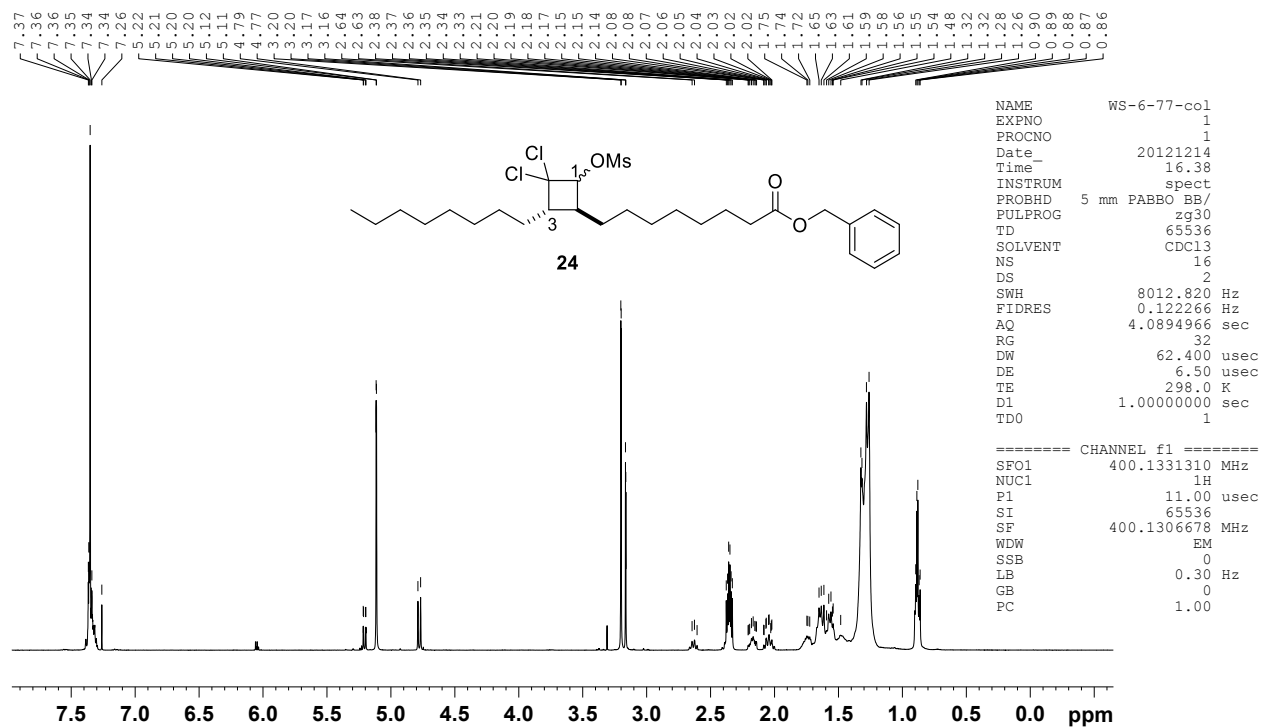

Figure S31.1. <sup>1</sup>H-NMR (400 MHz, chloroform-*d*) spectrum of **24**.

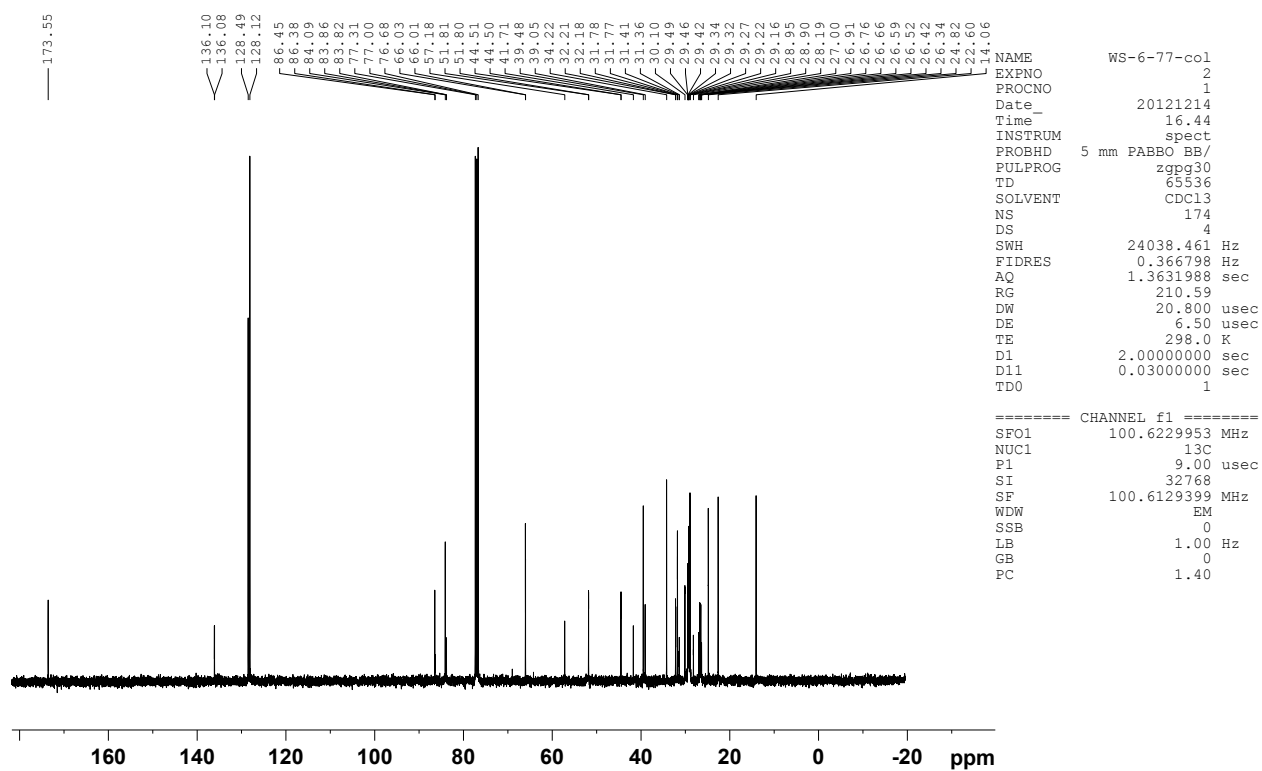

Figure S31.2. <sup>13</sup>C-NMR (100 MHz, chloroform-*d*) spectrum of **24**.

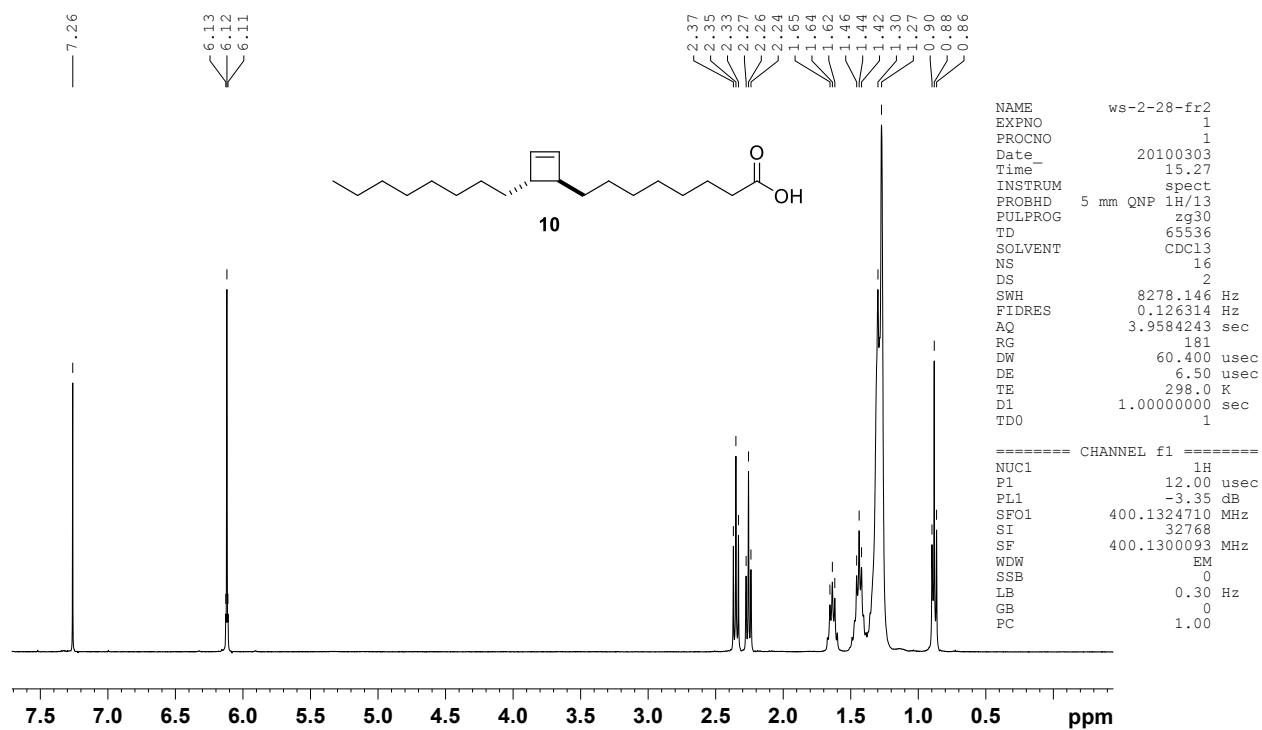

Figure S32.1. <sup>1</sup>H-NMR (400 MHz, chloroform-d) spectrum of **10**.

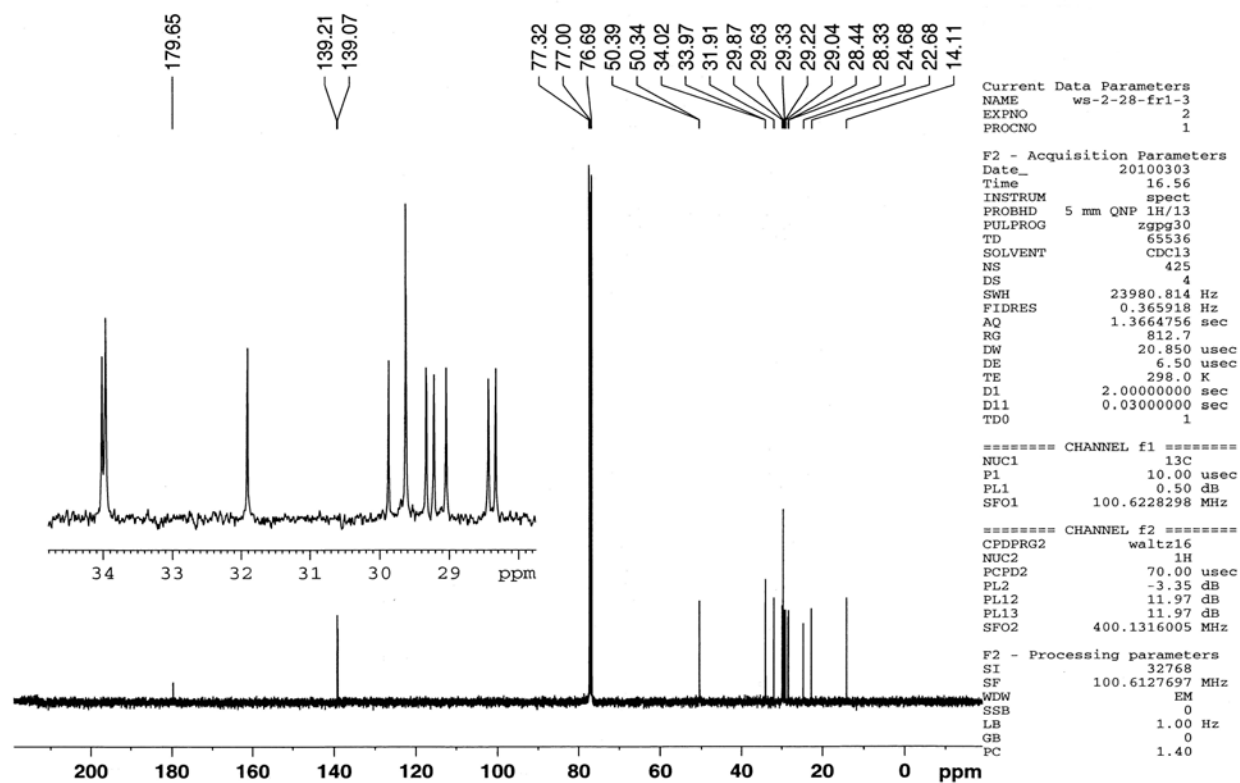

Figure S32.2. <sup>13</sup>C-NMR (100 MHz, chloroform-d) spectrum of **10**.

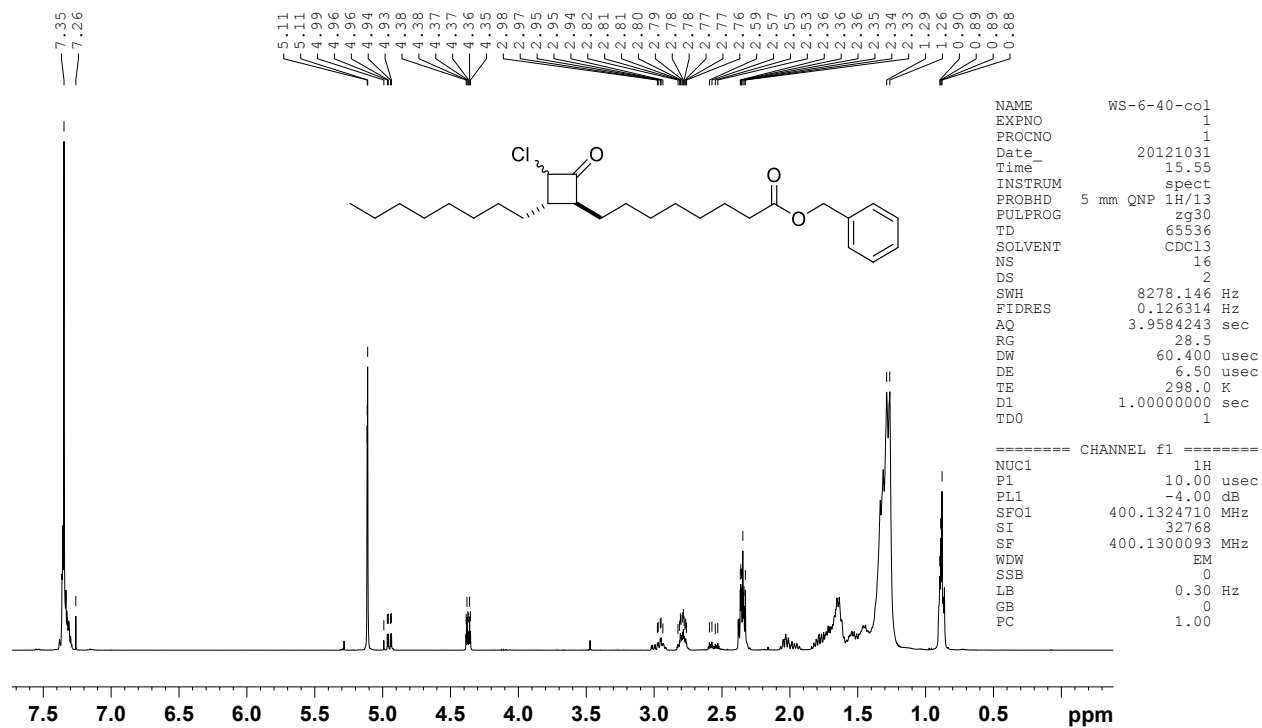

Figure S33.1. <sup>1</sup>H-NMR (400 MHz, chloroform-*d*) spectrum.

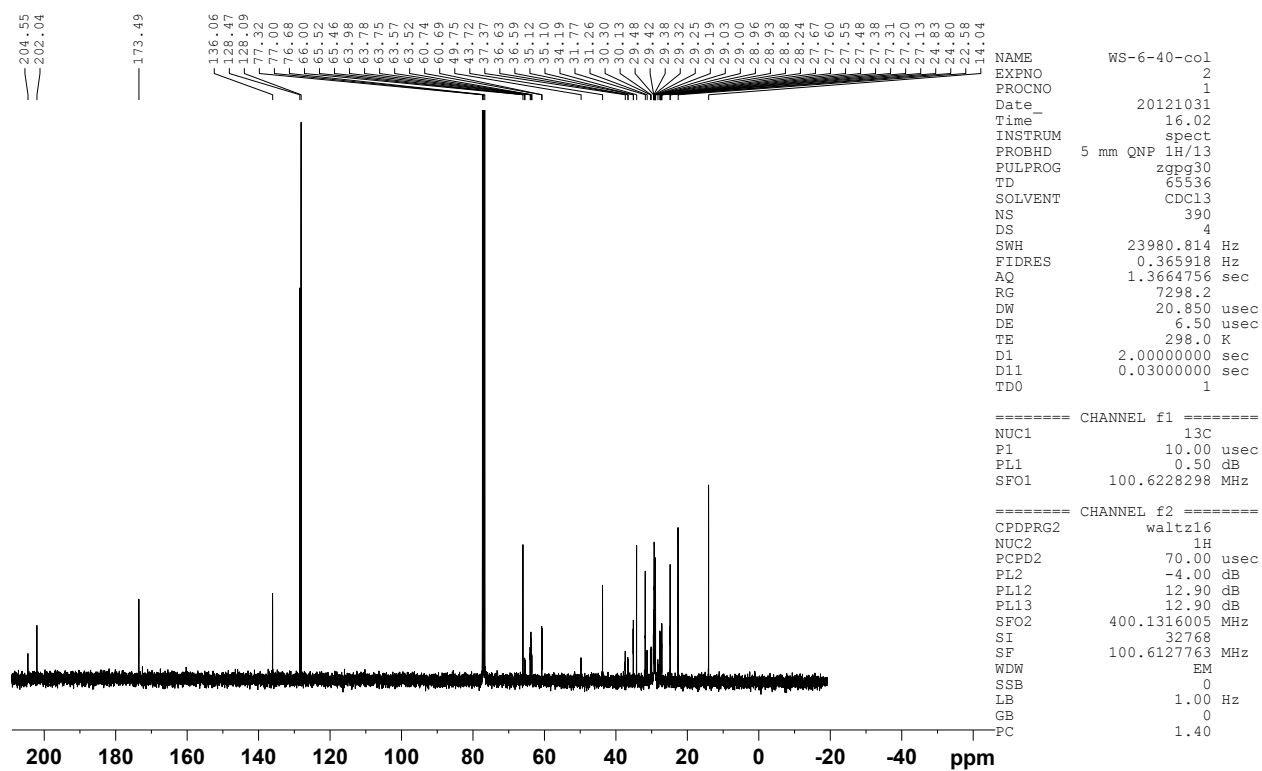

Figure S33.2. <sup>13</sup>C-NMR (100 MHz, chloroform-*d*) spectrum.

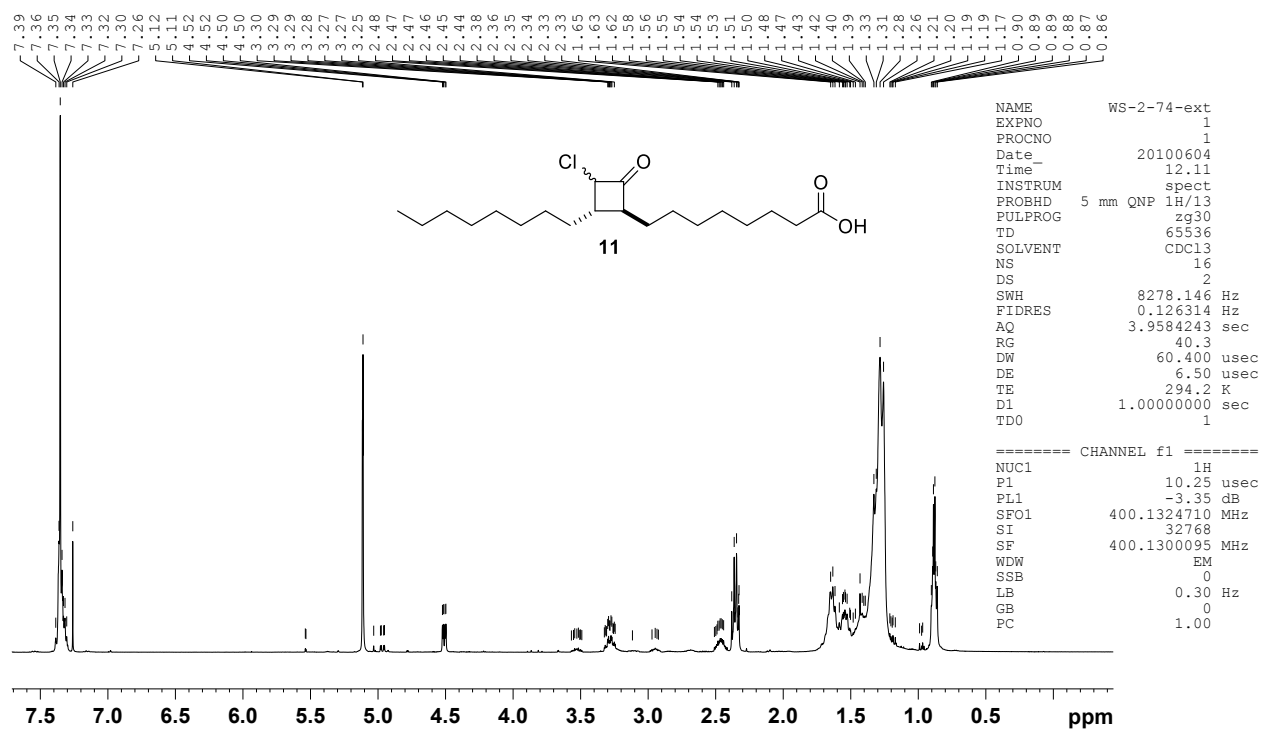

Figure S34.1. <sup>1</sup>H-NMR (400 MHz, chloroform-*d*) spectrum of **11**.

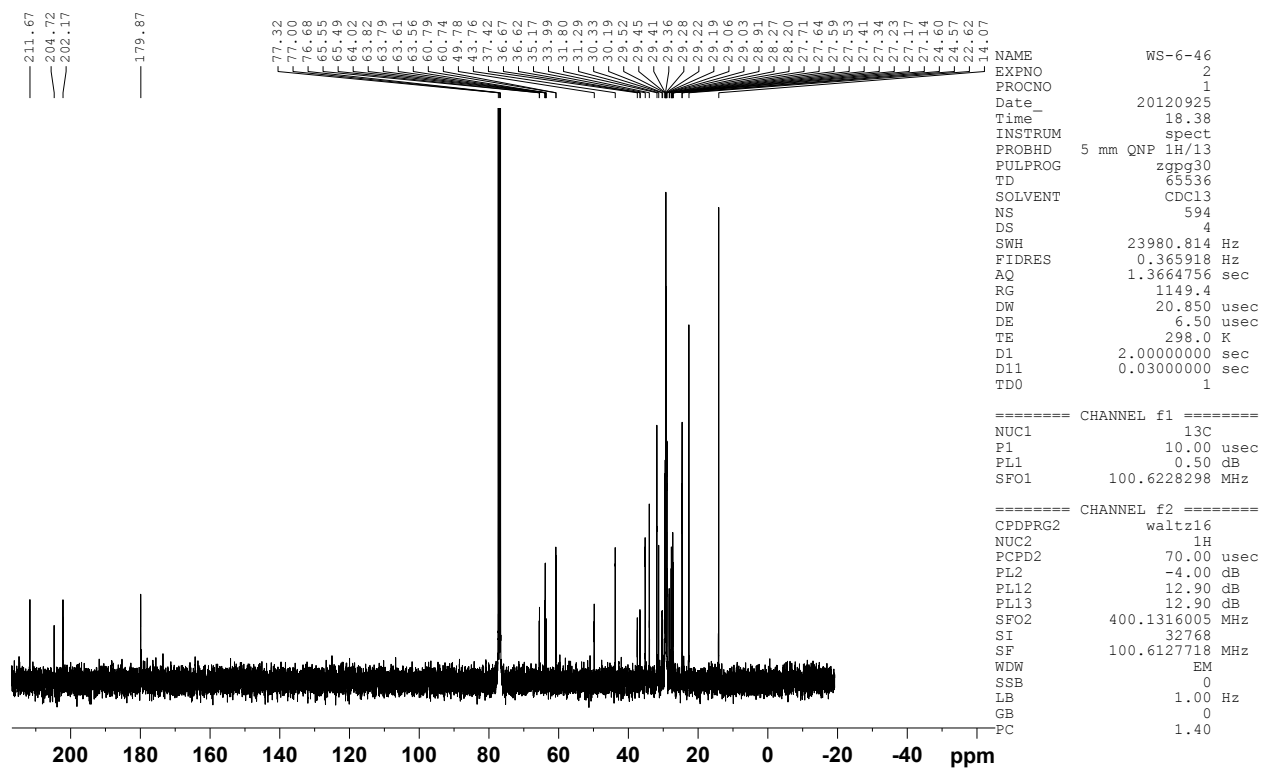

Figure S34.2. <sup>13</sup>C-NMR (100 MHz, chloroform-*d*) spectrum of **11**.
